# Supplementary material for: Genome-Wide Identification and Expression Analysis of bZIP Family Genes in <em>Stevia rebaudiana</em> Bertoni
Source: Preprints.org preprint supplement (doi:10.20944/preprints202307.2017.v1), 2023-07-31
Supplement: Supplementary file 1 [file supplementary]

## Sheet: S1
Table S1. Overview of bZIP TFs in S. rebaudiana.
ID in genomic data	Gene name	Protein length(aa)	MW/kDa	PI	Instability index（II）	Aliphatic index	GRAVY	Subcellular location
Streb.1G002080.1	SrbZIP1	254	28.18	6.3	34.29	64.09	-0.734	nucl
Streb.1G005290.1	SrbZIP2	295	32.52	9.83	47.23	79.32	-0.401	chlo
Streb.1G015330.1	SrbZIP3	640	70.61	6.42	49.36	86.86	-0.24	nucl
Streb.1G023230.1	SrbZIP4	272	32.12	4.74	50.6	89.89	-0.84	cyto
Streb.1G023880.1	SrbZIP5	349	38.97	6.07	59.16	58.57	-0.993	nucl
Streb.1G027430.1	SrbZIP6	424	46.63	6.34	61.28	61.7	-0.855	nucl
Streb.1G029990.1	SrbZIP7	165	19.22	9.45	51.9	79.7	-0.742	nucl
Streb.1G035990.1	SrbZIP8	540	60.15	6.69	61.58	68.56	-0.739	nucl
Streb.1G036060.1	SrbZIP9	310	35.07	4.91	43.04	59.68	-1.075	nucl
Streb.1G050640.1	SrbZIP10	351	40.36	5.38	55.37	85.58	-0.505	nucl
Streb.1G050880.1	SrbZIP11	284	32.02	8.46	40.7	68.03	-0.89	nucl
Streb.2G000300.1	SrbZIP12	693	74.91	5.64	47.34	70.56	-0.461	E.R.
Streb.2G001010.1	SrbZIP13	96	10.88	8.96	47.81	83.33	-0.733	nucl
Streb.2G002460.1	SrbZIP14	423	46.25	9.49	53.42	63.64	-0.786	nucl
Streb.2G002660.1	SrbZIP15	383	43.05	8.76	58.01	81.83	-0.403	nucl
Streb.2G012600.1	SrbZIP16	329	36.71	8.64	62.4	81.06	-0.518	nucl
Streb.2G013060.1	SrbZIP17	704	77.31	6.35	47.65	78.18	-0.456	E.R.
Streb.2G013100.1	SrbZIP18	342	38.57	6.21	62.85	81.35	-0.577	nucl
Streb.2G017730.1	SrbZIP19	361	41.27	6.47	58.45	79.2	-0.531	nucl
Streb.2G036150.1	SrbZIP20	450	50.35	6.21	51.92	79.84	-0.44	nucl
Streb.2G043690.1	SrbZIP21	323	35.56	4.64	53.64	73.9	-0.471	nucl
Streb.2G044080.1	SrbZIP22	324	36.28	6.57	40.8	77.47	-0.65	nucl
Streb.2G044340.1	SrbZIP23	251	27.66	6.79	35.81	57.89	-0.783	nucl
Streb.2G044370.1	SrbZIP24	238	26.75	9.75	58.03	68.4	-0.614	nucl
Streb.2G045420.1	SrbZIP25	128	15.38	9.18	42.88	75.39	-1.129	cyto
Streb.2G045590.1	SrbZIP26	128	15.38	8.66	42.47	75.39	-1.133	nucl
Streb.2G045750.1	SrbZIP27	115	13.92	8.66	47.01	66.96	-1.425	cyto
Streb.2G046520.1	SrbZIP28	216	24.78	9.64	63.56	64.63	-0.972	nucl
Streb.2G047250.1	SrbZIP29	164	18.42	5.93	47.89	71.34	-0.715	nucl
Streb.2G049130.1	SrbZIP30	360	40.99	6.48	41.3	89.5	-0.439	nucl
Streb.2G058200.1	SrbZIP31	375	40.92	5.4	60.89	60.37	-0.727	nucl
Streb.2G058740.1	SrbZIP32	224	25.59	9.64	61.11	63.12	-0.888	nucl
Streb.3G007530.1	SrbZIP33	238	26.75	9.75	58.03	68.4	-0.614	nucl
Streb.3G007840.1	SrbZIP34	146	17.21	7.92	70.74	67.4	-1.118	nucl
Streb.3G008130.1	SrbZIP35	182	21.27	6.37	64.27	72.25	-0.958	nucl
Streb.3G008630.1	SrbZIP36	182	21.29	6.37	59.95	74.4	-0.924	nucl
Streb.3G011120.1	SrbZIP37	159	18.49	9.56	53	93.02	-0.54	nucl
Streb.3G012510.1	SrbZIP38	325	35.4	5.89	67.24	37.6	-1.135	nucl
Streb.3G020020.1	SrbZIP39	153	17.96	6.19	52.11	65.03	-1.003	nucl
Streb.3G020060.1	SrbZIP40	353	41.1	6.68	53.7	87.31	-0.531	nucl
Streb.3G021150.1	SrbZIP41	313	34.72	6.77	50.42	62.43	-0.785	nucl
Streb.3G021180.1	SrbZIP42	346	38.2	5.38	53.82	61.13	-0.768	nucl
Streb.3G021200.1	SrbZIP43	376	40.7	5.85	62.28	47.53	-1.046	nucl
Streb.3G031640.1	SrbZIP44	331	36.54	6.06	44.69	67.28	-0.84	nucl
Streb.4G010130.1	SrbZIP45	376	40.61	5.65	61.13	49.87	-1.009	nucl
Streb.4G010840.1	SrbZIP46	343	37.89	5.31	55.07	61.66	-0.748	nucl
Streb.4G011920.1	SrbZIP47	285	31.95	6.02	60.94	58.6	-0.923	nucl
Streb.4G016370.1	SrbZIP48	347	39.51	9.43	49.04	67.15	-0.904	nucl
Streb.4G018140.1	SrbZIP49	134	15.73	9.72	58.24	58.96	-1.004	nucl
Streb.4G018680.1	SrbZIP50	134	15.76	9.44	66.07	61.12	-0.963	nucl
Streb.4G020480.1	SrbZIP51	290	32.6	5.9	39.31	80.41	-0.578	nucl
Streb.4G021440.1	SrbZIP52	325	36.99	6.25	42.45	77.14	-0.737	nucl
Streb.5G004740.1	SrbZIP53	320	36.33	6.22	44.37	79.25	-0.644	nucl
Streb.5G015740.1	SrbZIP54	310	35.65	9.38	52.36	66.06	-0.834	nucl
Streb.5G023990.1	SrbZIP55	458	49.45	6.05	56	62.18	-0.701	nucl
Streb.5G027580.1	SrbZIP56	469	50.79	6.29	55.83	62.39	-0.695	nucl
Streb.6G000950.1	SrbZIP57	242	26.61	9.47	62.03	58.51	-0.821	nucl
Streb.6G001650.1	SrbZIP58	193	22.66	5.09	54.66	65.13	-0.939	nucl
Streb.6G004770.1	SrbZIP59	156	18.23	9.67	56.66	64.94	-1.054	nucl
Streb.6G009510.1	SrbZIP60	348	37.48	5.87	58.35	38.74	-1.05	nucl
Streb.6G020290.1	SrbZIP61	401	43.4	9.67	41.71	63.17	-0.656	nucl
Streb.6G025310.1	SrbZIP62	158	18.17	6.19	38.1	76.52	-0.746	nucl
Streb.6G030450.1	SrbZIP63	148	16.73	7.93	49.6	80.47	-0.699	nucl
Streb.7G004160.1	SrbZIP64	164	19.6	5.47	62.22	61.22	-0.962	nucl
Streb.7G006650.1	SrbZIP65	174	19.21	9.12	50.71	67.3	-0.783	nucl
Streb.7G006760.1	SrbZIP66	343	38.28	6.52	53.75	58.95	-0.922	nucl
Streb.7G012790.1	SrbZIP67	171	19.33	5.52	59.19	67.25	-0.751	nucl
Streb.7G012800.1	SrbZIP68	413	45.88	8.96	48.46	70.07	-0.698	nucl
Streb.7G013610.1	SrbZIP69	146	16.41	8.66	67.37	69.52	-0.695	nucl
Streb.7G013650.1	SrbZIP70	311	34.22	5.35	63.46	59.94	-0.812	nucl
Streb.7G014910.1	SrbZIP71	266	29.45	5.45	50.4	83.91	-0.408	nucl
Streb.7G015520.1	SrbZIP72	303	34.2	8.99	42.63	71.12	-0.927	nucl
Streb.7G016740.1	SrbZIP73	360	38.87	6.53	50.19	51.61	-0.921	nucl
Streb.7G020660.1	SrbZIP74	147	16.9	6.84	53.22	90.27	-0.65	nucl
Streb.7G021050.1	SrbZIP75	382	41.04	6.06	56.79	56.02	-0.871	nucl
Streb.7G027260.1	SrbZIP76	360	38.54	5.71	60.82	44.56	-1.002	nucl
Streb.8G007770.1	SrbZIP77	318	35.43	8.6	47.69	66.45	-0.967	nucl
Streb.8G011540.1	SrbZIP78	373	40.92	9.57	42.53	64.5	-0.681	nucl
Streb.8G011630.1	SrbZIP79	334	37.99	9.28	60.58	68.08	-0.919	nucl
Streb.8G013110.1	SrbZIP80	221	25.93	5.22	47.1	56.02	-1.059	nucl
Streb.8G014850.1	SrbZIP81	347	39.8	6.52	46.64	82.1	-0.645	nucl
Streb.8G014960.1	SrbZIP82	363	42.03	7.64	49.78	92.7	-0.452	nucl
Streb.8G015740.1	SrbZIP83	171	19.32	10.05	51.55	69.06	-0.632	nucl
Streb.8G019610.1	SrbZIP84	151	17.25	6.96	67.48	72.32	-0.617	nucl
Streb.9G002160.1	SrbZIP85	149	16.84	9.89	63.62	59.66	-0.868	nucl
Streb.9G003580.1	SrbZIP86	137	15.67	6.64	60.5	71.17	-0.626	nucl
Streb.9G007710.1	SrbZIP87	363	41.52	7.66	50.07	86.06	-0.439	nucl
Streb.9G008940.1	SrbZIP88	250	28.61	5.5	73.86	104.04	-0.386	nucl
Streb.9G023690.1	SrbZIP89	154	17.02	9.72	60.21	57.86	-0.929	nucl
Streb.9G026660.1	SrbZIP90	154	17	9.56	60.88	57.86	-0.926	nucl
Streb.9G027520.1	SrbZIP91	315	34.93	8.96	63.88	81.27	-0.533	nucl
Streb.9G027550.1	SrbZIP92	266	28.78	6.46	58.25	49.25	-0.954	nucl
Streb.10G008960.1	SrbZIP93	360	38.61	6.41	57.19	48.25	-0.985	nucl
Streb.10G010340.1	SrbZIP94	186	21.85	9.71	58.73	71.72	-0.826	nucl
Streb.10G026000.1	SrbZIP95	311	34.41	6.09	35.5	62.96	-0.788	nucl
Streb.10G030660.1	SrbZIP96	298	33.82	7.72	60.06	70.34	-0.84	nucl
Streb.11G004130.1	SrbZIP97	534	59.83	7.16	56.84	76.74	-0.515	nucl
Streb.11G004220.1	SrbZIP98	184	21.03	9.03	45.49	90.05	-0.51	nucl
Streb.11G006240.1	SrbZIP99	182	21.28	5.78	50.47	60.55	-0.963	nucl
Streb.11G009130.1	SrbZIP100	182	21.33	5.65	53.99	64.29	-0.92	nucl
Streb.11G010070.1	SrbZIP101	136	15.35	10.08	40.6	85.96	-0.773	nucl
Streb.11G012820.1	SrbZIP102	533	58.3	6.95	62.2	60.99	-0.9	nucl
Streb.11G016810.1	SrbZIP103	303	34.17	5.71	61.12	61.85	-0.861	nucl
Streb.11G019880.1	SrbZIP104	347	37.48	5.1	63.94	38.62	-1.047	nucl
Streb.11G020140.1	SrbZIP105	183	21.64	6.19	66.43	68.2	-1.038	nucl
Note. aa, amino acid; MW, molecular weight; pI, isoelectric point; GRAVY, grand average of hydropathicity; nucl, nucleus; E.R., endoplasmic reticulum; chlo, chloroplast; cyto, cytoplasm.

## Sheet: S2
Table S2. Chromosomal location and fragment duplication of SrbZIP gene in S. rebaudiana.
Chr1	91525340	91528054	Chr1	143118350	143121066
Chr1	35140133	35140896	Chr2	155897933	155898412
Chr1	35140133	35140896	Chr4	95974753	95975258
Chr1	35140133	35140896	Chr7	89908167	89909131
Chr10	23416239	23419140	Chr3	11695223	11700533
Chr11	97650689	97653334	Chr2	4957590	4959788
Chr11	97650689	97653334	Chr2	5358857	5361031
Chr2	137332403	137333666	Chr2	160272769	160274117
Chr2	160272769	160274117	Chr4	102645610	102646738
Chr2	155897933	155898412	Chr4	95974753	95975258
Chr2	156853760	156858466	Chr4	97135056	97141072
Chr2	153655328	153656129	Chr4	91099654	91100537
Chr2	154464072	154464834	Chr4	91099654	91100537
Chr2	151890953	151893107	Chr4	78217984	78223271
Chr2	154093835	154094598	Chr4	91099654	91100537
Chr2	137332403	137333666	Chr5	104000772	104002612
Chr2	174659809	174663787	Chr5	97643349	97646372
Chr2	137332403	137333666	Chr6	4132841	4134361
Chr2	155897933	155898412	Chr7	89908167	89909131
Chr2	156853760	156858466	Chr7	89122302	89125587
Chr2	137332403	137333666	Chr9	90084029	90085259
Chr3	10224051	10228820	Chr3	11695223	11700533
Chr3	10737575	10743117	Chr3	11002008	11007495
Chr3	14565839	14567651	Chr6	13190150	13192083
Chr4	95974753	95975258	Chr7	89908167	89909131
Chr4	97135056	97141072	Chr7	89122302	89125587
Chr4	100790430	100793833	Chr9	58232754	58235101
Chr5	104000772	104002612	Chr6	4132841	4134361
Chr5	104000772	104002612	Chr9	90084029	90085259
Chr6	86258270	86259624	Chr9	3628173	3629449
Chr6	78257553	78260736	Chr9	14591778	14594212
Chr7	74414987	74421254	Chr7	76548546	76554791

## Sheet: S3
Table S3. Distribution type and chromosomal location of SrbZIP gene in S. rebaudiana.
Chr1	Streb.1G002080.1	Dispersed
Chr1	Streb.1G005290.1	Dispersed
Chr1	Streb.1G015330.1	WGD or Segmental
Chr1	Streb.1G023230.1	Dispersed
Chr1	Streb.1G023880.1	WGD or Segmental
Chr1	Streb.1G027430.1	Dispersed
Chr1	Streb.1G029990.1	Dispersed
Chr1	Streb.1G035990.1	Proximal
Chr1	Streb.1G036060.1	Proximal
Chr1	Streb.1G050640.1	WGD or Segmental
Chr1	Streb.1G050880.1	WGD or Segmental
Chr2	Streb.2G000300.1	Dispersed
Chr2	Streb.2G001010.1	Dispersed
Chr2	Streb.2G002460.1	WGD or Segmental
Chr2	Streb.2G002660.1	WGD or Segmental
Chr2	Streb.2G012600.1	Dispersed
Chr2	Streb.2G013060.1	Proximal
Chr2	Streb.2G013100.1	Proximal
Chr2	Streb.2G017730.1	Dispersed
Chr2	Streb.2G036150.1	WGD or Segmental
Chr2	Streb.2G043690.1	Dispersed
Chr2	Streb.2G044080.1	WGD or Segmental
Chr2	Streb.2G044340.1	Proximal
Chr2	Streb.2G044370.1	Proximal
Chr2	Streb.2G045420.1	WGD or Segmental
Chr2	Streb.2G045590.1	WGD or Segmental
Chr2	Streb.2G045750.1	WGD or Segmental
Chr2	Streb.2G046520.1	WGD or Segmental
Chr2	Streb.2G047250.1	WGD or Segmental
Chr2	Streb.2G049130.1	WGD or Segmental
Chr2	Streb.2G058200.1	Dispersed
Chr2	Streb.2G058740.1	WGD or Segmental
Chr3	Streb.3G007530.1	WGD or Segmental
Chr3	Streb.3G007840.1	WGD or Segmental
Chr3	Streb.3G008130.1	WGD or Segmental
Chr3	Streb.3G008630.1	WGD or Segmental
Chr3	Streb.3G011120.1	WGD or Segmental
Chr3	Streb.3G012510.1	Dispersed
Chr3	Streb.3G020020.1	Proximal
Chr3	Streb.3G020060.1	Proximal
Chr3	Streb.3G021150.1	Proximal
Chr3	Streb.3G021180.1	Proximal
Chr3	Streb.3G021200.1	Proximal
Chr3	Streb.3G031640.1	Dispersed
Chr4	Streb.4G010130.1	Dispersed
Chr4	Streb.4G010840.1	WGD or Segmental
Chr4	Streb.4G011920.1	Dispersed
Chr4	Streb.4G016370.1	WGD or Segmental
Chr4	Streb.4G018140.1	WGD or Segmental
Chr4	Streb.4G018680.1	WGD or Segmental
Chr4	Streb.4G020480.1	WGD or Segmental
Chr4	Streb.4G021440.1	WGD or Segmental
Chr5	Streb.5G004740.1	Dispersed
Chr5	Streb.5G015740.1	Dispersed
Chr5	Streb.5G023990.1	WGD or Segmental
Chr5	Streb.5G027580.1	WGD or Segmental
Chr6	Streb.6G000950.1	Dispersed
Chr6	Streb.6G001650.1	WGD or Segmental
Chr6	Streb.6G004770.1	WGD or Segmental
Chr6	Streb.6G009510.1	Dispersed
Chr6	Streb.6G020290.1	WGD or Segmental
Chr6	Streb.6G025310.1	WGD or Segmental
Chr6	Streb.6G030450.1	Dispersed
Chr7	Streb.7G004160.1	Dispersed
Chr7	Streb.7G006650.1	Dispersed
Chr7	Streb.7G006760.1	Dispersed
Chr7	Streb.7G012790.1	Tandem
Chr7	Streb.7G012800.1	Tandem
Chr7	Streb.7G013610.1	Dispersed
Chr7	Streb.7G013650.1	Singleton
Chr7	Streb.7G014910.1	WGD or Segmental
Chr7	Streb.7G015520.1	WGD or Segmental
Chr7	Streb.7G016740.1	Dispersed
Chr7	Streb.7G020660.1	WGD or Segmental
Chr7	Streb.7G021050.1	WGD or Segmental
Chr7	Streb.7G027260.1	Dispersed
Chr8	Streb.8G007770.1	Singleton
Chr8	Streb.8G011540.1	Proximal
Chr8	Streb.8G011630.1	Proximal
Chr8	Streb.8G013110.1	Dispersed
Chr8	Streb.8G014850.1	Dispersed
Chr8	Streb.8G014960.1	Dispersed
Chr8	Streb.8G015740.1	Dispersed
Chr8	Streb.8G019610.1	Dispersed
Chr9	Streb.9G002160.1	WGD or Segmental
Chr9	Streb.9G003580.1	Dispersed
Chr9	Streb.9G007710.1	Dispersed
Chr9	Streb.9G008940.1	WGD or Segmental
Chr9	Streb.9G023690.1	WGD or Segmental
Chr9	Streb.9G026660.1	Dispersed
Chr9	Streb.9G027520.1	WGD or Segmental
Chr9	Streb.9G027550.1	Proximal
Chr10	Streb.10G008960.1	Dispersed
Chr10	Streb.10G010340.1	WGD or Segmental
Chr10	Streb.10G026000.1	Dispersed
Chr10	Streb.10G030660.1	WGD or Segmental
Chr11	Streb.11G004130.1	Proximal
Chr11	Streb.11G004220.1	Proximal
Chr11	Streb.11G006240.1	Dispersed
Chr11	Streb.11G009130.1	Dispersed
Chr11	Streb.11G010070.1	Dispersed
Chr11	Streb.11G012820.1	Dispersed
Chr11	Streb.11G016810.1	Dispersed
Chr11	Streb.11G019880.1	WGD or Segmental
Chr11	Streb.11G020140.1	Dispersed
Note:
#Singleton means that the gene is single-copy, which should not be the type of members of gene families.
# Dispersed means that the gene might arise from transposition, such as 'replicative transposition', 'non-replicative tranposition' or 'conservative tranpostion'
# Proximal means that the gene might arise from small-scale transposition or arise from tandem duplication and insertion of some other genes
# WGD or segmental means that the gene might arise from Whole Genome Duplication or Segmental Duplication.

## Sheet: S4
Table S4.The collinear analysis between S. rebaudiana and A. thaliana
At--1	At--transcript:AT1G08320.3	==	Sr--Chr10	Sr--Streb.10G026000.1
At--1	At--transcript:AT1G32150.1	==	Sr--Chr10	Sr--Streb.10G008960.1
At--1	At--transcript:AT1G75390.1	==	Sr--Chr2	Sr--Streb.2G049130.1
At--1	At--transcript:AT1G75390.1	==	Sr--Chr2	Sr--Streb.2G036150.1
At--1	At--transcript:AT1G22070.1	==	Sr--Chr2	Sr--Streb.2G058200.1
At--1	At--transcript:AT1G68640.1	==	Sr--Chr2	Sr--Streb.2G000300.1
At--1	At--transcript:AT1G75390.1	==	Sr--Chr4	Sr--Streb.4G021440.1
At--1	At--transcript:AT1G45249.6	==	Sr--Chr4	Sr--Streb.4G020480.1
At--1	At--transcript:AT1G68880.1	==	Sr--Chr4	Sr--Streb.4G016370.1
At--1	At--transcript:AT1G68880.1	==	Sr--Chr5	Sr--Streb.5G004740.1
At--1	At--transcript:AT1G43700.1	==	Sr--Chr5	Sr--Streb.5G023990.1
At--1	At--transcript:AT1G49720.2	==	Sr--Chr6	Sr--Streb.6G000950.1
At--1	At--transcript:AT1G77920.1	==	Sr--Chr7	Sr--Streb.7G013610.1
At--1	At--transcript:AT1G22070.1	==	Sr--Chr8	Sr--Streb.8G014960.1
At--2	At--transcript:AT2G22850.2	==	Sr--Chr1	Sr--Streb.1G015330.1
At--2	At--transcript:AT2G40620.1	==	Sr--Chr1	Sr--Streb.1G002080.1
At--2	At--transcript:AT2G21230.3	==	Sr--Chr11	Sr--Streb.11G020140.1
At--2	At--transcript:AT2G16770.1	==	Sr--Chr11	Sr--Streb.11G019880.1
At--2	At--transcript:AT2G16770.1	==	Sr--Chr2	Sr--Streb.2G002660.1
At--2	At--transcript:AT2G22850.2	==	Sr--Chr2	Sr--Streb.2G046520.1
At--2	At--transcript:AT2G16770.1	==	Sr--Chr2	Sr--Streb.2G002460.1
At--2	At--transcript:AT2G17770.3	==	Sr--Chr4	Sr--Streb.4G011920.1
At--2	At--transcript:AT2G18160.1	==	Sr--Chr4	Sr--Streb.4G021440.1
At--2	At--transcript:AT2G04038.1	==	Sr--Chr5	Sr--Streb.5G004740.1
At--2	At--transcript:AT2G18160.1	==	Sr--Chr5	Sr--Streb.5G027580.1
At--2	At--transcript:AT2G18160.1	==	Sr--Chr6	Sr--Streb.6G001650.1
At--2	At--transcript:AT2G46270.3	==	Sr--Chr6	Sr--Streb.6G030450.1
At--2	At--transcript:AT2G22850.2	==	Sr--Chr7	Sr--Streb.7G021050.1
At--2	At--transcript:AT2G40620.1	==	Sr--Chr8	Sr--Streb.8G019610.1
At--3	At--transcript:AT3G49760.1	==	Sr--Chr1	Sr--Streb.1G015330.1
At--3	At--transcript:AT3G49760.1	==	Sr--Chr2	Sr--Streb.2G046520.1
At--3	At--transcript:AT3G30530.1	==	Sr--Chr4	Sr--Streb.4G016370.1
At--3	At--transcript:AT3G49760.1	==	Sr--Chr4	Sr--Streb.4G018140.1
At--3	At--transcript:AT3G19290.3	==	Sr--Chr6	Sr--Streb.6G000950.1
At--3	At--transcript:AT3G62420.1	==	Sr--Chr6	Sr--Streb.6G025310.1
At--3	At--transcript:AT3G49760.1	==	Sr--Chr7	Sr--Streb.7G021050.1
At--3	At--transcript:AT3G62420.1	==	Sr--Chr9	Sr--Streb.9G002160.1
At--4	At--transcript:AT4G37730.1	==	Sr--Chr1	Sr--Streb.1G015330.1
At--4	At--transcript:AT4G38900.1	==	Sr--Chr11	Sr--Streb.11G020140.1
At--4	At--transcript:AT4G35040.3	==	Sr--Chr11	Sr--Streb.11G019880.1
At--4	At--transcript:AT4G37730.1	==	Sr--Chr2	Sr--Streb.2G046520.1
At--4	At--transcript:AT4G34590.1	==	Sr--Chr2	Sr--Streb.2G036150.1
At--4	At--transcript:AT4G35040.3	==	Sr--Chr2	Sr--Streb.2G002660.1
At--4	At--transcript:AT4G36730.1	==	Sr--Chr2	Sr--Streb.2G047250.1
At--4	At--transcript:AT4G35040.3	==	Sr--Chr2	Sr--Streb.2G002460.1
At--4	At--transcript:AT4G34000.2	==	Sr--Chr3	Sr--Streb.3G012510.1
At--4	At--transcript:AT4G35900.1	==	Sr--Chr4	Sr--Streb.4G011920.1
At--4	At--transcript:AT4G37730.1	==	Sr--Chr4	Sr--Streb.4G018140.1
At--4	At--transcript:AT4G36730.1	==	Sr--Chr4	Sr--Streb.4G018680.1
At--4	At--transcript:AT4G34590.1	==	Sr--Chr5	Sr--Streb.5G027580.1
At--4	At--transcript:AT4G01120.1	==	Sr--Chr6	Sr--Streb.6G030450.1
At--4	At--transcript:AT4G34590.1	==	Sr--Chr6	Sr--Streb.6G001650.1
At--4	At--transcript:AT4G34000.2	==	Sr--Chr6	Sr--Streb.6G000950.1
At--4	At--transcript:AT4G37730.1	==	Sr--Chr7	Sr--Streb.7G021050.1
At--4	At--transcript:AT4G01120.1	==	Sr--Chr9	Sr--Streb.9G003580.1
At--5	At--transcript:AT5G15830.1	==	Sr--Chr2	Sr--Streb.2G045750.1
At--5	At--transcript:AT5G15830.1	==	Sr--Chr4	Sr--Streb.4G016370.1
At--5	At--transcript:AT5G38800.1	==	Sr--Chr4	Sr--Streb.4G016370.1
At--5	At--transcript:AT5G42910.1	==	Sr--Chr4	Sr--Streb.4G020480.1
At--5	At--transcript:AT5G11260.2	==	Sr--Chr5	Sr--Streb.5G015740.1
At--5	At--transcript:AT5G06839.3	==	Sr--Chr8	Sr--Streb.8G011630.1
At--5	At--transcript:AT5G49450.1	==	Sr--Chr9	Sr--Streb.9G002160.1

## Sheet: S5
Table S5. Cis-acting elements for SrbZIP promoters
ID	cis-acting element	sequence	annotation
Streb.10G008960.1	CGTCA-motif	CGTCA	cis-acting regulatory element involved in the MeJA-responsiveness
Streb.10G008960.1	CGTCA-motif	ATTAAT	cis-acting regulatory element involved in the MeJA-responsiveness
Streb.10G008960.1	Box 4	ATTAAT	cis-acting regulatory element involved in the MeJA-responsiveness
Streb.10G008960.1	Box 4	ATTAAT	part of a conserved DNA module involved in light responsiveness
Streb.10G008960.1	Box 4	ATTAAT	part of a conserved DNA module involved in light responsiveness
Streb.10G008960.1	Box 4	ATTAAT	part of a conserved DNA module involved in light responsiveness
Streb.10G008960.1	Box 4	ATTAAT	part of a conserved DNA module involved in light responsiveness
Streb.10G008960.1	Box 4	GCAACGTGTC	part of a conserved DNA module involved in light responsiveness
Streb.10G008960.1	ABRE	ACGTG	part of a conserved DNA module involved in light responsiveness
Streb.10G008960.1	ABRE	CACGTG	cis-acting element involved in the abscisic acid responsiveness
Streb.10G008960.1	ABRE	ACGTG	cis-acting element involved in the abscisic acid responsiveness
Streb.10G008960.1	ABRE	ATTATA	cis-acting element involved in the abscisic acid responsiveness
Streb.10G008960.1	G-Box	CACGTG	cis-acting element involved in the abscisic acid responsiveness
Streb.10G008960.1	G-Box	CCAAT	cis-acting regulatory element involved in light responsiveness
Streb.10G008960.1	CAAT-box	TAACACGTAG	cis-acting regulatory element involved in light responsiveness
Streb.10G008960.1	G-box	CACGAC	cis-acting regulatory element involved in light responsiveness
Streb.10G008960.1	G-box	CACGTG	cis-acting regulatory element involved in light responsiveness
Streb.10G008960.1	G-box	CAACTG	cis-acting regulatory element involved in light responsiveness
Streb.10G008960.1	MBS	CAACTG	cis-acting regulatory element involved in light responsiveness
Streb.10G008960.1	MBS	motif_sequence	MYB binding site involved in drought-inducibility
Streb.10G008960.1	TCT-motif	TCTTAC	MYB binding site involved in drought-inducibility
Streb.10G008960.1	TCT-motif	TCTTAC	part of a light responsive element
Streb.10G008960.1	TCT-motif	CCATCTTTTT	part of a light responsive element
Streb.10G008960.1	TCA-element	CCGTCC	part of a light responsive element
Streb.10G008960.1	A-box	AACCTAA	cis-acting element involved in salicylic acid responsiveness
Streb.10G008960.1	GT1-motif	GGTTAA	MYB binding site involved in light responsiveness
Streb.10G008960.1	GT1-motif	GGTTAA	light responsive element
Streb.10G008960.1	GT1-motif	GGTTAA	light responsive element
Streb.10G008960.1	GT1-motif	TGACG	light responsive element
Streb.10G008960.1	TGACG-motif	TGACG	light responsive element
Streb.10G008960.1	TGACG-motif	TGACG	cis-acting regulatory element involved in the MeJA-responsiveness
Streb.10G008960.1	TGACG-motif	motif_sequence	cis-acting regulatory element involved in the MeJA-responsiveness
Streb.10G010340.1	ATC-motif	CCGAAA	cis-acting regulatory element involved in the MeJA-responsiveness
Streb.10G010340.1	LTR	AACGAC	part of a conserved DNA module involved in light responsiveness
Streb.10G010340.1	TGA-element	TGAGTCA	cis-acting element involved in low-temperature responsiveness
Streb.10G010340.1	GCN4_motif	TGAGTCA	auxin-responsive element
Streb.10G010340.1	GCN4_motif	CCATCTTTTT	cis-regulatory element involved in endosperm expression
Streb.10G010340.1	TCA-element	TCAGAAGAGG	cis-regulatory element involved in endosperm expression
Streb.10G010340.1	TCA-element	CCACGTGGC	cis-acting element involved in salicylic acid responsiveness
Streb.10G010340.1	Box II	CCACGTGGC	cis-acting element involved in salicylic acid responsiveness
Streb.10G010340.1	Box II	CCACGTGGC	part of a light responsive element
Streb.10G010340.1	Box II	CCACGTGGC	part of a light responsive element
Streb.10G010340.1	Box II	TGGTAATAA	part of a light responsive element
Streb.10G010340.1	Box II	AATCTAATCC	part of a light responsive element
Streb.10G010340.1	ATCT-motif	CCCCCG	part of a light responsive element
Streb.10G010340.1	GC-motif	CAACGG	part of a conserved DNA module involved in light responsiveness
Streb.10G010340.1	CCAAT-box	TGACG	enhancer-like element involved in anoxic specific inducibility
Streb.10G010340.1	TGACG-motif	TGACG	MYBHv1 binding site
Streb.10G010340.1	TGACG-motif	TGACG	cis-acting regulatory element involved in the MeJA-responsiveness
Streb.10G010340.1	TGACG-motif	TGACG	cis-acting regulatory element involved in the MeJA-responsiveness
Streb.10G010340.1	TGACG-motif	GGTTAA	cis-acting regulatory element involved in the MeJA-responsiveness
Streb.10G010340.1	GT1-motif	GGTTAA	cis-acting regulatory element involved in the MeJA-responsiveness
Streb.10G010340.1	GT1-motif	GGTTAA	light responsive element
Streb.10G010340.1	GT1-motif	CGTCA	light responsive element
Streb.10G010340.1	CGTCA-motif	CGTCA	light responsive element
Streb.10G010340.1	CGTCA-motif	CGTCA	cis-acting regulatory element involved in the MeJA-responsiveness
Streb.10G010340.1	CGTCA-motif	CGTCA	cis-acting regulatory element involved in the MeJA-responsiveness
Streb.10G010340.1	CGTCA-motif	AAACCA	cis-acting regulatory element involved in the MeJA-responsiveness
Streb.10G010340.1	ARE	AAACCA	cis-acting regulatory element involved in the MeJA-responsiveness
Streb.10G010340.1	ARE	GCAACGTGTC	cis-acting regulatory element essential for the anaerobic induction
Streb.10G010340.1	ABRE	CACGTG	cis-acting regulatory element essential for the anaerobic induction
Streb.10G010340.1	ABRE	ACGTG	cis-acting element involved in the abscisic acid responsiveness
Streb.10G010340.1	ABRE	GCCGCGTGGC	cis-acting element involved in the abscisic acid responsiveness
Streb.10G010340.1	ABRE	CACGTG	cis-acting element involved in the abscisic acid responsiveness
Streb.10G010340.1	ABRE	ACGTG	cis-acting element involved in the abscisic acid responsiveness
Streb.10G010340.1	ABRE	ACGTG	cis-acting element involved in the abscisic acid responsiveness
Streb.10G010340.1	ABRE	GCCGCGTGGC	cis-acting element involved in the abscisic acid responsiveness
Streb.10G010340.1	ABRE	CACGTG	cis-acting element involved in the abscisic acid responsiveness
Streb.10G010340.1	ABRE	ACGTG	cis-acting element involved in the abscisic acid responsiveness
Streb.10G010340.1	ABRE	ACGTG	cis-acting element involved in the abscisic acid responsiveness
Streb.10G010340.1	ABRE	GCAACGTGTC	cis-acting element involved in the abscisic acid responsiveness
Streb.10G010340.1	ABRE	ACGTG	cis-acting element involved in the abscisic acid responsiveness
Streb.10G010340.1	ABRE	ACGTG	cis-acting element involved in the abscisic acid responsiveness
Streb.10G010340.1	ABRE	GATAGGA	cis-acting element involved in the abscisic acid responsiveness
Streb.10G010340.1	GATA-motif	TCTGTTG	cis-acting element involved in the abscisic acid responsiveness
Streb.10G010340.1	GARE-motif	CCTTTTG	part of a light responsive element
Streb.10G010340.1	P-box	CACGTG	gibberellin-responsive element
Streb.10G010340.1	G-Box	CACGTG	gibberellin-responsive element
Streb.10G010340.1	G-Box	CACGTG	cis-acting regulatory element involved in light responsiveness
Streb.10G010340.1	G-Box	CACGTT	cis-acting regulatory element involved in light responsiveness
Streb.10G010340.1	G-Box	CCAAT	cis-acting regulatory element involved in light responsiveness
Streb.10G010340.1	CAAT-box	ACACGTGGC	cis-acting regulatory element involved in light responsiveness
Streb.10G010340.1	G-box	CACGTG	cis-acting regulatory element involved in light responsiveness
Streb.10G010340.1	G-box	GCCACGTGGA	cis-acting regulatory element involved in light responsiveness
Streb.10G010340.1	G-box	CACGTG	cis-acting regulatory element involved in light responsiveness
Streb.10G010340.1	G-box	TACGTG	cis-acting regulatory element involved in light responsiveness
Streb.10G010340.1	G-box	tgACACGTGGCA	cis-acting regulatory element involved in light responsiveness
Streb.10G010340.1	G-box	GCCACGTGGA	cis-acting regulatory element involved in light responsiveness
Streb.10G010340.1	G-box	CACGTG	cis-acting regulatory element involved in light responsiveness
Streb.10G010340.1	G-box	TACGTG	cis-acting regulatory element involved in light responsiveness
Streb.10G010340.1	G-box	CACGAC	cis-acting regulatory element involved in light responsiveness
Streb.10G010340.1	G-box	TACGTG	cis-acting regulatory element involved in light responsiveness
Streb.10G010340.1	G-box	CAACTG	cis-acting regulatory element involved in light responsiveness
Streb.10G010340.1	MBS	CTTTACCAACCCCC	cis-acting regulatory element involved in light responsiveness
Streb.10G010340.1	4cl-CMA1c	ATAGAAATCAA	MYB binding site involved in drought-inducibility
Streb.10G026000.1	AT-rich element	CCATCTTTTT	light responsive element
Streb.10G026000.1	TCA-element	CCATCTTTTT	binding site of AT-rich DNA binding protein (ATBP-1)
Streb.10G026000.1	TCA-element	TCTTAC	cis-acting element involved in salicylic acid responsiveness
Streb.10G026000.1	TCT-motif	TCTTAC	cis-acting element involved in salicylic acid responsiveness
Streb.10G026000.1	TCT-motif	motif_sequence	part of a light responsive element
Streb.10G026000.1	AACA_motif	CCGAAA	part of a light responsive element
Streb.10G026000.1	LTR	AACGAC	involved in endosperm-specific negative expression
Streb.10G026000.1	TGA-element	GTTTTCTTAC	cis-acting element involved in low-temperature responsiveness
Streb.10G026000.1	TC-rich repeats	ATTCTCTAAC	auxin-responsive element
Streb.10G026000.1	TC-rich repeats	ATAGATAA	cis-acting element involved in defense and stress responsiveness
Streb.10G026000.1	GA-motif	GGTTAA	cis-acting element involved in defense and stress responsiveness
Streb.10G026000.1	GT1-motif	AAACCA	part of a light responsive element
Streb.10G026000.1	ARE	AAACCA	light responsive element
Streb.10G026000.1	ARE	AACCCGG	cis-acting regulatory element essential for the anaerobic induction
Streb.10G026000.1	ABRE	ATTAAT	cis-acting regulatory element essential for the anaerobic induction
Streb.10G026000.1	Box 4	ATTAAT	cis-acting element involved in the abscisic acid responsiveness
Streb.10G026000.1	Box 4	ATTAAT	part of a conserved DNA module involved in light responsiveness
Streb.10G026000.1	Box 4	AGAAACAA	part of a conserved DNA module involved in light responsiveness
Streb.10G026000.1	AE-box	CAAAGATATC	part of a conserved DNA module involved in light responsiveness
Streb.10G026000.1	circadian	CAAAGATATC	part of a module for light response
Streb.10G026000.1	circadian	CAAAT	cis-acting regulatory element involved in circadian control
Streb.10G026000.1	CAAT-box	CGCACGTGTC	cis-acting regulatory element involved in circadian control
Streb.10G030660.1	ABRE	CACGTG	cis-acting element involved in the abscisic acid responsiveness
Streb.10G030660.1	ABRE	ACGTG	cis-acting element involved in the abscisic acid responsiveness
Streb.10G030660.1	ABRE	ACGTG	cis-acting element involved in the abscisic acid responsiveness
Streb.10G030660.1	ABRE	GAATTTAATTAA	cis-acting element involved in the abscisic acid responsiveness
Streb.10G030660.1	GCN4_motif	AAACCA	cis-acting element involved in the abscisic acid responsiveness
Streb.10G030660.1	ARE	AAACCA	cis-regulatory element involved in endosperm expression
Streb.10G030660.1	ARE	CGTCA	cis-acting regulatory element essential for the anaerobic induction
Streb.10G030660.1	CGTCA-motif	CGTCA	cis-acting regulatory element essential for the anaerobic induction
Streb.10G030660.1	CGTCA-motif	CGTCA	cis-acting regulatory element involved in the MeJA-responsiveness
Streb.10G030660.1	CGTCA-motif	CGTCA	cis-acting regulatory element involved in the MeJA-responsiveness
Streb.10G030660.1	CGTCA-motif	CGTCA	cis-acting regulatory element involved in the MeJA-responsiveness
Streb.10G030660.1	CGTCA-motif	CCGAAA	cis-acting regulatory element involved in the MeJA-responsiveness
Streb.10G030660.1	LTR	TCCAACGGT	cis-acting regulatory element involved in the MeJA-responsiveness
Streb.10G030660.1	MSA-like	ATTAAT	cis-acting element involved in low-temperature responsiveness
Streb.10G030660.1	Box 4	ATTAAT	cis-acting element involved in cell cycle regulation
Streb.10G030660.1	Box 4	GGGCGG	part of a conserved DNA module involved in light responsiveness
Streb.10G030660.1	Sp1	motif_sequence	part of a conserved DNA module involved in light responsiveness
Streb.10G030660.1	AACA_motif	CAACGG	light responsive element
Streb.10G030660.1	CCAAT-box	CAACGG	involved in endosperm-specific negative expression
Streb.10G030660.1	CCAAT-box	GGTTAA	MYBHv1 binding site
Streb.10G030660.1	GT1-motif	GGTTAAT	MYBHv1 binding site
Streb.10G030660.1	GT1-motif	GGTTAA	light responsive element
Streb.10G030660.1	GT1-motif	atCATTTTCACt	light responsive element
Streb.10G030660.1	Box III	TGACG	light responsive element
Streb.10G030660.1	TGACG-motif	TGACG	protein binding site
Streb.10G030660.1	TGACG-motif	TGACG	cis-acting regulatory element involved in the MeJA-responsiveness
Streb.10G030660.1	TGACG-motif	TGACG	cis-acting regulatory element involved in the MeJA-responsiveness
Streb.10G030660.1	TGACG-motif	TGACG	cis-acting regulatory element involved in the MeJA-responsiveness
Streb.10G030660.1	TGACG-motif	tgACACGTGGCA	cis-acting regulatory element involved in the MeJA-responsiveness
Streb.10G030660.1	G-box	CACGTG	cis-acting regulatory element involved in the MeJA-responsiveness
Streb.10G030660.1	G-box	TACGTG	cis-acting regulatory element involved in light responsiveness
Streb.10G030660.1	G-box	CACGTG	cis-acting regulatory element involved in light responsiveness
Streb.10G030660.1	G-Box	CAAAT	cis-acting regulatory element involved in light responsiveness
Streb.10G030660.1	CAAT-box	CCGTCC	cis-acting regulatory element involved in light responsiveness
Streb.10G030660.1	A-box	GGTCCAT	cis-acting regulatory element related to meristem expression
Streb.11G004130.1	AuxRR-core	GATGACATGG	cis-acting regulatory element
Streb.11G004130.1	O2-site	CACGTC	cis-acting regulatory element involved in auxin responsiveness
Streb.11G004130.1	G-box	CACGAC	cis-acting regulatory element involved in zein metabolism regulation
Streb.11G004130.1	G-box	CAACTG	cis-acting regulatory element involved in light responsiveness
Streb.11G004130.1	MBS	CAACTG	cis-acting regulatory element involved in light responsiveness
Streb.11G004130.1	MBS	CAACGG	MYB binding site involved in drought-inducibility
Streb.11G004130.1	CCAAT-box	TTTTTACGGTTA	MYB binding site involved in drought-inducibility
Streb.11G004130.1	MBSI	GGTTAAT	MYBHv1 binding site
Streb.11G004130.1	GT1-motif	GGTTAA	MYB binding site involved in flavonoid biosynthetic genes regulation
Streb.11G004130.1	GT1-motif	TGACG	light responsive element
Streb.11G004130.1	TGACG-motif	TGACG	light responsive element
Streb.11G004130.1	TGACG-motif	AATCTAATCC	cis-acting regulatory element involved in the MeJA-responsiveness
Streb.11G004130.1	ATCT-motif	AACCTAA	cis-acting regulatory element involved in the MeJA-responsiveness
Streb.11G004130.1	MRE	AACCTAA	part of a conserved DNA module involved in light responsiveness
Streb.11G004130.1	MRE	AACCTAA	MYB binding site involved in light responsiveness
Streb.11G004130.1	MRE	CCAAT	MYB binding site involved in light responsiveness
Streb.11G004130.1	CAAT-box	GCCACT	MYB binding site involved in light responsiveness
Streb.11G004130.1	CAT-box	AAACCA	cis-acting regulatory element related to meristem expression
Streb.11G004130.1	ARE	TACGGTC	cis-acting regulatory element related to meristem expression
Streb.11G004130.1	ABRE	ACGTG	cis-acting regulatory element essential for the anaerobic induction
Streb.11G004130.1	ABRE	AAGATAAGATT	cis-acting element involved in the abscisic acid responsiveness
Streb.11G004130.1	GATA-motif	GATAGGA	cis-acting element involved in the abscisic acid responsiveness
Streb.11G004130.1	GATA-motif	ATTAAT	part of a light responsive element
Streb.11G004130.1	Box 4	ATTAAT	part of a light responsive element
Streb.11G004130.1	Box 4	TAACAAACTCCA	part of a conserved DNA module involved in light responsiveness
Streb.11G004130.1	AACA_motif	motif_sequence	part of a conserved DNA module involved in light responsiveness
Streb.11G004130.1	CGTCA-motif	CGTCA	involved in endosperm-specific negative expression
Streb.11G004130.1	CGTCA-motif	CAACGG	cis-acting regulatory element involved in the MeJA-responsiveness
Streb.11G004220.1	CCAAT-box	TTTTTACGGTTA	cis-acting regulatory element involved in the MeJA-responsiveness
Streb.11G004220.1	MBSI	GGTTAA	MYBHv1 binding site
Streb.11G004220.1	GT1-motif	TGACG	MYB binding site involved in flavonoid biosynthetic genes regulation
Streb.11G004220.1	TGACG-motif	GGTCCAT	light responsive element
Streb.11G004220.1	AuxRR-core	GATGATGTGG	cis-acting regulatory element involved in the MeJA-responsiveness
Streb.11G004220.1	O2-site	GATGACATGG	cis-acting regulatory element involved in auxin responsiveness
Streb.11G004220.1	O2-site	CACGTC	cis-acting regulatory element involved in zein metabolism regulation
Streb.11G004220.1	G-box	CAACTG	cis-acting regulatory element involved in zein metabolism regulation
Streb.11G004220.1	MBS	CAAAT	cis-acting regulatory element involved in light responsiveness
Streb.11G004220.1	CAAT-box	GCCACT	MYB binding site involved in drought-inducibility
Streb.11G004220.1	CAT-box	AACCTAA	cis-acting regulatory element related to meristem expression
Streb.11G004220.1	MRE	AACCTAA	cis-acting regulatory element related to meristem expression
Streb.11G004220.1	MRE	AATCTAATCC	MYB binding site involved in light responsiveness
Streb.11G004220.1	ATCT-motif	TACGGTC	MYB binding site involved in light responsiveness
Streb.11G004220.1	ABRE	ACGTG	part of a conserved DNA module involved in light responsiveness
Streb.11G004220.1	ABRE	TCTTAC	cis-acting element involved in the abscisic acid responsiveness
Streb.11G004220.1	TCT-motif	TCTTAC	cis-acting element involved in the abscisic acid responsiveness
Streb.11G004220.1	TCT-motif	GATAGGA	part of a light responsive element
Streb.11G004220.1	GATA-motif	AAACCA	part of a light responsive element
Streb.11G004220.1	ARE	CGTCA	part of a light responsive element
Streb.11G004220.1	CGTCA-motif	ATTAAT	cis-acting regulatory element essential for the anaerobic induction
Streb.11G004220.1	Box 4	motif_sequence	cis-acting regulatory element involved in the MeJA-responsiveness
Streb.11G006240.1	ARE	AAACCA	part of a conserved DNA module involved in light responsiveness
Streb.11G006240.1	ARE	TGAGTCA	cis-acting regulatory element essential for the anaerobic induction
Streb.11G006240.1	GCN4_motif	CCATCTTTTT	cis-acting regulatory element essential for the anaerobic induction
Streb.11G006240.1	TCA-element	TCTTAC	cis-regulatory element involved in endosperm expression
Streb.11G006240.1	TCT-motif	ACGTG	cis-acting element involved in salicylic acid responsiveness
Streb.11G006240.1	ABRE	TCTGTTG	part of a light responsive element
Streb.11G006240.1	GARE-motif	ATTAAT	cis-acting element involved in the abscisic acid responsiveness
Streb.11G006240.1	Box 4	ATTAAT	gibberellin-responsive element
Streb.11G006240.1	Box 4	motif_sequence	part of a conserved DNA module involved in light responsiveness
Streb.11G006240.1	HD-Zip 3	CGTCA	part of a conserved DNA module involved in light responsiveness
Streb.11G006240.1	CGTCA-motif	CGTCA	protein binding site
Streb.11G006240.1	CGTCA-motif	CGTCA	cis-acting regulatory element involved in the MeJA-responsiveness
Streb.11G006240.1	CGTCA-motif	CGTCA	cis-acting regulatory element involved in the MeJA-responsiveness
Streb.11G006240.1	CGTCA-motif	GATGA(C/T)(A/G)TG(A/G)	cis-acting regulatory element involved in the MeJA-responsiveness
Streb.11G006240.1	O2-site	TACGTG	cis-acting regulatory element involved in the MeJA-responsiveness
Streb.11G006240.1	G-box	ATAGATAA	cis-acting regulatory element involved in zein metabolism regulation
Streb.11G006240.1	GA-motif	CAACTG	cis-acting regulatory element involved in light responsiveness
Streb.11G006240.1	MBS	CAACGG	part of a light responsive element
Streb.11G006240.1	CCAAT-box	TGACG	MYB binding site involved in drought-inducibility
Streb.11G006240.1	TGACG-motif	TGACG	MYBHv1 binding site
Streb.11G006240.1	TGACG-motif	TGACG	cis-acting regulatory element involved in the MeJA-responsiveness
Streb.11G006240.1	TGACG-motif	TGACG	cis-acting regulatory element involved in the MeJA-responsiveness
Streb.11G006240.1	TGACG-motif	TGACGTAA	cis-acting regulatory element involved in the MeJA-responsiveness
Streb.11G006240.1	TGA-box	TAAAATACT	cis-acting regulatory element involved in the MeJA-responsiveness
Streb.11G006240.1	AT-rich sequence	GGTTAA	part of an auxin-responsive element
Streb.11G006240.1	GT1-motif	CCGTCC	element for maximal elicitor-mediated activation (2copies)
Streb.11G006240.1	A-box	CCGTCC	light responsive element
Streb.11G006240.1	A-box	CCTTTTG	cis-acting regulatory element
Streb.11G006240.1	P-box	CCAAT	cis-acting regulatory element
Streb.11G006240.1	CAAT-box	AAACCA	gibberellin-responsive element
Streb.11G009130.1	ARE	AAACCA	cis-acting regulatory element essential for the anaerobic induction
Streb.11G009130.1	ARE	TATCCCA	cis-acting regulatory element essential for the anaerobic induction
Streb.11G009130.1	TATC-box	ATTAAT	cis-acting regulatory element essential for the anaerobic induction
Streb.11G009130.1	Box 4	ATTAAT	cis-acting element involved in gibberellin-responsiveness
Streb.11G009130.1	Box 4	ATTAAT	part of a conserved DNA module involved in light responsiveness
Streb.11G009130.1	Box 4	CGTCA	part of a conserved DNA module involved in light responsiveness
Streb.11G009130.1	CGTCA-motif	CGTCA	part of a conserved DNA module involved in light responsiveness
Streb.11G009130.1	CGTCA-motif	CGTCA	cis-acting regulatory element involved in the MeJA-responsiveness
Streb.11G009130.1	CGTCA-motif	CGTCA	cis-acting regulatory element involved in the MeJA-responsiveness
Streb.11G009130.1	CGTCA-motif	CGTCA	cis-acting regulatory element involved in the MeJA-responsiveness
Streb.11G009130.1	CGTCA-motif	ATTCTCTAAC	cis-acting regulatory element involved in the MeJA-responsiveness
Streb.11G009130.1	TC-rich repeats	GGTTAAT	cis-acting regulatory element involved in the MeJA-responsiveness
Streb.11G009130.1	GT1-motif	GGTTAA	cis-acting element involved in defense and stress responsiveness
Streb.11G009130.1	GT1-motif	TGACG	light responsive element
Streb.11G009130.1	TGACG-motif	TGACG	light responsive element
Streb.11G009130.1	TGACG-motif	TGACG	cis-acting regulatory element involved in the MeJA-responsiveness
Streb.11G009130.1	TGACG-motif	TGACG	cis-acting regulatory element involved in the MeJA-responsiveness
Streb.11G009130.1	TGACG-motif	TGACG	cis-acting regulatory element involved in the MeJA-responsiveness
Streb.11G009130.1	TGACG-motif	TCTCCCT	cis-acting regulatory element involved in the MeJA-responsiveness
Streb.11G009130.1	TCCC-motif	TGACGTAA	cis-acting regulatory element involved in the MeJA-responsiveness
Streb.11G009130.1	TGA-box	CCGTCC	part of a light responsive element
Streb.11G009130.1	A-box	CCGTCC	part of an auxin-responsive element
Streb.11G009130.1	A-box	GCCACT	cis-acting regulatory element
Streb.11G009130.1	CAT-box	attctcaCCTACCA	cis-acting regulatory element
Streb.11G009130.1	L-box	TCTTAC	cis-acting regulatory element related to meristem expression
Streb.11G009130.1	TCT-motif	TCCGTGTACCA	part of a light responsive element
Streb.11G009130.1	Box II -like sequence	motif_sequence	part of a light responsive element
Streb.11G009130.1	ATC-motif	ATTCTCTAAC	cis-acting regulatory element
Streb.11G010070.1	TC-rich repeats	tgACACGTGGCA	part of a conserved DNA module involved in light responsiveness
Streb.11G010070.1	G-box	ACACGTGGC	cis-acting element involved in defense and stress responsiveness
Streb.11G010070.1	G-box	ACACGTG(G/t)CACC	cis-acting regulatory element involved in light responsiveness
Streb.11G010070.1	G-box	CACGTG	cis-acting regulatory element involved in light responsiveness
Streb.11G010070.1	G-box	tgACACGTGGCA	cis-acting regulatory element involved in light responsiveness
Streb.11G010070.1	G-box	CACGTG	cis-acting regulatory element involved in light responsiveness
Streb.11G010070.1	G-box	ATAGATAA	cis-acting regulatory element involved in light responsiveness
Streb.11G010070.1	GA-motif	CAACGG	cis-acting regulatory element involved in light responsiveness
Streb.11G010070.1	CCAAT-box	CAACGG	part of a light responsive element
Streb.11G010070.1	CCAAT-box	GGTTAA	MYBHv1 binding site
Streb.11G010070.1	GT1-motif	CCAAT	MYBHv1 binding site
Streb.11G010070.1	CAAT-box	CACGTG	light responsive element
Streb.11G010070.1	G-Box	GTATAAGGCC	cis-acting regulatory element involved in light responsiveness
Streb.11G010070.1	I-box	TATAAGAA	cis-acting regulatory element involved in light responsiveness
Streb.11G010070.1	GCN4_motif	AAACCA	part of a light responsive element
Streb.11G010070.1	ARE	AAACCA	cis-regulatory element involved in endosperm expression
Streb.11G010070.1	ARE	GCAACGTGTC	cis-acting regulatory element essential for the anaerobic induction
Streb.11G010070.1	ABRE	CACGTG	cis-acting regulatory element essential for the anaerobic induction
Streb.11G010070.1	ABRE	ACGTG	cis-acting element involved in the abscisic acid responsiveness
Streb.11G010070.1	ABRE	GACACGTGGC	cis-acting element involved in the abscisic acid responsiveness
Streb.11G010070.1	ABRE	CACGTG	cis-acting element involved in the abscisic acid responsiveness
Streb.11G010070.1	ABRE	ACGTG	cis-acting element involved in the abscisic acid responsiveness
Streb.11G010070.1	ABRE	TTACTTAA	cis-acting element involved in the abscisic acid responsiveness
Streb.11G010070.1	chs-CMA1a	AAGATAAGATT	cis-acting element involved in the abscisic acid responsiveness
Streb.11G010070.1	GATA-motif	ATTAAT	part of a light responsive element
Streb.11G010070.1	Box 4	ATTAAT	part of a light responsive element
Streb.11G010070.1	Box 4	motif_sequence	part of a conserved DNA module involved in light responsiveness
Streb.11G010070.1	TGA-element	ATTAAT	part of a conserved DNA module involved in light responsiveness
Streb.11G012820.1	Box 4	ATTAAT	auxin-responsive element
Streb.11G012820.1	Box 4	ATTAAT	part of a conserved DNA module involved in light responsiveness
Streb.11G012820.1	Box 4	ATTAAT	part of a conserved DNA module involved in light responsiveness
Streb.11G012820.1	Box 4	motif_sequence	part of a conserved DNA module involved in light responsiveness
Streb.11G012820.1	CGTCA-motif	CGTCA	part of a conserved DNA module involved in light responsiveness
Streb.11G012820.1	CGTCA-motif	AAACCA	cis-acting regulatory element involved in the MeJA-responsiveness
Streb.11G012820.1	ARE	CCATCTTTTT	cis-acting regulatory element involved in the MeJA-responsiveness
Streb.11G012820.1	TCA-element	ACGTG	cis-acting regulatory element essential for the anaerobic induction
Streb.11G012820.1	ABRE	ACGTG	cis-acting element involved in salicylic acid responsiveness
Streb.11G012820.1	ABRE	GATAGGA	cis-acting element involved in the abscisic acid responsiveness
Streb.11G012820.1	GATA-motif	GATAGGG	cis-acting element involved in the abscisic acid responsiveness
Streb.11G012820.1	GATA-motif	CCGTCC	part of a light responsive element
Streb.11G012820.1	A-box	CAAAT	part of a light responsive element
Streb.11G012820.1	CAAT-box	TACGTG	cis-acting regulatory element
Streb.11G012820.1	G-box	TACGTG	cis-acting regulatory element involved in light responsiveness
Streb.11G012820.1	G-box	GATGACATGG	cis-acting regulatory element involved in light responsiveness
Streb.11G012820.1	O2-site	CTTTATCA	cis-acting regulatory element involved in light responsiveness
Streb.11G012820.1	LAMP-element	TGACG	cis-acting regulatory element involved in zein metabolism regulation
Streb.11G012820.1	TGACG-motif	TGACG	part of a light responsive element
Streb.11G012820.1	TGACG-motif	TCTCCCT	cis-acting regulatory element involved in the MeJA-responsiveness
Streb.11G012820.1	TCCC-motif	ATATAT	cis-acting regulatory element involved in the MeJA-responsiveness
Streb.11G016810.1	CAAT-box	TGACG	part of a light responsive element
Streb.11G016810.1	TGACG-motif	GGTTAAT	cis-acting regulatory element involved in the MeJA-responsiveness
Streb.11G016810.1	GT1-motif	GGTTAAT	cis-acting regulatory element involved in the MeJA-responsiveness
Streb.11G016810.1	GT1-motif	GTGTGTGAA	light responsive element
Streb.11G016810.1	GT1-motif	ATAGATAA	light responsive element
Streb.11G016810.1	GA-motif	ATAGATAA	light responsive element
Streb.11G016810.1	GA-motif	GATGATGTGG	part of a light responsive element
Streb.11G016810.1	O2-site	CAACTG	part of a light responsive element
Streb.11G016810.1	MBS	ATTCTCTAAC	cis-acting regulatory element involved in zein metabolism regulation
Streb.11G016810.1	TC-rich repeats	CCGAAA	MYB binding site involved in drought-inducibility
Streb.11G016810.1	LTR	CGTCA	cis-acting element involved in defense and stress responsiveness
Streb.11G016810.1	CGTCA-motif	CGTCA	cis-acting element involved in low-temperature responsiveness
Streb.11G016810.1	CGTCA-motif	motif_sequence	cis-acting regulatory element involved in the MeJA-responsiveness
Streb.11G016810.1	AE-box	ATTAAT	cis-acting regulatory element involved in the MeJA-responsiveness
Streb.11G016810.1	Box 4	ATTAAT	part of a module for light response
Streb.11G016810.1	Box 4	TTACTTAA	part of a conserved DNA module involved in light responsiveness
Streb.11G016810.1	chs-CMA1a	TTACTTAA	part of a conserved DNA module involved in light responsiveness
Streb.11G016810.1	chs-CMA1a	TCTTAC	part of a light responsive element
Streb.11G016810.1	TCT-motif	CCATCTTTTT	part of a light responsive element
Streb.11G016810.1	TCA-element	AAACCA	part of a light responsive element
Streb.11G016810.1	ARE	TAAGAGAGGAA	cis-acting element involved in salicylic acid responsiveness
Streb.11G016810.1	3-AF1 binding site	TATA	cis-acting regulatory element essential for the anaerobic induction
Streb.11G019880.1	CAAT-box	CACGTGAAA	light responsive element
Streb.11G019880.1	G-Box	CACGTG	cis-acting regulatory element involved in light responsiveness
Streb.11G019880.1	G-Box	GGTCCAT	cis-acting regulatory element involved in light responsiveness
Streb.11G019880.1	AuxRR-core	CAACTG	cis-acting regulatory element involved in light responsiveness
Streb.11G019880.1	MBS	CACGTC	cis-acting regulatory element involved in auxin responsiveness
Streb.11G019880.1	G-box	CACGTG	MYB binding site involved in drought-inducibility
Streb.11G019880.1	G-box	CACGTG	cis-acting regulatory element involved in light responsiveness
Streb.11G019880.1	G-box	TACGTG	cis-acting regulatory element involved in light responsiveness
Streb.11G019880.1	G-box	CGTCA	cis-acting regulatory element involved in light responsiveness
Streb.11G019880.1	CGTCA-motif	ATTAAT	cis-acting regulatory element involved in light responsiveness
Streb.11G019880.1	Box 4	TCTGTTG	cis-acting regulatory element involved in the MeJA-responsiveness
Streb.11G019880.1	GARE-motif	TCTGTTG	part of a conserved DNA module involved in light responsiveness
Streb.11G019880.1	GARE-motif	ACGTG	gibberellin-responsive element
Streb.11G019880.1	ABRE	CACGTG	gibberellin-responsive element
Streb.11G019880.1	ABRE	ACGTG	cis-acting element involved in the abscisic acid responsiveness
Streb.11G019880.1	ABRE	CACGTG	cis-acting element involved in the abscisic acid responsiveness
Streb.11G019880.1	ABRE	ACGTG	cis-acting element involved in the abscisic acid responsiveness
Streb.11G019880.1	ABRE	ACGTG	cis-acting element involved in the abscisic acid responsiveness
Streb.11G019880.1	ABRE	AAACCA	cis-acting element involved in the abscisic acid responsiveness
Streb.11G019880.1	ARE	AAACCA	cis-acting element involved in the abscisic acid responsiveness
Streb.11G019880.1	ARE	GCCACT	cis-acting regulatory element essential for the anaerobic induction
Streb.11G019880.1	CAT-box	CCCCCG	cis-acting regulatory element essential for the anaerobic induction
Streb.11G019880.1	GC-motif	GGTTAA	cis-acting regulatory element related to meristem expression
Streb.11G019880.1	GT1-motif	GGTTAA	enhancer-like element involved in anoxic specific inducibility
Streb.11G019880.1	GT1-motif	TGACG	light responsive element
Streb.11G019880.1	TGACG-motif	GATGATGTGG	light responsive element
Streb.11G019880.1	O2-site	ATTCTCTAAC	cis-acting regulatory element involved in the MeJA-responsiveness
Streb.11G019880.1	TC-rich repeats	CCGAAA	cis-acting regulatory element involved in zein metabolism regulation
Streb.11G019880.1	LTR	motif_sequence	cis-acting element involved in defense and stress responsiveness
Streb.11G019880.1	TCT-motif	TGAGTCA	cis-acting element involved in low-temperature responsiveness
Streb.11G019880.1	GCN4_motif	GGTTAA	part of a light responsive element
Streb.11G020140.1	GT1-motif	GGTTAAT	cis-regulatory element involved in endosperm expression
Streb.11G020140.1	GT1-motif	GGTTAAT	light responsive element
Streb.11G020140.1	GT1-motif	GGTTAA	light responsive element
Streb.11G020140.1	GT1-motif	GTGTGTGAA	light responsive element
Streb.11G020140.1	GT1-motif	TGACG	light responsive element
Streb.11G020140.1	TGACG-motif	TGACG	light responsive element
Streb.11G020140.1	TGACG-motif	TGACG	cis-acting regulatory element involved in the MeJA-responsiveness
Streb.11G020140.1	TGACG-motif	TGACG	cis-acting regulatory element involved in the MeJA-responsiveness
Streb.11G020140.1	TGACG-motif	CAAAT	cis-acting regulatory element involved in the MeJA-responsiveness
Streb.11G020140.1	CAAT-box	TATA	cis-acting regulatory element involved in the MeJA-responsiveness
Streb.11G020140.1	ATCT-motif	AACCTAA	part of a light responsive element
Streb.11G020140.1	MRE	CCATCTTTTT	part of a conserved DNA module involved in light responsiveness
Streb.11G020140.1	TCA-element	CGTCA	MYB binding site involved in light responsiveness
Streb.11G020140.1	CGTCA-motif	CGTCA	cis-acting element involved in salicylic acid responsiveness
Streb.11G020140.1	CGTCA-motif	CGTCA	cis-acting regulatory element involved in the MeJA-responsiveness
Streb.11G020140.1	CGTCA-motif	CGTCA	cis-acting regulatory element involved in the MeJA-responsiveness
Streb.11G020140.1	CGTCA-motif	TTCGACCATCTT	cis-acting regulatory element involved in the MeJA-responsiveness
Streb.11G020140.1	SARE	CCGAAA	cis-acting regulatory element involved in the MeJA-responsiveness
Streb.11G020140.1	LTR	ATTAAT	cis-acting element involved in salicylic acid responsiveness
Streb.11G020140.1	Box 4	ATTAAT	cis-acting element involved in low-temperature responsiveness
Streb.11G020140.1	Box 4	ATTAAT	part of a conserved DNA module involved in light responsiveness
Streb.11G020140.1	Box 4	GGATTTTACAGT	part of a conserved DNA module involved in light responsiveness
Streb.1G002080.1	Sp1	AGAAACTT	part of a conserved DNA module involved in light responsiveness
Streb.1G002080.1	AE-box	CGTCA	light responsive element
Streb.1G002080.1	CGTCA-motif	CGTCA	part of a module for light response
Streb.1G002080.1	CGTCA-motif	AAACCA	cis-acting regulatory element involved in the MeJA-responsiveness
Streb.1G002080.1	ARE	ACGTG	cis-acting regulatory element involved in the MeJA-responsiveness
Streb.1G002080.1	ABRE	AAGGATAAGG	cis-acting regulatory element essential for the anaerobic induction
Streb.1G002080.1	GATA-motif	AACCTAA	cis-acting element involved in the abscisic acid responsiveness
Streb.1G002080.1	MRE	CCTTTTG	part of a light responsive element
Streb.1G002080.1	P-box	CCTTTTG	MYB binding site involved in light responsiveness
Streb.1G002080.1	P-box	CCAAT	gibberellin-responsive element
Streb.1G002080.1	CAAT-box	TATACA	gibberellin-responsive element
Streb.1G002080.1	TC-rich repeats	CAACTG	cis-acting regulatory element involved in light responsiveness
Streb.1G002080.1	MBS	CACGAC	cis-acting element involved in defense and stress responsiveness
Streb.1G002080.1	G-box	CACGAC	MYB binding site involved in drought-inducibility
Streb.1G002080.1	G-box	CAACGG	cis-acting regulatory element involved in light responsiveness
Streb.1G002080.1	CCAAT-box	TGACG	cis-acting regulatory element involved in light responsiveness
Streb.1G002080.1	TGACG-motif	TGACG	MYBHv1 binding site
Streb.1G002080.1	TGACG-motif	CAACTG	cis-acting regulatory element involved in the MeJA-responsiveness
Streb.1G005290.1	MBS	TACGTG	cis-acting regulatory element involved in the MeJA-responsiveness
Streb.1G005290.1	G-box	TACGTG	MYB binding site involved in drought-inducibility
Streb.1G005290.1	G-box	CACGAC	cis-acting regulatory element involved in light responsiveness
Streb.1G005290.1	G-box	TAAACGTG	cis-acting regulatory element involved in light responsiveness
Streb.1G005290.1	G-box	GATGATGTGG	cis-acting regulatory element involved in light responsiveness
Streb.1G005290.1	O2-site	GGTTAA	cis-acting regulatory element involved in light responsiveness
Streb.1G005290.1	GT1-motif	GGTTAA	cis-acting regulatory element involved in zein metabolism regulation
Streb.1G005290.1	GT1-motif	GGTTAA	light responsive element
Streb.1G005290.1	GT1-motif	TGACG	light responsive element
Streb.1G005290.1	TGACG-motif	CAACGG	light responsive element
Streb.1G005290.1	CCAAT-box	TGGTAATAA	cis-acting regulatory element involved in the MeJA-responsiveness
Streb.1G005290.1	Box II	ATTATA	MYBHv1 binding site
Streb.1G005290.1	CAAT-box	TAGATAACC	part of a light responsive element
Streb.1G005290.1	I-box	CAAATGAA(A/G)A	cis-acting regulatory element involved in light responsiveness
Streb.1G005290.1	Gap-box	TGAGTCA	part of a light responsive element
Streb.1G005290.1	GCN4_motif	TGAGTCA	part of a light responsive element
Streb.1G005290.1	GCN4_motif	AAACCA	cis-regulatory element involved in endosperm expression
Streb.1G005290.1	ARE	ACGTG	cis-regulatory element involved in endosperm expression
Streb.1G005290.1	ABRE	ACGTG	cis-acting regulatory element essential for the anaerobic induction
Streb.1G005290.1	ABRE	ACGTG	cis-acting element involved in the abscisic acid responsiveness
Streb.1G005290.1	ABRE	TCTTAC	cis-acting element involved in the abscisic acid responsiveness
Streb.1G005290.1	TCT-motif	motif_sequence	cis-acting element involved in the abscisic acid responsiveness
Streb.1G005290.1	CGTCA-motif	CAAAGATATC	part of a light responsive element
Streb.1G005290.1	circadian	CAAAGATATC	cis-acting regulatory element involved in the MeJA-responsiveness
Streb.1G005290.1	circadian	GTAAT(G/C)ATTAC	cis-acting regulatory element involved in circadian control
Streb.1G005290.1	HD-Zip 3	CGTCA	cis-acting regulatory element involved in circadian control
Streb.1G015330.1	CGTCA-motif	ATTAAT	protein binding site
Streb.1G015330.1	Box 4	ATTAAT	cis-acting regulatory element involved in the MeJA-responsiveness
Streb.1G015330.1	Box 4	TATCCCA	part of a conserved DNA module involved in light responsiveness
Streb.1G015330.1	TATC-box	ACGTG	part of a conserved DNA module involved in light responsiveness
Streb.1G015330.1	ABRE	ACGTG	cis-acting element involved in gibberellin-responsiveness
Streb.1G015330.1	ABRE	ACGTG	cis-acting element involved in the abscisic acid responsiveness
Streb.1G015330.1	ABRE	GACACGTGGC	cis-acting element involved in the abscisic acid responsiveness
Streb.1G015330.1	ABRE	CACGTG	cis-acting element involved in the abscisic acid responsiveness
Streb.1G015330.1	ABRE	ACGTG	cis-acting element involved in the abscisic acid responsiveness
Streb.1G015330.1	ABRE	AAGATAAGATT	cis-acting element involved in the abscisic acid responsiveness
Streb.1G015330.1	GATA-motif	AAGATAAGATT	cis-acting element involved in the abscisic acid responsiveness
Streb.1G015330.1	GATA-motif	AAACCA	part of a light responsive element
Streb.1G015330.1	ARE	AAACCA	part of a light responsive element
Streb.1G015330.1	ARE	AAACCA	cis-acting regulatory element essential for the anaerobic induction
Streb.1G015330.1	ARE	AAACCA	cis-acting regulatory element essential for the anaerobic induction
Streb.1G015330.1	ARE	CACGTT	cis-acting regulatory element essential for the anaerobic induction
Streb.1G015330.1	G-Box	CACGTG	cis-acting regulatory element essential for the anaerobic induction
Streb.1G015330.1	G-Box	CAAAT	cis-acting regulatory element involved in light responsiveness
Streb.1G015330.1	CAAT-box	TAACACGTAG	cis-acting regulatory element involved in light responsiveness
Streb.1G015330.1	G-box	TACGTG	cis-acting regulatory element involved in light responsiveness
Streb.1G015330.1	G-box	CCACGTAA	cis-acting regulatory element involved in light responsiveness
Streb.1G015330.1	G-box	TACGTG	cis-acting regulatory element involved in light responsiveness
Streb.1G015330.1	G-box	CACGTG	cis-acting regulatory element involved in light responsiveness
Streb.1G015330.1	G-box	CAACTG	cis-acting regulatory element involved in light responsiveness
Streb.1G015330.1	MBS	CAACTG	cis-acting regulatory element involved in light responsiveness
Streb.1G015330.1	MBS	CCGAAA	MYB binding site involved in drought-inducibility
Streb.1G015330.1	LTR	AACGAC	MYB binding site involved in drought-inducibility
Streb.1G015330.1	TGA-element	AACGAC	cis-acting element involved in low-temperature responsiveness
Streb.1G015330.1	TGA-element	motif_sequence	auxin-responsive element
Streb.1G015330.1	ATC-motif	ACCTAACCCGC	auxin-responsive element
Streb.1G015330.1	chs-Unit 1 m1	CTAACGTATT	part of a conserved DNA module involved in light responsiveness
Streb.1G015330.1	ACE	ATAGAAATCAA	part of a light responsive element
Streb.1G015330.1	AT-rich element	CCATCTTTTT	cis-acting element involved in light responsiveness
Streb.1G015330.1	TCA-element	ACGAGCACCGCC	binding site of AT-rich DNA binding protein (ATBP-1)
Streb.1G015330.1	C-box	GCCACT	cis-acting element involved in salicylic acid responsiveness
Streb.1G015330.1	CAT-box	ACACGTAGA	cis-acting regulatory element involved in light responsiveness
Streb.1G015330.1	Box II	AATCTAATCC	cis-acting regulatory element related to meristem expression
Streb.1G015330.1	ATCT-motif	TTTTTACGGTTA	part of a light responsive element
Streb.1G015330.1	MBSI	CAACGG	part of a conserved DNA module involved in light responsiveness
Streb.1G015330.1	CCAAT-box	TGACG	MYB binding site involved in flavonoid biosynthetic genes regulation
Streb.1G015330.1	TGACG-motif	GGTTAAT	MYBHv1 binding site
Streb.1G015330.1	GT1-motif	GGTTAA	cis-acting regulatory element involved in the MeJA-responsiveness
Streb.1G015330.1	GT1-motif	GTTTTCTTAC	light responsive element
Streb.1G015330.1	TC-rich repeats	ATTCTCTAAC	light responsive element
Streb.1G023230.1	TC-rich repeats	ATTCTCTAAC	cis-acting element involved in defense and stress responsiveness
Streb.1G023230.1	TC-rich repeats	ATTCTCTAAC	cis-acting element involved in defense and stress responsiveness
Streb.1G023230.1	TC-rich repeats	GTTTTCTTAC	cis-acting element involved in defense and stress responsiveness
Streb.1G023230.1	TC-rich repeats	ATAGATAA	cis-acting element involved in defense and stress responsiveness
Streb.1G023230.1	GA-motif	CAACGG	cis-acting element involved in defense and stress responsiveness
Streb.1G023230.1	CCAAT-box	GGTTAA	part of a light responsive element
Streb.1G023230.1	GT1-motif	GGTTAA	MYBHv1 binding site
Streb.1G023230.1	GT1-motif	AACCTAA	light responsive element
Streb.1G023230.1	MRE	AACCTAA	light responsive element
Streb.1G023230.1	MRE	AACCTAA	MYB binding site involved in light responsiveness
Streb.1G023230.1	MRE	AACCTAA	MYB binding site involved in light responsiveness
Streb.1G023230.1	MRE	AACCTAA	MYB binding site involved in light responsiveness
Streb.1G023230.1	MRE	AACCTAA	MYB binding site involved in light responsiveness
Streb.1G023230.1	MRE	AACCTAA	MYB binding site involved in light responsiveness
Streb.1G023230.1	MRE	CAAAT	MYB binding site involved in light responsiveness
Streb.1G023230.1	CAAT-box	GCCACT	MYB binding site involved in light responsiveness
Streb.1G023230.1	CAT-box	TATAAA	part of a light responsive element
Streb.1G023230.1	TCT-motif	ACCTAACCCGC	cis-acting regulatory element related to meristem expression
Streb.1G023230.1	chs-Unit 1 m1	ATTAAT	part of a light responsive element
Streb.1G023230.1	Box 4	ATTAAT	part of a light responsive element
Streb.1G023230.1	Box 4	ATTAAT	part of a conserved DNA module involved in light responsiveness
Streb.1G023230.1	Box 4	ATTAAT	part of a conserved DNA module involved in light responsiveness
Streb.1G023230.1	Box 4	motif_sequence	part of a conserved DNA module involved in light responsiveness
Streb.1G023230.1	Sp1	AACGAC	part of a conserved DNA module involved in light responsiveness
Streb.1G023230.1	TGA-element	AACGAC	light responsive element
Streb.1G023230.1	TGA-element	CCAAT	auxin-responsive element
Streb.1G023880.1	CAAT-box	TATA	auxin-responsive element
Streb.1G023880.1	LAMP-element	CGTCA	part of a light responsive element
Streb.1G023880.1	CGTCA-motif	ATTAAT	part of a light responsive element
Streb.1G023880.1	Box 4	ATTAAT	cis-acting regulatory element involved in the MeJA-responsiveness
Streb.1G023880.1	Box 4	AGAAACAA	part of a conserved DNA module involved in light responsiveness
Streb.1G023880.1	AE-box	AAACCA	part of a conserved DNA module involved in light responsiveness
Streb.1G023880.1	ARE	AAACCA	part of a module for light response
Streb.1G023880.1	ARE	AAACCA	cis-acting regulatory element essential for the anaerobic induction
Streb.1G023880.1	ARE	AAACCA	cis-acting regulatory element essential for the anaerobic induction
Streb.1G023880.1	ARE	AAACCA	cis-acting regulatory element essential for the anaerobic induction
Streb.1G023880.1	ARE	AAACCA	cis-acting regulatory element essential for the anaerobic induction
Streb.1G023880.1	ARE	AAACCA	cis-acting regulatory element essential for the anaerobic induction
Streb.1G023880.1	ARE	AACCTAA	cis-acting regulatory element essential for the anaerobic induction
Streb.1G023880.1	MRE	AATCTAATCC	cis-acting regulatory element essential for the anaerobic induction
Streb.1G023880.1	ATCT-motif	AATCTAATCC	MYB binding site involved in light responsiveness
Streb.1G023880.1	ATCT-motif	TGACG	part of a conserved DNA module involved in light responsiveness
Streb.1G023880.1	TGACG-motif	GGTTAA	part of a conserved DNA module involved in light responsiveness
Streb.1G023880.1	GT1-motif	GGTTAA	cis-acting regulatory element involved in the MeJA-responsiveness
Streb.1G023880.1	GT1-motif	ATTCTCTAAC	light responsive element
Streb.1G023880.1	TC-rich repeats	CCGAAA	light responsive element
Streb.1G023880.1	LTR	CCGAAA	cis-acting element involved in defense and stress responsiveness
Streb.1G023880.1	LTR	CCGAAA	cis-acting element involved in low-temperature responsiveness
Streb.1G023880.1	LTR	motif_sequence	cis-acting element involved in low-temperature responsiveness
Streb.1G023880.1	TCT-motif	TCTTAC	cis-acting element involved in low-temperature responsiveness
Streb.1G023880.1	TCT-motif	TCTTAC	part of a light responsive element
Streb.1G023880.1	TCT-motif	TCTTAC	part of a light responsive element
Streb.1G023880.1	TCT-motif	TCTTAC	part of a light responsive element
Streb.1G023880.1	TCT-motif	CTAACGTATT	part of a light responsive element
Streb.1G023880.1	ACE	CCATCTTTTT	part of a light responsive element
Streb.1G023880.1	TCA-element	CAATCAAAACCT	cis-acting element involved in light responsiveness
Streb.1G023880.1	AAAC-motif	CCTTTTG	cis-acting element involved in salicylic acid responsiveness
Streb.1G027430.1	P-box	CCCCCG	light responsive element
Streb.1G027430.1	GC-motif	CCGTCC	gibberellin-responsive element
Streb.1G027430.1	A-box	TATAAAA	enhancer-like element involved in anoxic specific inducibility
Streb.1G027430.1	CAAT-box	gGATAAGGTG	cis-acting regulatory element
Streb.1G027430.1	I-box	CACGTT	part of a light responsive element
Streb.1G027430.1	G-Box	GGTCCAT	part of a light responsive element
Streb.1G027430.1	AuxRR-core	GATGACATGG	cis-acting regulatory element involved in light responsiveness
Streb.1G027430.1	O2-site	GATGATGTGG	cis-acting regulatory element involved in auxin responsiveness
Streb.1G027430.1	O2-site	CACGTC	cis-acting regulatory element involved in zein metabolism regulation
Streb.1G027430.1	G-box	CACGTC	cis-acting regulatory element involved in zein metabolism regulation
Streb.1G027430.1	G-box	CACGTC	cis-acting regulatory element involved in light responsiveness
Streb.1G027430.1	G-box	TAAACGTG	cis-acting regulatory element involved in light responsiveness
Streb.1G027430.1	G-box	GTTTTCTTAC	cis-acting regulatory element involved in light responsiveness
Streb.1G027430.1	TC-rich repeats	GGTTAA	cis-acting regulatory element involved in light responsiveness
Streb.1G027430.1	GT1-motif	GGTTAA	cis-acting element involved in defense and stress responsiveness
Streb.1G027430.1	GT1-motif	GGTTAA	light responsive element
Streb.1G027430.1	GT1-motif	TCTCCCT	light responsive element
Streb.1G027430.1	TCCC-motif	CAACGG	light responsive element
Streb.1G027430.1	CCAAT-box	motif_sequence	part of a light responsive element
Streb.1G027430.1	Box 4	AACGAC	MYBHv1 binding site
Streb.1G027430.1	TGA-element	CCGAAA	part of a conserved DNA module involved in light responsiveness
Streb.1G027430.1	LTR	CCGAAA	auxin-responsive element
Streb.1G027430.1	LTR	CCATCTTTTT	cis-acting element involved in low-temperature responsiveness
Streb.1G027430.1	TCA-element	TGAGTCA	cis-acting element involved in low-temperature responsiveness
Streb.1G027430.1	GCN4_motif	AAGGATAAGG	cis-acting element involved in salicylic acid responsiveness
Streb.1G027430.1	GATA-motif	TCTTAC	cis-regulatory element involved in endosperm expression
Streb.1G027430.1	TCT-motif	TCTTAC	part of a light responsive element
Streb.1G027430.1	TCT-motif	ACGTG	part of a light responsive element
Streb.1G027430.1	ABRE	ACGTG	part of a light responsive element
Streb.1G027430.1	ABRE	ACGTG	cis-acting element involved in the abscisic acid responsiveness
Streb.1G027430.1	ABRE	ACGTG	cis-acting element involved in the abscisic acid responsiveness
Streb.1G027430.1	ABRE	ATTAAT	cis-acting element involved in the abscisic acid responsiveness
Streb.1G029990.1	Box 4	CAAAGATATC	cis-acting element involved in the abscisic acid responsiveness
Streb.1G029990.1	circadian	CGTCA	part of a conserved DNA module involved in light responsiveness
Streb.1G029990.1	CGTCA-motif	CGTCA	cis-acting regulatory element involved in circadian control
Streb.1G029990.1	CGTCA-motif	AAACCA	cis-acting regulatory element involved in the MeJA-responsiveness
Streb.1G029990.1	ARE	AAACCA	cis-acting regulatory element involved in the MeJA-responsiveness
Streb.1G029990.1	ARE	AAACCA	cis-acting regulatory element essential for the anaerobic induction
Streb.1G029990.1	ARE	AAACCA	cis-acting regulatory element essential for the anaerobic induction
Streb.1G029990.1	ARE	GATAGGG	cis-acting regulatory element essential for the anaerobic induction
Streb.1G029990.1	GATA-motif	AAGATAAGATT	cis-acting regulatory element essential for the anaerobic induction
Streb.1G029990.1	GATA-motif	GATAGGG	part of a light responsive element
Streb.1G029990.1	GATA-motif	TACGGTC	part of a light responsive element
Streb.1G029990.1	ABRE	GACACGTGGC	part of a light responsive element
Streb.1G029990.1	ABRE	CACGTG	cis-acting element involved in the abscisic acid responsiveness
Streb.1G029990.1	ABRE	ACGTG	cis-acting element involved in the abscisic acid responsiveness
Streb.1G029990.1	ABRE	ACGTG	cis-acting element involved in the abscisic acid responsiveness
Streb.1G029990.1	ABRE	ACGTG	cis-acting element involved in the abscisic acid responsiveness
Streb.1G029990.1	ABRE	CACGTG	cis-acting element involved in the abscisic acid responsiveness
Streb.1G029990.1	ABRE	ACGTG	cis-acting element involved in the abscisic acid responsiveness
Streb.1G029990.1	ABRE	TACGGTC	cis-acting element involved in the abscisic acid responsiveness
Streb.1G029990.1	ABRE	CATGCATG	cis-acting element involved in the abscisic acid responsiveness
Streb.1G029990.1	RY-element	TATA	cis-acting element involved in the abscisic acid responsiveness
Streb.1G029990.1	CAAT-box	CACGTG	cis-acting regulatory element involved in seed-specific regulation
Streb.1G029990.1	G-Box	GCCACGTGGA	cis-acting regulatory element involved in light responsiveness
Streb.1G029990.1	G-box	CACGTG	cis-acting regulatory element involved in light responsiveness
Streb.1G029990.1	G-box	CACGTC	cis-acting regulatory element involved in light responsiveness
Streb.1G029990.1	G-box	TACGTG	cis-acting regulatory element involved in light responsiveness
Streb.1G029990.1	G-box	ACACGTGT	cis-acting regulatory element involved in light responsiveness
Streb.1G029990.1	G-box	CACGTG	cis-acting regulatory element involved in light responsiveness
Streb.1G029990.1	G-box	motif_sequence	cis-acting regulatory element involved in light responsiveness
Streb.1G029990.1	TCT-motif	AACCTAA	cis-acting regulatory element involved in light responsiveness
Streb.1G029990.1	MRE	AACCTAA	part of a light responsive element
Streb.1G029990.1	MRE	AATCTAATCC	MYB binding site involved in light responsiveness
Streb.1G029990.1	ATCT-motif	GATGATGTGG	MYB binding site involved in light responsiveness
Streb.1G029990.1	O2-site	GTTTTCTTAC	part of a conserved DNA module involved in light responsiveness
Streb.1G029990.1	TC-rich repeats	TGACG	cis-acting regulatory element involved in zein metabolism regulation
Streb.1G029990.1	TGACG-motif	TGACG	cis-acting element involved in defense and stress responsiveness
Streb.1G029990.1	TGACG-motif	GGTTAA	cis-acting regulatory element involved in the MeJA-responsiveness
Streb.1G029990.1	GT1-motif	GGTTAA	cis-acting regulatory element involved in the MeJA-responsiveness
Streb.1G029990.1	GT1-motif	CCTTTTG	light responsive element
Streb.1G035990.1	P-box	CCAAT	light responsive element
Streb.1G035990.1	CAAT-box	CACGAC	gibberellin-responsive element
Streb.1G035990.1	G-box	CTTTATCA	MYB binding site involved in drought-inducibility
Streb.1G035990.1	LAMP-element	ATTAAT	cis-acting regulatory element involved in light responsiveness
Streb.1G035990.1	Box 4	ATTAAT	part of a light responsive element
Streb.1G035990.1	Box 4	CGTCA	part of a conserved DNA module involved in light responsiveness
Streb.1G035990.1	CGTCA-motif	AAACCA	part of a conserved DNA module involved in light responsiveness
Streb.1G035990.1	ARE	AAACCA	cis-acting regulatory element involved in the MeJA-responsiveness
Streb.1G035990.1	ARE	AAACCA	cis-acting regulatory element essential for the anaerobic induction
Streb.1G035990.1	ARE	TCTGTTG	cis-acting regulatory element essential for the anaerobic induction
Streb.1G035990.1	GARE-motif	AAGATAAGATT	cis-acting regulatory element essential for the anaerobic induction
Streb.1G035990.1	GATA-motif	AAGATAAGATT	gibberellin-responsive element
Streb.1G035990.1	GATA-motif	TGGTAATAA	part of a light responsive element
Streb.1G035990.1	Box II	AACCTAA	part of a light responsive element
Streb.1G035990.1	MRE	CCCCCG	part of a light responsive element
Streb.1G035990.1	GC-motif	GATGACATGG	MYB binding site involved in light responsiveness
Streb.1G035990.1	O2-site	CAACGG	enhancer-like element involved in anoxic specific inducibility
Streb.1G035990.1	CCAAT-box	TGACG	cis-acting regulatory element involved in zein metabolism regulation
Streb.1G035990.1	TGACG-motif	motif_sequence	MYBHv1 binding site
Streb.1G035990.1	ATC-motif	ATAGAAATCAA	cis-acting regulatory element involved in the MeJA-responsiveness
Streb.1G035990.1	AT-rich element	CAATCAAAACCT	part of a conserved DNA module involved in light responsiveness
Streb.1G035990.1	AAAC-motif	CAAAGATATC	binding site of AT-rich DNA binding protein (ATBP-1)
Streb.1G036060.1	circadian	ACGTG	light responsive element
Streb.1G036060.1	ABRE	AAACCA	cis-acting regulatory element involved in circadian control
Streb.1G036060.1	ARE	CAAAT	cis-acting element involved in the abscisic acid responsiveness
Streb.1G036060.1	CAAT-box	CCTTTTG	cis-acting regulatory element essential for the anaerobic induction
Streb.1G036060.1	P-box	CAACTG	gibberellin-responsive element
Streb.1G036060.1	MBS	TACGTG	gibberellin-responsive element
Streb.1G036060.1	G-box	CCGAAA	MYB binding site involved in drought-inducibility
Streb.1G036060.1	LTR	motif_sequence	cis-acting regulatory element involved in light responsiveness
Streb.1G036060.1	TCT-motif	CCATCTTTTT	cis-acting element involved in low-temperature responsiveness
Streb.1G036060.1	TCA-element	CCATCTTTTT	part of a light responsive element
Streb.1G036060.1	TCA-element	AACCTAA	cis-acting element involved in salicylic acid responsiveness
Streb.1G036060.1	MRE	GGTTAA	cis-acting element involved in salicylic acid responsiveness
Streb.1G036060.1	GT1-motif	GATGA(C/T)(A/G)TG(A/G)	MYB binding site involved in light responsiveness
Streb.1G036060.1	O2-site	AAACCA	light responsive element
Streb.1G050640.1	ARE	AAACCA	cis-acting regulatory element involved in zein metabolism regulation
Streb.1G050640.1	ARE	AAACCA	cis-acting regulatory element essential for the anaerobic induction
Streb.1G050640.1	ARE	TCTGTTG	cis-acting regulatory element essential for the anaerobic induction
Streb.1G050640.1	GARE-motif	ATTAAT	cis-acting regulatory element essential for the anaerobic induction
Streb.1G050640.1	Box 4	ATTAAT	gibberellin-responsive element
Streb.1G050640.1	Box 4	ATTAAT	part of a conserved DNA module involved in light responsiveness
Streb.1G050640.1	Box 4	ATTAAT	part of a conserved DNA module involved in light responsiveness
Streb.1G050640.1	Box 4	CGTCA	part of a conserved DNA module involved in light responsiveness
Streb.1G050640.1	CGTCA-motif	CGTCA	part of a conserved DNA module involved in light responsiveness
Streb.1G050640.1	CGTCA-motif	CGTCA	cis-acting regulatory element involved in the MeJA-responsiveness
Streb.1G050640.1	CGTCA-motif	CCTTTTG	cis-acting regulatory element involved in the MeJA-responsiveness
Streb.1G050640.1	P-box	CCTTTTG	cis-acting regulatory element involved in the MeJA-responsiveness
Streb.1G050640.1	P-box	CAAAT	gibberellin-responsive element
Streb.1G050640.1	CAAT-box	TCACTTGA	gibberellin-responsive element
Streb.1G050640.1	chs-CMA2a	TACAAAA	cis-acting regulatory element involved in light responsiveness
Streb.1G050640.1	GCN4_motif	TCTTAC	part of a light responsive element
Streb.1G050640.1	TCT-motif	GAATTTAATTAA	cis-regulatory element involved in endosperm expression
Streb.1G050640.1	LTR	TTTTTACGGTTA	part of a light responsive element
Streb.1G050640.1	MBSI	TGACG	cis-acting element involved in low-temperature responsiveness
Streb.1G050640.1	TGACG-motif	TGACG	MYB binding site involved in flavonoid biosynthetic genes regulation
Streb.1G050640.1	TGACG-motif	TGACG	cis-acting regulatory element involved in the MeJA-responsiveness
Streb.1G050640.1	TGACG-motif	GGTTAA	cis-acting regulatory element involved in the MeJA-responsiveness
Streb.1G050640.1	GT1-motif	GGTTAAT	cis-acting regulatory element involved in the MeJA-responsiveness
Streb.1G050640.1	GT1-motif	motif_sequence	light responsive element
Streb.1G050880.1	LTR	TGAGTCA	light responsive element
Streb.1G050880.1	GCN4_motif	TCTTAC	cis-acting element involved in low-temperature responsiveness
Streb.1G050880.1	TCT-motif	TTACTTAA	cis-regulatory element involved in endosperm expression
Streb.1G050880.1	chs-CMA1a	TTACTTAA	part of a light responsive element
Streb.1G050880.1	chs-CMA1a	AACCTAA	part of a light responsive element
Streb.1G050880.1	MRE	ATTCTCTAAC	part of a light responsive element
Streb.1G050880.1	TC-rich repeats	ATAGATAA	MYB binding site involved in light responsiveness
Streb.1G050880.1	GA-motif	TTTTTACGGTTA	cis-acting element involved in defense and stress responsiveness
Streb.1G050880.1	MBSI	TGACG	part of a light responsive element
Streb.1G050880.1	TGACG-motif	TGACG	MYB binding site involved in flavonoid biosynthetic genes regulation
Streb.1G050880.1	TGACG-motif	GGTTAA	cis-acting regulatory element involved in the MeJA-responsiveness
Streb.1G050880.1	GT1-motif	ATTAAT	cis-acting regulatory element involved in the MeJA-responsiveness
Streb.1G050880.1	Box 4	ATTAAT	light responsive element
Streb.1G050880.1	Box 4	ATTAAT	part of a conserved DNA module involved in light responsiveness
Streb.1G050880.1	Box 4	ATTAAT	part of a conserved DNA module involved in light responsiveness
Streb.1G050880.1	Box 4	CAAAGATATC	part of a conserved DNA module involved in light responsiveness
Streb.1G050880.1	circadian	CAAAGATATC	part of a conserved DNA module involved in light responsiveness
Streb.1G050880.1	circadian	CGTCA	cis-acting regulatory element involved in circadian control
Streb.1G050880.1	CGTCA-motif	CGTCA	cis-acting regulatory element involved in circadian control
Streb.1G050880.1	CGTCA-motif	AAACCA	cis-acting regulatory element involved in the MeJA-responsiveness
Streb.1G050880.1	ARE	AAACCA	cis-acting regulatory element involved in the MeJA-responsiveness
Streb.1G050880.1	ARE	AAACCA	cis-acting regulatory element essential for the anaerobic induction
Streb.1G050880.1	ARE	AAACCA	cis-acting regulatory element essential for the anaerobic induction
Streb.1G050880.1	ARE	ACGTG	cis-acting regulatory element essential for the anaerobic induction
Streb.1G050880.1	ABRE	ACGTG	cis-acting regulatory element essential for the anaerobic induction
Streb.1G050880.1	ABRE	AAGATAAGATT	cis-acting element involved in the abscisic acid responsiveness
Streb.1G050880.1	GATA-motif	AAGATAAGGCT	cis-acting element involved in the abscisic acid responsiveness
Streb.1G050880.1	I-box	CAAAT	part of a light responsive element
Streb.1G050880.1	CAAT-box	TACGTG	part of a light responsive element
Streb.1G050880.1	G-box	CACGTC	part of a light responsive module
Streb.1G050880.1	G-box	CAACTG	cis-acting regulatory element involved in light responsiveness
Streb.1G050880.1	MBS	GGTCCAT	cis-acting regulatory element involved in light responsiveness
Streb.1G050880.1	AuxRR-core	taTATAAAtc	MYB binding site involved in drought-inducibility
Streb.2G000300.1	CAAT-box	CAACTG	cis-acting regulatory element involved in auxin responsiveness
Streb.2G000300.1	MBS	CCGAAA	cis-acting regulatory element involved in light responsiveness
Streb.2G000300.1	LTR	CAAAGATATC	MYB binding site involved in drought-inducibility
Streb.2G000300.1	circadian	motif_sequence	cis-acting element involved in low-temperature responsiveness
Streb.2G000300.1	Box 4	AAGATAAGATT	cis-acting regulatory element involved in circadian control
Streb.2G000300.1	GATA-motif	TTACTTAA	part of a conserved DNA module involved in light responsiveness
Streb.2G000300.1	chs-CMA1a	GACACGTACGT	part of a light responsive element
Streb.2G000300.1	ABRE	CAATCAAAACCT	part of a light responsive element
Streb.2G000300.1	AAAC-motif	AAACCA	cis-acting element involved in the abscisic acid responsiveness
Streb.2G000300.1	ARE	AAACCA	light responsive element
Streb.2G000300.1	ARE	AAACCA	cis-acting regulatory element essential for the anaerobic induction
Streb.2G000300.1	ARE	AAACCA	cis-acting regulatory element essential for the anaerobic induction
Streb.2G000300.1	ARE	AAACCA	cis-acting regulatory element essential for the anaerobic induction
Streb.2G000300.1	ARE	AAACCA	cis-acting regulatory element essential for the anaerobic induction
Streb.2G000300.1	ARE	CGTCA	cis-acting regulatory element essential for the anaerobic induction
Streb.2G001010.1	CGTCA-motif	CGTCA	cis-acting regulatory element essential for the anaerobic induction
Streb.2G001010.1	CGTCA-motif	CGTCA	cis-acting regulatory element involved in the MeJA-responsiveness
Streb.2G001010.1	CGTCA-motif	CGTCA	cis-acting regulatory element involved in the MeJA-responsiveness
Streb.2G001010.1	CGTCA-motif	(T/C)C(T/C)AACGG(T/C)(T/C)A	cis-acting regulatory element involved in the MeJA-responsiveness
Streb.2G001010.1	MSA-like	motif_sequence	cis-acting regulatory element involved in the MeJA-responsiveness
Streb.2G001010.1	TATC-box	TCTTAC	cis-acting element involved in cell cycle regulation
Streb.2G001010.1	TCT-motif	AAGGATAAGG	cis-acting element involved in gibberellin-responsiveness
Streb.2G001010.1	GATA-motif	GATAGGG	part of a light responsive element
Streb.2G001010.1	GATA-motif	TTACTTAA	part of a light responsive element
Streb.2G001010.1	chs-CMA1a	ATAGAAATCAA	part of a light responsive element
Streb.2G001010.1	AT-rich element	AAACCA	part of a light responsive element
Streb.2G001010.1	ARE	AAACCA	binding site of AT-rich DNA binding protein (ATBP-1)
Streb.2G001010.1	ARE	AAACCA	cis-acting regulatory element essential for the anaerobic induction
Streb.2G001010.1	ARE	AAACCA	cis-acting regulatory element essential for the anaerobic induction
Streb.2G001010.1	ARE	AAACCA	cis-acting regulatory element essential for the anaerobic induction
Streb.2G001010.1	ARE	AAACCA	cis-acting regulatory element essential for the anaerobic induction
Streb.2G001010.1	ARE	AAACCA	cis-acting regulatory element essential for the anaerobic induction
Streb.2G001010.1	ARE	AAACCA	cis-acting regulatory element essential for the anaerobic induction
Streb.2G001010.1	ARE	CCATCTTTTT	cis-acting regulatory element essential for the anaerobic induction
Streb.2G001010.1	TCA-element	CAAAT	cis-acting regulatory element essential for the anaerobic induction
Streb.2G001010.1	CAAT-box	CAACGG	cis-acting element involved in salicylic acid responsiveness
Streb.2G001010.1	CCAAT-box	TAAAATACT	MYBHv1 binding site
Streb.2G001010.1	AT-rich sequence	GGTTAA	MYBHv1 binding site
Streb.2G001010.1	GT1-motif	GGTTAA	element for maximal elicitor-mediated activation (2copies)
Streb.2G001010.1	GT1-motif	GGTTAA	light responsive element
Streb.2G001010.1	GT1-motif	GGTTAA	light responsive element
Streb.2G001010.1	GT1-motif	GGTTAA	light responsive element
Streb.2G001010.1	GT1-motif	atCATTTTCACt	light responsive element
Streb.2G001010.1	Box III	TGACG	light responsive element
Streb.2G001010.1	TGACG-motif	TGACG	protein binding site
Streb.2G001010.1	TGACG-motif	TGACG	cis-acting regulatory element involved in the MeJA-responsiveness
Streb.2G001010.1	TGACG-motif	TGACG	cis-acting regulatory element involved in the MeJA-responsiveness
Streb.2G001010.1	TGACG-motif	CTTTATCA	cis-acting regulatory element involved in the MeJA-responsiveness
Streb.2G001010.1	LAMP-element	GATGATGTGG	cis-acting regulatory element involved in the MeJA-responsiveness
Streb.2G001010.1	O2-site	TCTTAC	part of a light responsive element
Streb.2G002460.1	TCT-motif	GAATTTAATTAA	cis-acting regulatory element involved in zein metabolism regulation
Streb.2G002460.1	GARE-motif	AAACCA	part of a light responsive element
Streb.2G002460.1	ARE	AAACCA	gibberellin-responsive element
Streb.2G002460.1	ARE	CCGAAA	cis-acting regulatory element essential for the anaerobic induction
Streb.2G002460.1	LTR	CCGAAA	cis-acting regulatory element essential for the anaerobic induction
Streb.2G002460.1	LTR	CGTCA	cis-acting element involved in low-temperature responsiveness
Streb.2G002460.1	CGTCA-motif	CGTCA	cis-acting element involved in low-temperature responsiveness
Streb.2G002460.1	CGTCA-motif	AACGAC	cis-acting regulatory element involved in the MeJA-responsiveness
Streb.2G002460.1	TGA-element	AACGAC	cis-acting regulatory element involved in the MeJA-responsiveness
Streb.2G002460.1	TGA-element	ATTAAT	auxin-responsive element
Streb.2G002460.1	Box 4	ATTAAT	auxin-responsive element
Streb.2G002460.1	Box 4	ATTAAT	part of a conserved DNA module involved in light responsiveness
Streb.2G002460.1	Box 4	ATTAAT	part of a conserved DNA module involved in light responsiveness
Streb.2G002460.1	Box 4	motif_sequence	part of a conserved DNA module involved in light responsiveness
Streb.2G002460.1	ATC-motif	CAACGG	part of a conserved DNA module involved in light responsiveness
Streb.2G002460.1	CCAAT-box	TGACG	part of a conserved DNA module involved in light responsiveness
Streb.2G002460.1	TGACG-motif	TGACG	MYBHv1 binding site
Streb.2G002460.1	TGACG-motif	TCTCCCT	cis-acting regulatory element involved in the MeJA-responsiveness
Streb.2G002460.1	TCCC-motif	TCTCCCT	cis-acting regulatory element involved in the MeJA-responsiveness
Streb.2G002460.1	TCCC-motif	GGTTAA	part of a light responsive element
Streb.2G002460.1	GT1-motif	GGTTAAT	part of a light responsive element
Streb.2G002460.1	GT1-motif	GGTTAA	light responsive element
Streb.2G002460.1	GT1-motif	TAAAATACT	light responsive element
Streb.2G002460.1	AT-rich sequence	CAACTG	light responsive element
Streb.2G002460.1	MBS	ATAGATAA	element for maximal elicitor-mediated activation (2copies)
Streb.2G002460.1	GA-motif	GATGACATGG	MYB binding site involved in drought-inducibility
Streb.2G002460.1	O2-site	GTTGACGTGA	part of a light responsive element
Streb.2G002460.1	O2-site	GATGATGTGG	cis-acting regulatory element involved in zein metabolism regulation
Streb.2G002460.1	O2-site	GATGATGTGG	cis-acting regulatory element involved in zein metabolism regulation
Streb.2G002460.1	O2-site	GATGACATGG	cis-acting regulatory element involved in zein metabolism regulation
Streb.2G002460.1	O2-site	CACGAC	cis-acting regulatory element involved in zein metabolism regulation
Streb.2G002460.1	G-box	GGTCCAT	cis-acting regulatory element involved in zein metabolism regulation
Streb.2G002460.1	AuxRR-core	CCAAT	cis-acting regulatory element involved in light responsiveness
Streb.2G002460.1	CAAT-box	TATA	cis-acting regulatory element involved in auxin responsiveness
Streb.2G002460.1	ABRE	ACGTG	cis-acting regulatory element related to meristem expression
Streb.2G002660.1	ABRE	TCTTAC	cis-acting element involved in the abscisic acid responsiveness
Streb.2G002660.1	TCT-motif	TCTTAC	cis-acting element involved in the abscisic acid responsiveness
Streb.2G002660.1	TCT-motif	TCTGTTG	part of a light responsive element
Streb.2G002660.1	GARE-motif	CTAACGTATT	part of a light responsive element
Streb.2G002660.1	ACE	GAATTTAATTAA	gibberellin-responsive element
Streb.2G002660.1	ARE	AAACCA	cis-acting element involved in light responsiveness
Streb.2G002660.1	ARE	CCGAAA	cis-acting regulatory element essential for the anaerobic induction
Streb.2G002660.1	LTR	CCGAAA	cis-acting regulatory element essential for the anaerobic induction
Streb.2G002660.1	LTR	ATTAAT	cis-acting element involved in low-temperature responsiveness
Streb.2G002660.1	Box 4	GGATTTTACAGT	cis-acting element involved in low-temperature responsiveness
Streb.2G002660.1	AE-box	AGTAATCT	part of a conserved DNA module involved in light responsiveness
Streb.2G002660.1	ATC-motif	motif_sequence	part of a module for light response
Streb.2G002660.1	AT-rich sequence	GGTTAA	part of a conserved DNA module involved in light responsiveness
Streb.2G002660.1	GT1-motif	GGTTAA	element for maximal elicitor-mediated activation (2copies)
Streb.2G002660.1	GT1-motif	GGTTAAT	light responsive element
Streb.2G002660.1	GT1-motif	GGTTAA	light responsive element
Streb.2G002660.1	GT1-motif	GGTCCAT	light responsive element
Streb.2G002660.1	AuxRR-core	CACGTG	light responsive element
Streb.2G002660.1	G-box	ATAGATAA	cis-acting regulatory element involved in auxin responsiveness
Streb.2G002660.1	GA-motif	CAAAT	cis-acting regulatory element involved in light responsiveness
Streb.2G002660.1	CAAT-box	TCACTTGA	part of a light responsive element
Streb.2G002660.1	chs-CMA2a	AAATTTCCT	cis-acting regulatory element involved in light responsiveness
Streb.2G002660.1	WUN-motif	TATA	part of a light responsive element
Streb.2G002660.1	TC-rich repeats	GATGATGTGG	wound-responsive element
Streb.2G012600.1	O2-site	TACGTG	cis-acting element involved in defense and stress responsiveness
Streb.2G012600.1	G-box	TGACG	cis-acting regulatory element involved in zein metabolism regulation
Streb.2G012600.1	TGACG-motif	TGACG	cis-acting regulatory element involved in light responsiveness
Streb.2G012600.1	TGACG-motif	TCTCCCT	cis-acting regulatory element involved in the MeJA-responsiveness
Streb.2G012600.1	TCCC-motif	AATCTAATCC	cis-acting regulatory element involved in the MeJA-responsiveness
Streb.2G012600.1	ATCT-motif	AATCTAATCC	part of a light responsive element
Streb.2G012600.1	ATCT-motif	CCAAT	part of a conserved DNA module involved in light responsiveness
Streb.2G012600.1	CAAT-box	AAACCA	part of a conserved DNA module involved in light responsiveness
Streb.2G012600.1	ARE	AAACCA	cis-acting regulatory element related to meristem expression
Streb.2G012600.1	ARE	AAACCA	cis-acting regulatory element essential for the anaerobic induction
Streb.2G012600.1	ARE	CCATCTTTTT	cis-acting regulatory element essential for the anaerobic induction
Streb.2G012600.1	TCA-element	TCAGAAGAGG	cis-acting regulatory element essential for the anaerobic induction
Streb.2G012600.1	TCA-element	TATCCCA	cis-acting element involved in salicylic acid responsiveness
Streb.2G012600.1	TATC-box	ACGTG	cis-acting element involved in salicylic acid responsiveness
Streb.2G012600.1	ABRE	TCTTAC	cis-acting element involved in gibberellin-responsiveness
Streb.2G012600.1	TCT-motif	TCTTAC	cis-acting element involved in the abscisic acid responsiveness
Streb.2G012600.1	TCT-motif	AAGATAAGATT	part of a light responsive element
Streb.2G012600.1	GATA-motif	GCGACGTACC	part of a light responsive element
Streb.2G012600.1	ACE	CAAT(A/T)ATTG	part of a light responsive element
Streb.2G012600.1	HD-Zip 1	motif_sequence	cis-acting element involved in light responsiveness
Streb.2G012600.1	TGA-element	AACGAC	element involved in differentiation of the palisade mesophyll cells
Streb.2G012600.1	TGA-element	CGTCA	auxin-responsive element
Streb.2G012600.1	CGTCA-motif	CGTCA	auxin-responsive element
Streb.2G012600.1	CGTCA-motif	CAAAGATATC	cis-acting regulatory element involved in the MeJA-responsiveness
Streb.2G012600.1	circadian	CCGAAA	cis-acting regulatory element involved in the MeJA-responsiveness
Streb.2G012600.1	LTR	CCGAAA	cis-acting regulatory element involved in circadian control
Streb.2G012600.1	LTR	TCTCCCT	cis-acting element involved in low-temperature responsiveness
Streb.2G013060.1	TCCC-motif	TGACG	cis-acting element involved in low-temperature responsiveness
Streb.2G013060.1	TGACG-motif	CTTTATCA	part of a light responsive element
Streb.2G013060.1	LAMP-element	TACGTG	cis-acting regulatory element involved in the MeJA-responsiveness
Streb.2G013060.1	G-box	GTTTTCTTAC	part of a light responsive element
Streb.2G013060.1	TC-rich repeats	TATAAA	cis-acting regulatory element involved in light responsiveness
Streb.2G013060.1	CAT-box	CCAAT	cis-acting element involved in defense and stress responsiveness
Streb.2G013060.1	CAAT-box	AATCTAATCC	cis-acting regulatory element related to meristem expression
Streb.2G013060.1	ATCT-motif	AAGATAAGATT	part of a conserved DNA module involved in light responsiveness
Streb.2G013060.1	GATA-motif	GCGACGTACC	part of a conserved DNA module involved in light responsiveness
Streb.2G013060.1	ACE	TATCCCA	part of a light responsive element
Streb.2G013060.1	TATC-box	TCTTAC	cis-acting element involved in light responsiveness
Streb.2G013060.1	TCT-motif	TCTTAC	cis-acting element involved in gibberellin-responsiveness
Streb.2G013060.1	TCT-motif	ACGTG	part of a light responsive element
Streb.2G013060.1	ABRE	CCATCTTTTT	part of a light responsive element
Streb.2G013060.1	TCA-element	TCAGAAGAGG	cis-acting element involved in the abscisic acid responsiveness
Streb.2G013060.1	TCA-element	AAACCA	cis-acting element involved in salicylic acid responsiveness
Streb.2G013060.1	ARE	AAACCA	cis-acting element involved in salicylic acid responsiveness
Streb.2G013060.1	ARE	AAACCA	cis-acting regulatory element essential for the anaerobic induction
Streb.2G013060.1	ARE	AACGAC	cis-acting regulatory element essential for the anaerobic induction
Streb.2G013060.1	TGA-element	CGTCA	cis-acting regulatory element essential for the anaerobic induction
Streb.2G013060.1	CGTCA-motif	CCGAAA	auxin-responsive element
Streb.2G013060.1	LTR	CCGAAA	cis-acting regulatory element involved in the MeJA-responsiveness
Streb.2G013060.1	LTR	CAAAGATATC	cis-acting element involved in low-temperature responsiveness
Streb.2G013060.1	circadian	CAAT(A/T)ATTG	cis-acting element involved in low-temperature responsiveness
Streb.2G013060.1	HD-Zip 1	motif_sequence	cis-acting regulatory element involved in circadian control
Streb.2G013100.1	G-Box	CACGTT	element involved in differentiation of the palisade mesophyll cells
Streb.2G013100.1	G-Box	CAAAT	cis-acting regulatory element involved in light responsiveness
Streb.2G013100.1	CAAT-box	CCTTTTG	cis-acting regulatory element involved in light responsiveness
Streb.2G013100.1	P-box	CCTTTTG	gibberellin-responsive element
Streb.2G013100.1	P-box	TGACG	gibberellin-responsive element
Streb.2G013100.1	TGACG-motif	GGTTAA	gibberellin-responsive element
Streb.2G013100.1	GT1-motif	GGTTAAT	cis-acting regulatory element involved in the MeJA-responsiveness
Streb.2G013100.1	GT1-motif	ACACGTGT	light responsive element
Streb.2G013100.1	G-box	CACGTG	light responsive element
Streb.2G013100.1	G-box	CAACTG	cis-acting regulatory element involved in light responsiveness
Streb.2G013100.1	MBS	CAACTG	cis-acting regulatory element involved in light responsiveness
Streb.2G013100.1	MBS	GGTCCAT	MYB binding site involved in drought-inducibility
Streb.2G013100.1	AuxRR-core	CCGAAA	MYB binding site involved in drought-inducibility
Streb.2G013100.1	LTR	CAAAGATATC	cis-acting regulatory element involved in auxin responsiveness
Streb.2G013100.1	circadian	CGTCA	cis-acting element involved in low-temperature responsiveness
Streb.2G013100.1	CGTCA-motif	motif_sequence	cis-acting regulatory element involved in circadian control
Streb.2G013100.1	Box 4	ATTAAT	cis-acting regulatory element involved in the MeJA-responsiveness
Streb.2G013100.1	Box 4	GATAGGG	part of a conserved DNA module involved in light responsiveness
Streb.2G013100.1	GATA-motif	CACGTG	part of a conserved DNA module involved in light responsiveness
Streb.2G013100.1	ABRE	ACGTG	part of a light responsive element
Streb.2G013100.1	ABRE	ACGTG	cis-acting element involved in the abscisic acid responsiveness
Streb.2G013100.1	ABRE	AAACCA	cis-acting element involved in the abscisic acid responsiveness
Streb.2G013100.1	ARE	AAACCA	cis-acting element involved in the abscisic acid responsiveness
Streb.2G013100.1	ARE	AAACCA	cis-acting regulatory element essential for the anaerobic induction
Streb.2G013100.1	ARE	CAAAT	cis-acting regulatory element essential for the anaerobic induction
Streb.2G017730.1	CAAT-box	CACGTG	cis-acting regulatory element essential for the anaerobic induction
Streb.2G017730.1	G-Box	CAAATGAA(A/G)A	part of a light responsive element
Streb.2G017730.1	Gap-box	ATCCCACCTAC	cis-acting regulatory element involved in light responsiveness
Streb.2G017730.1	L-box	TATA	part of a light responsive element
Streb.2G017730.1	TGACG-motif	GGTTAA	part of a light responsive element
Streb.2G017730.1	GT1-motif	GTTTTCTTAC	cis-acting regulatory element involved in the MeJA-responsiveness
Streb.2G017730.1	TC-rich repeats	CAACTG	light responsive element
Streb.2G017730.1	MBS	GATGATGTGG	cis-acting element involved in defense and stress responsiveness
Streb.2G017730.1	O2-site	CACGTG	MYB binding site involved in drought-inducibility
Streb.2G017730.1	G-box	CACGAC	cis-acting regulatory element involved in zein metabolism regulation
Streb.2G017730.1	G-box	TACGTG	cis-acting regulatory element involved in light responsiveness
Streb.2G017730.1	G-box	CCTTATCCA	cis-acting regulatory element involved in light responsiveness
Streb.2G017730.1	LAMP-element	CGTCA	cis-acting regulatory element involved in light responsiveness
Streb.2G017730.1	CGTCA-motif	AACGAC	part of a light responsive element
Streb.2G017730.1	TGA-element	ATTAAT	cis-acting regulatory element involved in the MeJA-responsiveness
Streb.2G017730.1	Box 4	motif_sequence	auxin-responsive element
Streb.2G017730.1	ABRE	ACGTG	part of a conserved DNA module involved in light responsiveness
Streb.2G017730.1	ABRE	GCCGCGTGGC	cis-acting element involved in the abscisic acid responsiveness
Streb.2G017730.1	ABRE	ACGTG	cis-acting element involved in the abscisic acid responsiveness
Streb.2G017730.1	ABRE	TCTTAC	cis-acting element involved in the abscisic acid responsiveness
Streb.2G017730.1	TCT-motif	AAGGATAAGG	cis-acting element involved in the abscisic acid responsiveness
Streb.2G017730.1	GATA-motif	AAACCA	part of a light responsive element
Streb.2G017730.1	ARE	AAACCA	part of a light responsive element
Streb.2G017730.1	ARE	AAACCA	cis-acting regulatory element essential for the anaerobic induction
Streb.2G017730.1	ARE	AAACCA	cis-acting regulatory element essential for the anaerobic induction
Streb.2G017730.1	ARE	AAACCA	cis-acting regulatory element essential for the anaerobic induction
Streb.2G017730.1	ARE	AAACCA	cis-acting regulatory element essential for the anaerobic induction
Streb.2G017730.1	ARE	AAACCA	cis-acting regulatory element essential for the anaerobic induction
Streb.2G017730.1	ARE	AAACCA	cis-acting regulatory element essential for the anaerobic induction
Streb.2G017730.1	ARE	ATAGAAATCAA	cis-acting regulatory element essential for the anaerobic induction
Streb.2G017730.1	AT-rich element	TGAGTCA	cis-acting regulatory element essential for the anaerobic induction
Streb.2G017730.1	GCN4_motif	(T/C)C(T/C)AACGG(T/C)(T/C)A	binding site of AT-rich DNA binding protein (ATBP-1)
Streb.2G036150.1	MSA-like	CGTCA	cis-regulatory element involved in endosperm expression
Streb.2G036150.1	CGTCA-motif	CGTCA	cis-acting element involved in cell cycle regulation
Streb.2G036150.1	CGTCA-motif	motif_sequence	cis-acting regulatory element involved in the MeJA-responsiveness
Streb.2G036150.1	Box 4	ATTAAT	cis-acting regulatory element involved in the MeJA-responsiveness
Streb.2G036150.1	Box 4	ACGTG	part of a conserved DNA module involved in light responsiveness
Streb.2G036150.1	ABRE	ACGTG	part of a conserved DNA module involved in light responsiveness
Streb.2G036150.1	ABRE	ACGTG	cis-acting element involved in the abscisic acid responsiveness
Streb.2G036150.1	ABRE	AACCCGG	cis-acting element involved in the abscisic acid responsiveness
Streb.2G036150.1	ABRE	CACGTG	cis-acting element involved in the abscisic acid responsiveness
Streb.2G036150.1	ABRE	ACGTG	cis-acting element involved in the abscisic acid responsiveness
Streb.2G036150.1	ABRE	TCTTAC	cis-acting element involved in the abscisic acid responsiveness
Streb.2G036150.1	TCT-motif	AAACCA	cis-acting element involved in the abscisic acid responsiveness
Streb.2G036150.1	ARE	AAACCA	part of a light responsive element
Streb.2G036150.1	ARE	AAACCA	cis-acting regulatory element essential for the anaerobic induction
Streb.2G036150.1	ARE	TAAAGATT	cis-acting regulatory element essential for the anaerobic induction
Streb.2G036150.1	CAAT-box	CCTTTTG	cis-acting regulatory element essential for the anaerobic induction
Streb.2G036150.1	P-box	TGGTAATAA	cis-acting regulatory element involved in light responsiveness
Streb.2G036150.1	Box II	TGACG	gibberellin-responsive element
Streb.2G036150.1	TGACG-motif	TGACG	part of a light responsive element
Streb.2G036150.1	TGACG-motif	CAACGG	cis-acting regulatory element involved in the MeJA-responsiveness
Streb.2G036150.1	CCAAT-box	CAACTG	cis-acting regulatory element involved in the MeJA-responsiveness
Streb.2G036150.1	MBS	TACGTG	MYBHv1 binding site
Streb.2G036150.1	G-box	CACGTC	MYB binding site involved in drought-inducibility
Streb.2G036150.1	G-box	CACGTC	cis-acting regulatory element involved in light responsiveness
Streb.2G036150.1	G-box	CACGTG	cis-acting regulatory element involved in light responsiveness
Streb.2G036150.1	G-box	ATAGATAA	cis-acting regulatory element involved in light responsiveness
Streb.2G036150.1	GA-motif	aaaAaaC(G/C)GTTA	cis-acting regulatory element involved in light responsiveness
Streb.2G043690.1	MBSI	GGTTAA	part of a light responsive element
Streb.2G043690.1	GT1-motif	TGACG	MYB binding site involved in flavonoid biosynthetic genes regulation
Streb.2G043690.1	TGACG-motif	TGACG	light responsive element
Streb.2G043690.1	TGACG-motif	ATTCTCTAAC	cis-acting regulatory element involved in the MeJA-responsiveness
Streb.2G043690.1	TC-rich repeats	ATTCTCTAAC	cis-acting regulatory element involved in the MeJA-responsiveness
Streb.2G043690.1	TC-rich repeats	CAACTG	cis-acting element involved in defense and stress responsiveness
Streb.2G043690.1	MBS	CAACTG	cis-acting element involved in defense and stress responsiveness
Streb.2G043690.1	MBS	CAACTG	MYB binding site involved in drought-inducibility
Streb.2G043690.1	MBS	GATGACATGG	MYB binding site involved in drought-inducibility
Streb.2G043690.1	O2-site	CAAAT	MYB binding site involved in drought-inducibility
Streb.2G043690.1	CAAT-box	CCTTTTG	cis-acting regulatory element involved in zein metabolism regulation
Streb.2G043690.1	P-box	TGAGTCA	gibberellin-responsive element
Streb.2G043690.1	GCN4_motif	AAACCA	gibberellin-responsive element
Streb.2G043690.1	ARE	AAACCA	cis-regulatory element involved in endosperm expression
Streb.2G043690.1	ARE	CGTCA	cis-acting regulatory element essential for the anaerobic induction
Streb.2G043690.1	CGTCA-motif	CGTCA	cis-acting regulatory element essential for the anaerobic induction
Streb.2G043690.1	CGTCA-motif	ATTAAT	cis-acting regulatory element involved in the MeJA-responsiveness
Streb.2G043690.1	Box 4	AGAAACAA	cis-acting regulatory element involved in the MeJA-responsiveness
Streb.2G043690.1	AE-box	motif_sequence	part of a conserved DNA module involved in light responsiveness
Streb.2G044080.1	CAAT-box	TGACG	part of a module for light response
Streb.2G044080.1	TGACG-motif	TGACG	part of a light responsive element
Streb.2G044080.1	TGACG-motif	TGACG	cis-acting regulatory element involved in the MeJA-responsiveness
Streb.2G044080.1	TGACG-motif	TGACG	cis-acting regulatory element involved in the MeJA-responsiveness
Streb.2G044080.1	TGACG-motif	TGACG	cis-acting regulatory element involved in the MeJA-responsiveness
Streb.2G044080.1	TGACG-motif	GGTTAA	cis-acting regulatory element involved in the MeJA-responsiveness
Streb.2G044080.1	GT1-motif	CAACGG	cis-acting regulatory element involved in the MeJA-responsiveness
Streb.2G044080.1	CCAAT-box	CAACGG	light responsive element
Streb.2G044080.1	CCAAT-box	CACGAC	MYBHv1 binding site
Streb.2G044080.1	G-box	GATGA(C/T)(A/G)TG(A/G)	MYBHv1 binding site
Streb.2G044080.1	O2-site	GTTTTCTTAC	cis-acting regulatory element involved in light responsiveness
Streb.2G044080.1	TC-rich repeats	CGTCA	cis-acting regulatory element involved in zein metabolism regulation
Streb.2G044080.1	CGTCA-motif	CGTCA	cis-acting element involved in defense and stress responsiveness
Streb.2G044080.1	CGTCA-motif	CGTCA	cis-acting regulatory element involved in the MeJA-responsiveness
Streb.2G044080.1	CGTCA-motif	CGTCA	cis-acting regulatory element involved in the MeJA-responsiveness
Streb.2G044080.1	CGTCA-motif	CGTCA	cis-acting regulatory element involved in the MeJA-responsiveness
Streb.2G044080.1	CGTCA-motif	AACGAC	cis-acting regulatory element involved in the MeJA-responsiveness
Streb.2G044080.1	TGA-element	motif_sequence	cis-acting regulatory element involved in the MeJA-responsiveness
Streb.2G044080.1	AE-box	GACACGTACGT	auxin-responsive element
Streb.2G044080.1	ABRE	GACACGTGGC	part of a module for light response
Streb.2G044080.1	ABRE	AAACCA	cis-acting element involved in the abscisic acid responsiveness
Streb.2G044080.1	ARE	AAACCA	cis-acting element involved in the abscisic acid responsiveness
Streb.2G044080.1	ARE	AAACCA	cis-acting regulatory element essential for the anaerobic induction
Streb.2G044080.1	ARE	AAACCA	cis-acting regulatory element essential for the anaerobic induction
Streb.2G044080.1	ARE	TGAGTCA	cis-acting regulatory element essential for the anaerobic induction
Streb.2G044080.1	GCN4_motif	ATTCTCTAAC	cis-acting regulatory element essential for the anaerobic induction
Streb.2G044340.1	TC-rich repeats	CAACTG	cis-regulatory element involved in endosperm expression
Streb.2G044340.1	MBS	CAACTG	cis-acting element involved in defense and stress responsiveness
Streb.2G044340.1	MBS	CAACTG	MYB binding site involved in drought-inducibility
Streb.2G044340.1	MBS	GATGATGTGG	MYB binding site involved in drought-inducibility
Streb.2G044340.1	O2-site	ACACGTGT	MYB binding site involved in drought-inducibility
Streb.2G044340.1	G-box	CACGTG	cis-acting regulatory element involved in zein metabolism regulation
Streb.2G044340.1	G-box	GGTTAA	cis-acting regulatory element involved in light responsiveness
Streb.2G044340.1	GT1-motif	GGTTAAT	cis-acting regulatory element involved in light responsiveness
Streb.2G044340.1	GT1-motif	GGTTAA	light responsive element
Streb.2G044340.1	GT1-motif	AACCTAA	light responsive element
Streb.2G044340.1	MRE	CCAAT	light responsive element
Streb.2G044340.1	CAAT-box	GCCACT	MYB binding site involved in light responsiveness
Streb.2G044340.1	CAT-box	ATATAT	cis-acting regulatory element involved in light responsiveness
Streb.2G044340.1	AuxRE	AAACCA	cis-acting regulatory element related to meristem expression
Streb.2G044340.1	ARE	AAACCA	part of an auxin-responsive element
Streb.2G044340.1	ARE	CCATCTTTTT	cis-acting regulatory element essential for the anaerobic induction
Streb.2G044340.1	TCA-element	TCAGAAGAGG	cis-acting regulatory element essential for the anaerobic induction
Streb.2G044340.1	TCA-element	CAATCAAAACCT	cis-acting element involved in salicylic acid responsiveness
Streb.2G044340.1	AAAC-motif	CACGTG	cis-acting element involved in salicylic acid responsiveness
Streb.2G044340.1	ABRE	ACGTG	light responsive element
Streb.2G044340.1	ABRE	ATTAAT	cis-acting element involved in the abscisic acid responsiveness
Streb.2G044340.1	Box 4	motif_sequence	cis-acting element involved in the abscisic acid responsiveness
Streb.2G044340.1	circadian	CCGAAA	part of a conserved DNA module involved in light responsiveness
Streb.2G044340.1	LTR	AACGAC	cis-acting regulatory element involved in circadian control
Streb.2G044340.1	TGA-element	AACGAC	cis-acting element involved in low-temperature responsiveness
Streb.2G044340.1	TGA-element	GGTTAA	auxin-responsive element
Streb.2G044370.1	GT1-motif	GGTTAAT	auxin-responsive element
Streb.2G044370.1	GT1-motif	GGTTAA	light responsive element
Streb.2G044370.1	GT1-motif	CAACTG	light responsive element
Streb.2G044370.1	MBS	CAACTG	light responsive element
Streb.2G044370.1	MBS	CAACTG	MYB binding site involved in drought-inducibility
Streb.2G044370.1	MBS	ACACGTGT	MYB binding site involved in drought-inducibility
Streb.2G044370.1	G-box	CACGTG	MYB binding site involved in drought-inducibility
Streb.2G044370.1	G-box	GATGATGTGG	cis-acting regulatory element involved in light responsiveness
Streb.2G044370.1	O2-site	ATTCTCTAAC	cis-acting regulatory element involved in light responsiveness
Streb.2G044370.1	TC-rich repeats	GCCACT	cis-acting regulatory element involved in zein metabolism regulation
Streb.2G044370.1	CAT-box	ATATAT	cis-acting element involved in defense and stress responsiveness
Streb.2G044370.1	CAAT-box	AACCTAA	cis-acting regulatory element related to meristem expression
Streb.2G044370.1	MRE	CACGTG	cis-acting regulatory element involved in light responsiveness
Streb.2G044370.1	ABRE	ACGTG	MYB binding site involved in light responsiveness
Streb.2G044370.1	ABRE	CCATCTTTTT	cis-acting element involved in the abscisic acid responsiveness
Streb.2G044370.1	TCA-element	TCAGAAGAGG	cis-acting element involved in the abscisic acid responsiveness
Streb.2G044370.1	TCA-element	CAATCAAAACCT	cis-acting element involved in salicylic acid responsiveness
Streb.2G044370.1	AAAC-motif	AAACCA	cis-acting element involved in salicylic acid responsiveness
Streb.2G044370.1	ARE	AAACCA	light responsive element
Streb.2G044370.1	ARE	TGTCTCAATAAG	cis-acting regulatory element essential for the anaerobic induction
Streb.2G044370.1	AuxRE	CCGAAA	cis-acting regulatory element essential for the anaerobic induction
Streb.2G044370.1	LTR	CAAAGATATC	part of an auxin-responsive element
Streb.2G044370.1	circadian	AACGAC	cis-acting element involved in low-temperature responsiveness
Streb.2G044370.1	TGA-element	AACGAC	cis-acting regulatory element involved in circadian control
Streb.2G044370.1	TGA-element	motif_sequence	auxin-responsive element
Streb.2G044370.1	Box 4	TGACG	auxin-responsive element
Streb.2G045420.1	TGACG-motif	TCTCCCT	part of a conserved DNA module involved in light responsiveness
Streb.2G045420.1	TCCC-motif	TCTCCCT	cis-acting regulatory element involved in the MeJA-responsiveness
Streb.2G045420.1	TCCC-motif	TCTCCCT	part of a light responsive element
Streb.2G045420.1	TCCC-motif	GGTTAA	part of a light responsive element
Streb.2G045420.1	GT1-motif	CAACTG	part of a light responsive element
Streb.2G045420.1	MBS	CAAAT	light responsive element
Streb.2G045420.1	CAAT-box	AACCTAA	MYB binding site involved in drought-inducibility
Streb.2G045420.1	MRE	AATCTAATCC	MYB binding site involved in light responsiveness
Streb.2G045420.1	ATCT-motif	TATCCCA	MYB binding site involved in light responsiveness
Streb.2G045420.1	TATC-box	TCTTAC	part of a conserved DNA module involved in light responsiveness
Streb.2G045420.1	TCT-motif	AAGGATAAGG	cis-acting element involved in gibberellin-responsiveness
Streb.2G045420.1	GATA-motif	AAACCA	part of a light responsive element
Streb.2G045420.1	ARE	AAACCA	part of a light responsive element
Streb.2G045420.1	ARE	CGTCA	cis-acting regulatory element essential for the anaerobic induction
Streb.2G045420.1	CGTCA-motif	ATTAAT	cis-acting regulatory element essential for the anaerobic induction
Streb.2G045420.1	Box 4	ATTAAT	cis-acting regulatory element involved in the MeJA-responsiveness
Streb.2G045420.1	Box 4	ATTAAT	part of a conserved DNA module involved in light responsiveness
Streb.2G045420.1	Box 4	motif_sequence	part of a conserved DNA module involved in light responsiveness
Streb.2G045590.1	ARE	AAACCA	part of a conserved DNA module involved in light responsiveness
Streb.2G045590.1	ARE	TATCCCA	cis-acting regulatory element essential for the anaerobic induction
Streb.2G045590.1	TATC-box	TCTTAC	cis-acting regulatory element essential for the anaerobic induction
Streb.2G045590.1	TCT-motif	ACGTG	cis-acting element involved in gibberellin-responsiveness
Streb.2G045590.1	ABRE	motif_sequence	part of a light responsive element
Streb.2G045590.1	Box 4	ATTAAT	cis-acting element involved in the abscisic acid responsiveness
Streb.2G045590.1	Box 4	ATTAAT	part of a conserved DNA module involved in light responsiveness
Streb.2G045590.1	Box 4	CGTCA	part of a conserved DNA module involved in light responsiveness
Streb.2G045590.1	CGTCA-motif	GGTTAA	part of a conserved DNA module involved in light responsiveness
Streb.2G045590.1	GT1-motif	TGACG	cis-acting regulatory element involved in the MeJA-responsiveness
Streb.2G045590.1	TGACG-motif	TCTCCCT	light responsive element
Streb.2G045590.1	TCCC-motif	TCTCCCT	cis-acting regulatory element involved in the MeJA-responsiveness
Streb.2G045590.1	TCCC-motif	TCTCCCT	part of a light responsive element
Streb.2G045590.1	TCCC-motif	AACCTAA	part of a light responsive element
Streb.2G045590.1	MRE	AACCTAA	part of a light responsive element
Streb.2G045590.1	MRE	AATCTAATCC	MYB binding site involved in light responsiveness
Streb.2G045590.1	ATCT-motif	ATATAA	MYB binding site involved in light responsiveness
Streb.2G045590.1	G-Box	CAAAT	part of a conserved DNA module involved in light responsiveness
Streb.2G045590.1	CAAT-box	TCTTAC	cis-acting regulatory element involved in light responsiveness
Streb.2G045750.1	TCT-motif	TATCCCA	cis-acting element involved in the abscisic acid responsiveness
Streb.2G045750.1	TATC-box	AAACCA	part of a light responsive element
Streb.2G045750.1	ARE	AAACCA	cis-acting element involved in gibberellin-responsiveness
Streb.2G045750.1	ARE	CGTCA	cis-acting regulatory element essential for the anaerobic induction
Streb.2G045750.1	CGTCA-motif	motif_sequence	cis-acting regulatory element essential for the anaerobic induction
Streb.2G045750.1	Box 4	ATTAAT	cis-acting regulatory element involved in the MeJA-responsiveness
Streb.2G045750.1	Box 4	ATTAAT	part of a conserved DNA module involved in light responsiveness
Streb.2G045750.1	Box 4	GGTTAA	part of a conserved DNA module involved in light responsiveness
Streb.2G045750.1	GT1-motif	TCTCCCT	part of a conserved DNA module involved in light responsiveness
Streb.2G045750.1	TCCC-motif	TCTCCCT	light responsive element
Streb.2G045750.1	TCCC-motif	TGACG	part of a light responsive element
Streb.2G045750.1	TGACG-motif	ATATAA	part of a light responsive element
Streb.2G045750.1	CAAT-box	AATCTAATCC	cis-acting regulatory element involved in the MeJA-responsiveness
Streb.2G045750.1	ATCT-motif	AACCTAA	cis-acting regulatory element involved in light responsiveness
Streb.2G045750.1	MRE	AACCTAA	part of a conserved DNA module involved in light responsiveness
Streb.2G045750.1	MRE	ATTAAT	MYB binding site involved in light responsiveness
Streb.2G046520.1	Box 4	ATTAAT	MYB binding site involved in light responsiveness
Streb.2G046520.1	Box 4	ATTAAT	part of a conserved DNA module involved in light responsiveness
Streb.2G046520.1	Box 4	ATTAAT	part of a conserved DNA module involved in light responsiveness
Streb.2G046520.1	Box 4	motif_sequence	part of a conserved DNA module involved in light responsiveness
Streb.2G046520.1	CGTCA-motif	CCGAAA	part of a conserved DNA module involved in light responsiveness
Streb.2G046520.1	LTR	CAAAGATATC	cis-acting regulatory element involved in the MeJA-responsiveness
Streb.2G046520.1	circadian	AAACCA	cis-acting element involved in low-temperature responsiveness
Streb.2G046520.1	ARE	ACGTG	cis-acting regulatory element involved in circadian control
Streb.2G046520.1	ABRE	AACCCGG	cis-acting regulatory element essential for the anaerobic induction
Streb.2G046520.1	ABRE	CCGTCC	cis-acting element involved in the abscisic acid responsiveness
Streb.2G046520.1	A-box	AATCTAATCC	cis-acting element involved in the abscisic acid responsiveness
Streb.2G046520.1	ATCT-motif	CACGTT	cis-acting regulatory element
Streb.2G046520.1	G-Box	CAAAT	part of a conserved DNA module involved in light responsiveness
Streb.2G046520.1	CAAT-box	ATAGATAA	cis-acting regulatory element involved in light responsiveness
Streb.2G046520.1	GA-motif	GGTTAA	part of a light responsive element
Streb.2G046520.1	GT1-motif	GGTTAAT	part of a light responsive element
Streb.2G046520.1	GT1-motif	GGTTAAT	light responsive element
Streb.2G046520.1	GT1-motif	GGTTAA	light responsive element
Streb.2G046520.1	GT1-motif	TGACG	light responsive element
Streb.2G046520.1	TGACG-motif	ATAGAAATCAA	light responsive element
Streb.2G047250.1	AT-rich element	AAACCA	cis-acting regulatory element involved in the MeJA-responsiveness
Streb.2G047250.1	ARE	AAACCA	binding site of AT-rich DNA binding protein (ATBP-1)
Streb.2G047250.1	ARE	ACGTG	cis-acting regulatory element essential for the anaerobic induction
Streb.2G047250.1	ABRE	GATAGGG	cis-acting regulatory element essential for the anaerobic induction
Streb.2G047250.1	GATA-motif	ATTAAT	cis-acting element involved in the abscisic acid responsiveness
Streb.2G047250.1	Box 4	ATTAAT	part of a light responsive element
Streb.2G047250.1	Box 4	ATTAAT	part of a conserved DNA module involved in light responsiveness
Streb.2G047250.1	Box 4	motif_sequence	part of a conserved DNA module involved in light responsiveness
Streb.2G047250.1	CGTCA-motif	CGTCA	part of a conserved DNA module involved in light responsiveness
Streb.2G047250.1	CGTCA-motif	CAAAGATATC	cis-acting regulatory element involved in the MeJA-responsiveness
Streb.2G047250.1	circadian	GTTTTCTTAC	cis-acting regulatory element involved in the MeJA-responsiveness
Streb.2G047250.1	TC-rich repeats	ATTCTCTAAC	cis-acting regulatory element involved in circadian control
Streb.2G047250.1	TC-rich repeats	ATTCTCTAAC	cis-acting element involved in defense and stress responsiveness
Streb.2G047250.1	TC-rich repeats	CAACGG	cis-acting element involved in defense and stress responsiveness
Streb.2G047250.1	CCAAT-box	GGTTAA	cis-acting element involved in defense and stress responsiveness
Streb.2G047250.1	GT1-motif	GGTTAA	MYBHv1 binding site
Streb.2G047250.1	GT1-motif	TGACG	light responsive element
Streb.2G047250.1	TGACG-motif	TGACG	light responsive element
Streb.2G047250.1	TGACG-motif	CAAATGAA(A/G)A	cis-acting regulatory element involved in the MeJA-responsiveness
Streb.2G047250.1	Gap-box	CACGTT	cis-acting regulatory element involved in the MeJA-responsiveness
Streb.2G047250.1	G-Box	gGATAAGGTG	part of a light responsive element
Streb.2G047250.1	I-box	gGATAAGGTG	cis-acting regulatory element involved in light responsiveness
Streb.2G047250.1	I-box	CAAAT	part of a light responsive element
Streb.2G047250.1	CAAT-box	CCAAT	part of a light responsive element
Streb.2G049130.1	CAAT-box	CACGTG	cis-acting regulatory element related to meristem expression
Streb.2G049130.1	G-Box	TCACTTGA	cis-acting regulatory element involved in light responsiveness
Streb.2G049130.1	chs-CMA2a	GCCACT	cis-acting regulatory element involved in light responsiveness
Streb.2G049130.1	CAT-box	TACATAAA	part of a light responsive element
Streb.2G049130.1	A-box	GGTTAA	cis-acting regulatory element related to meristem expression
Streb.2G049130.1	GT1-motif	TGACG	cis-acting regulatory element
Streb.2G049130.1	TGACG-motif	TGACG	light responsive element
Streb.2G049130.1	TGACG-motif	TGACG	cis-acting regulatory element involved in the MeJA-responsiveness
Streb.2G049130.1	TGACG-motif	GTTTTCTTAC	cis-acting regulatory element involved in the MeJA-responsiveness
Streb.2G049130.1	TC-rich repeats	CTTTATCA	cis-acting regulatory element involved in the MeJA-responsiveness
Streb.2G049130.1	LAMP-element	GCCACGTGGA	cis-acting element involved in defense and stress responsiveness
Streb.2G049130.1	G-box	CACGTG	part of a light responsive element
Streb.2G049130.1	G-box	CGTCA	cis-acting regulatory element involved in light responsiveness
Streb.2G049130.1	CGTCA-motif	CGTCA	cis-acting regulatory element involved in light responsiveness
Streb.2G049130.1	CGTCA-motif	CGTCA	cis-acting regulatory element involved in the MeJA-responsiveness
Streb.2G049130.1	CGTCA-motif	ATTAAT	cis-acting regulatory element involved in the MeJA-responsiveness
Streb.2G049130.1	Box 4	ATTAAT	cis-acting regulatory element involved in the MeJA-responsiveness
Streb.2G049130.1	Box 4	ATTAAT	part of a conserved DNA module involved in light responsiveness
Streb.2G049130.1	Box 4	ATTAAT	part of a conserved DNA module involved in light responsiveness
Streb.2G049130.1	Box 4	ATTAAT	part of a conserved DNA module involved in light responsiveness
Streb.2G049130.1	Box 4	motif_sequence	part of a conserved DNA module involved in light responsiveness
Streb.2G049130.1	Sp1	TACGGTC	part of a conserved DNA module involved in light responsiveness
Streb.2G049130.1	ABRE	CGTACGTGCA	light responsive element
Streb.2G049130.1	ABRE	CACGTG	cis-acting element involved in the abscisic acid responsiveness
Streb.2G049130.1	ABRE	ACGTG	cis-acting element involved in the abscisic acid responsiveness
Streb.2G049130.1	ABRE	TCTTAC	cis-acting element involved in the abscisic acid responsiveness
Streb.2G049130.1	TCT-motif	TCTTAC	cis-acting element involved in the abscisic acid responsiveness
Streb.2G049130.1	TCT-motif	TTACTTAA	part of a light responsive element
Streb.2G049130.1	chs-CMA1a	TGAGTCA	part of a light responsive element
Streb.2G049130.1	GCN4_motif	AAACCA	part of a light responsive element
Streb.2G049130.1	ARE	CCATCTTTTT	cis-regulatory element involved in endosperm expression
Streb.2G049130.1	TCA-element	TTTTTACGGTTA	cis-acting regulatory element essential for the anaerobic induction
Streb.2G058200.1	MBSI	TGACG	cis-acting element involved in salicylic acid responsiveness
Streb.2G058200.1	TGACG-motif	GGTTAA	MYB binding site involved in flavonoid biosynthetic genes regulation
Streb.2G058200.1	GT1-motif	GTTTTCTTAC	cis-acting regulatory element involved in the MeJA-responsiveness
Streb.2G058200.1	TC-rich repeats	ATTCTCTAAC	light responsive element
Streb.2G058200.1	TC-rich repeats	CAACTG	cis-acting element involved in defense and stress responsiveness
Streb.2G058200.1	MBS	CAACTG	cis-acting element involved in defense and stress responsiveness
Streb.2G058200.1	MBS	ATAGATAA	MYB binding site involved in drought-inducibility
Streb.2G058200.1	GA-motif	CACGTC	MYB binding site involved in drought-inducibility
Streb.2G058200.1	G-box	CAAAT	part of a light responsive element
Streb.2G058200.1	CAAT-box	TATA	cis-acting regulatory element involved in light responsiveness
Streb.2G058200.1	A-box	ACGTG	part of a light responsive element
Streb.2G058200.1	ABRE	TCTTAC	cis-acting regulatory element
Streb.2G058200.1	TCT-motif	TCTTAC	cis-acting element involved in the abscisic acid responsiveness
Streb.2G058200.1	TCT-motif	TTACTTAA	part of a light responsive element
Streb.2G058200.1	chs-CMA1a	AAACCA	part of a light responsive element
Streb.2G058200.1	ARE	AAACCA	part of a light responsive element
Streb.2G058200.1	ARE	TGAGTCA	cis-acting regulatory element essential for the anaerobic induction
Streb.2G058200.1	GCN4_motif	CGTCA	cis-acting regulatory element essential for the anaerobic induction
Streb.2G058200.1	CGTCA-motif	motif_sequence	cis-regulatory element involved in endosperm expression
Streb.2G058740.1	ARE	GATAGGA	cis-acting regulatory element involved in the MeJA-responsiveness
Streb.2G058740.1	GATA-motif	AAGGATAAGG	cis-acting regulatory element essential for the anaerobic induction
Streb.2G058740.1	GATA-motif	ACGTG	part of a light responsive element
Streb.2G058740.1	ABRE	GCAACGTGTC	part of a light responsive element
Streb.2G058740.1	ABRE	CACGTG	cis-acting element involved in the abscisic acid responsiveness
Streb.2G058740.1	ABRE	ACGTG	cis-acting element involved in the abscisic acid responsiveness
Streb.2G058740.1	ABRE	GAAAGGCAGAC	cis-acting element involved in the abscisic acid responsiveness
Streb.2G058740.1	CAG-motif	ATTAAT	cis-acting element involved in the abscisic acid responsiveness
Streb.2G058740.1	Box 4	CGTCA	part of a light response element
Streb.2G058740.1	CGTCA-motif	TACGTG	part of a conserved DNA module involved in light responsiveness
Streb.2G058740.1	G-box	CACGAC	cis-acting regulatory element involved in the MeJA-responsiveness
Streb.2G058740.1	G-box	tgACACGTGGCA	cis-acting regulatory element involved in light responsiveness
Streb.2G058740.1	G-box	ACACGTGGC	cis-acting regulatory element involved in light responsiveness
Streb.2G058740.1	G-box	CACGTG	cis-acting regulatory element involved in light responsiveness
Streb.2G058740.1	G-box	TATA	cis-acting regulatory element involved in light responsiveness
Streb.2G058740.1	CAAT-box	CACGTG	cis-acting regulatory element involved in light responsiveness
Streb.2G058740.1	G-Box	CCATCTTTTT	part of a light responsive element
Streb.2G058740.1	TCA-element	CTAACGTATT	cis-acting regulatory element involved in light responsiveness
Streb.2G058740.1	ACE	TCTTAC	cis-acting element involved in salicylic acid responsiveness
Streb.2G058740.1	TCT-motif	TCTTAC	cis-acting element involved in light responsiveness
Streb.2G058740.1	TCT-motif	motif_sequence	part of a light responsive element
Streb.2G058740.1	SARE	AACGAC	part of a light responsive element
Streb.2G058740.1	TGA-element	GATGATGTGG	cis-acting element involved in salicylic acid responsiveness
Streb.2G058740.1	O2-site	GATGA(C/T)(A/G)TG(A/G)	auxin-responsive element
Streb.2G058740.1	O2-site	TGACG	cis-acting regulatory element involved in zein metabolism regulation
Streb.2G058740.1	TGACG-motif	GGTTAA	cis-acting regulatory element involved in zein metabolism regulation
Streb.2G058740.1	GT1-motif	CCGAAA	cis-acting regulatory element involved in the MeJA-responsiveness
Streb.3G007530.1	LTR	motif_sequence	light responsive element
Streb.3G007530.1	TCT-motif	ACCTAACCCGG	cis-acting element involved in low-temperature responsiveness
Streb.3G007530.1	chs-Unit 1 m1	CCATCTTTTT	part of a light responsive element
Streb.3G007530.1	TCA-element	AACCTAA	part of a light responsive element
Streb.3G007530.1	MRE	AACCTAA	cis-acting element involved in salicylic acid responsiveness
Streb.3G007530.1	MRE	CCCCCG	MYB binding site involved in light responsiveness
Streb.3G007530.1	GC-motif	CCCCCG	MYB binding site involved in light responsiveness
Streb.3G007530.1	GC-motif	CAACGG	enhancer-like element involved in anoxic specific inducibility
Streb.3G007530.1	CCAAT-box	CAACGG	enhancer-like element involved in anoxic specific inducibility
Streb.3G007530.1	CCAAT-box	TGACG	MYBHv1 binding site
Streb.3G007530.1	TGACG-motif	TGACG	MYBHv1 binding site
Streb.3G007530.1	TGACG-motif	GGTTAA	cis-acting regulatory element involved in the MeJA-responsiveness
Streb.3G007530.1	GT1-motif	ATAGATAA	cis-acting regulatory element involved in the MeJA-responsiveness
Streb.3G007530.1	GA-motif	GTTGACGTGA	light responsive element
Streb.3G007530.1	O2-site	GATGATGTGG	part of a light responsive element
Streb.3G007530.1	O2-site	GATGATGTGG	cis-acting regulatory element involved in zein metabolism regulation
Streb.3G007530.1	O2-site	CGTCA	cis-acting regulatory element involved in zein metabolism regulation
Streb.3G007530.1	CGTCA-motif	CGTCA	cis-acting regulatory element involved in zein metabolism regulation
Streb.3G007530.1	CGTCA-motif	ATTAAT	cis-acting regulatory element involved in the MeJA-responsiveness
Streb.3G007530.1	Box 4	ATTAAT	cis-acting regulatory element involved in the MeJA-responsiveness
Streb.3G007530.1	Box 4	ATTAAT	part of a conserved DNA module involved in light responsiveness
Streb.3G007530.1	Box 4	GGGCGG	part of a conserved DNA module involved in light responsiveness
Streb.3G007530.1	Sp1	CGCACGTGTC	part of a conserved DNA module involved in light responsiveness
Streb.3G007530.1	ABRE	CACGTG	light responsive element
Streb.3G007530.1	ABRE	ACGTG	cis-acting element involved in the abscisic acid responsiveness
Streb.3G007530.1	ABRE	ACGTG	cis-acting element involved in the abscisic acid responsiveness
Streb.3G007530.1	ABRE	ACGTG	cis-acting element involved in the abscisic acid responsiveness
Streb.3G007530.1	ABRE	AAACCA	cis-acting element involved in the abscisic acid responsiveness
Streb.3G007530.1	ARE	AAACCA	cis-acting element involved in the abscisic acid responsiveness
Streb.3G007530.1	ARE	AAACCA	cis-acting regulatory element essential for the anaerobic induction
Streb.3G007530.1	ARE	AAACCA	cis-acting regulatory element essential for the anaerobic induction
Streb.3G007530.1	ARE	CAAAT	cis-acting regulatory element essential for the anaerobic induction
Streb.3G007530.1	CAAT-box	TATAAATA	cis-acting regulatory element essential for the anaerobic induction
Streb.3G007530.1	MBS	CAACTG	cis-acting regulatory element involved in light responsiveness
Streb.3G007530.1	MBS	CACGTG	MYB binding site involved in drought-inducibility
Streb.3G007530.1	G-box	CACGTC	MYB binding site involved in drought-inducibility
Streb.3G007530.1	G-box	TACGTG	cis-acting regulatory element involved in light responsiveness
Streb.3G007530.1	G-box	TCTTAC	cis-acting regulatory element involved in light responsiveness
Streb.3G007840.1	TCT-motif	motif_sequence	cis-acting regulatory element involved in light responsiveness
Streb.3G007840.1	LTR	CCGAAA	part of a light responsive element
Streb.3G007840.1	LTR	AACGAC	cis-acting element involved in low-temperature responsiveness
Streb.3G007840.1	TGA-element	AACGAC	cis-acting element involved in low-temperature responsiveness
Streb.3G007840.1	TGA-element	TCTCCCT	auxin-responsive element
Streb.3G007840.1	TCCC-motif	GGTTAA	auxin-responsive element
Streb.3G007840.1	GT1-motif	GGTTAAT	part of a light responsive element
Streb.3G007840.1	GT1-motif	CAACGG	light responsive element
Streb.3G007840.1	CCAAT-box	CCGTCC	light responsive element
Streb.3G007840.1	A-box	CCCCCG	MYBHv1 binding site
Streb.3G007840.1	GC-motif	CAAATGAA(A/G)A	cis-acting regulatory element
Streb.3G007840.1	Gap-box	AAACCA	enhancer-like element involved in anoxic specific inducibility
Streb.3G007840.1	ARE	GATAGGA	part of a light responsive element
Streb.3G007840.1	GATA-motif	CACGTG	cis-acting regulatory element essential for the anaerobic induction
Streb.3G007840.1	ABRE	ACGTG	part of a light responsive element
Streb.3G007840.1	ABRE	AGAAACAA	cis-acting element involved in the abscisic acid responsiveness
Streb.3G007840.1	AE-box	AGAAACAA	cis-acting element involved in the abscisic acid responsiveness
Streb.3G007840.1	AE-box	ATTAAT	part of a module for light response
Streb.3G007840.1	Box 4	ATTAAT	part of a module for light response
Streb.3G007840.1	Box 4	CAAAGATATC	part of a conserved DNA module involved in light responsiveness
Streb.3G007840.1	circadian	CACGTG	part of a conserved DNA module involved in light responsiveness
Streb.3G007840.1	G-box	CAACTG	cis-acting regulatory element involved in circadian control
Streb.3G007840.1	MBS	GATTCTGTGGC	cis-acting regulatory element involved in light responsiveness
Streb.3G007840.1	GTGGC-motif	TATAAAA	MYB binding site involved in drought-inducibility
Streb.3G007840.1	I-box	TGATAATGT	part of a light responsive element
Streb.3G007840.1	I-box	CACGTG	part of a light responsive element
Streb.3G007840.1	G-Box	CAAAT	part of a light responsive element
Streb.3G007840.1	CAAT-box	AACGAC	cis-acting regulatory element involved in light responsiveness
Streb.3G008130.1	TGA-element	AACGAC	part of a light responsive element
Streb.3G008130.1	TGA-element	CCGAAA	auxin-responsive element
Streb.3G008130.1	LTR	CCGAAA	auxin-responsive element
Streb.3G008130.1	LTR	motif_sequence	cis-acting element involved in low-temperature responsiveness
Streb.3G008130.1	GT1-motif	GGTTAAT	cis-acting element involved in low-temperature responsiveness
Streb.3G008130.1	GT1-motif	TCTCCCT	light responsive element
Streb.3G008130.1	TCCC-motif	CAACGG	light responsive element
Streb.3G008130.1	CCAAT-box	GCCACT	part of a light responsive element
Streb.3G008130.1	CAT-box	CAAATGAA(A/G)A	MYBHv1 binding site
Streb.3G008130.1	Gap-box	CCGTCC	cis-acting regulatory element related to meristem expression
Streb.3G008130.1	A-box	CCCCCG	part of a light responsive element
Streb.3G008130.1	GC-motif	GATAGGA	cis-acting regulatory element
Streb.3G008130.1	GATA-motif	CACGTG	enhancer-like element involved in anoxic specific inducibility
Streb.3G008130.1	ABRE	ACGTG	part of a light responsive element
Streb.3G008130.1	ABRE	AAACCA	cis-acting element involved in the abscisic acid responsiveness
Streb.3G008130.1	ARE	CAAAGATATC	cis-acting element involved in the abscisic acid responsiveness
Streb.3G008130.1	circadian	AGAAACAA	cis-acting regulatory element essential for the anaerobic induction
Streb.3G008130.1	AE-box	AGAAACAA	cis-acting regulatory element involved in circadian control
Streb.3G008130.1	AE-box	ATTAAT	part of a module for light response
Streb.3G008130.1	Box 4	ATTAAT	part of a module for light response
Streb.3G008130.1	Box 4	CACGTG	part of a conserved DNA module involved in light responsiveness
Streb.3G008130.1	G-box	CAACTG	part of a conserved DNA module involved in light responsiveness
Streb.3G008130.1	MBS	TATAAAA	cis-acting regulatory element involved in light responsiveness
Streb.3G008130.1	G-Box	atGATAAGGTC	MYB binding site involved in drought-inducibility
Streb.3G008130.1	I-box	TGATAATGT	cis-acting regulatory element involved in light responsiveness
Streb.3G008130.1	I-box	CAAAT	part of a light responsive element
Streb.3G008130.1	CAAT-box	ATAGATAA	part of a light responsive element
Streb.3G008630.1	GA-motif	GTTGACGTGA	part of a light responsive element
Streb.3G008630.1	O2-site	GATGATGTGG	part of a light responsive element
Streb.3G008630.1	O2-site	GATGATGTGG	cis-acting regulatory element involved in zein metabolism regulation
Streb.3G008630.1	O2-site	CAACGG	cis-acting regulatory element involved in zein metabolism regulation
Streb.3G008630.1	CCAAT-box	CAACGG	cis-acting regulatory element involved in zein metabolism regulation
Streb.3G008630.1	CCAAT-box	TGACG	MYBHv1 binding site
Streb.3G008630.1	TGACG-motif	GGTTAA	MYBHv1 binding site
Streb.3G008630.1	GT1-motif	AACCTAA	cis-acting regulatory element involved in the MeJA-responsiveness
Streb.3G008630.1	MRE	CCCCCG	light responsive element
Streb.3G008630.1	GC-motif	CCCCCG	MYB binding site involved in light responsiveness
Streb.3G008630.1	GC-motif	CCATCTTTTT	enhancer-like element involved in anoxic specific inducibility
Streb.3G008630.1	TCA-element	CCATCTTTTT	enhancer-like element involved in anoxic specific inducibility
Streb.3G008630.1	TCA-element	TCTTAC	cis-acting element involved in salicylic acid responsiveness
Streb.3G008630.1	TCT-motif	TGTAATAATATATTTATATT	cis-acting element involved in salicylic acid responsiveness
Streb.3G008630.1	LTR	AACGAC	part of a light responsive element
Streb.3G008630.1	TGA-element	CAACTG	cis-acting element involved in low-temperature responsiveness
Streb.3G008630.1	MBS	CAACTG	auxin-responsive element
Streb.3G008630.1	MBS	CACGTG	MYB binding site involved in drought-inducibility
Streb.3G008630.1	G-box	CACGTC	MYB binding site involved in drought-inducibility
Streb.3G008630.1	G-box	CAAAT	cis-acting regulatory element involved in light responsiveness
Streb.3G008630.1	CAAT-box	TATAAATA	cis-acting regulatory element involved in light responsiveness
Streb.3G008630.1	ARE	AAACCA	cis-acting regulatory element involved in light responsiveness
Streb.3G008630.1	ARE	AAACCA	cis-acting regulatory element essential for the anaerobic induction
Streb.3G008630.1	ARE	AAACCA	cis-acting regulatory element essential for the anaerobic induction
Streb.3G008630.1	ARE	CGCACGTGTC	cis-acting regulatory element essential for the anaerobic induction
Streb.3G008630.1	ABRE	CACGTG	cis-acting regulatory element essential for the anaerobic induction
Streb.3G008630.1	ABRE	ACGTG	cis-acting element involved in the abscisic acid responsiveness
Streb.3G008630.1	ABRE	ACGTG	cis-acting element involved in the abscisic acid responsiveness
Streb.3G008630.1	ABRE	AAGGATAAGG	cis-acting element involved in the abscisic acid responsiveness
Streb.3G008630.1	GATA-motif	ATTAAT	cis-acting element involved in the abscisic acid responsiveness
Streb.3G008630.1	Box 4	ATTAAT	part of a light responsive element
Streb.3G008630.1	Box 4	ATTAAT	part of a conserved DNA module involved in light responsiveness
Streb.3G008630.1	Box 4	ATTAAT	part of a conserved DNA module involved in light responsiveness
Streb.3G008630.1	Box 4	GGGCGG	part of a conserved DNA module involved in light responsiveness
Streb.3G008630.1	Sp1	CGTCA	part of a conserved DNA module involved in light responsiveness
Streb.3G008630.1	CGTCA-motif	motif_sequence	light responsive element
Streb.3G011120.1	LTR	CGTCA	cis-acting regulatory element involved in the MeJA-responsiveness
Streb.3G011120.1	CGTCA-motif	CGTCA	cis-acting element involved in low-temperature responsiveness
Streb.3G011120.1	CGTCA-motif	CGTCA	cis-acting regulatory element involved in the MeJA-responsiveness
Streb.3G011120.1	CGTCA-motif	CGTCA	cis-acting regulatory element involved in the MeJA-responsiveness
Streb.3G011120.1	CGTCA-motif	ATAGAAATCAA	cis-acting regulatory element involved in the MeJA-responsiveness
Streb.3G011120.1	AT-rich element	AAACCA	cis-acting regulatory element involved in the MeJA-responsiveness
Streb.3G011120.1	ARE	AAACCA	binding site of AT-rich DNA binding protein (ATBP-1)
Streb.3G011120.1	ARE	GATAGGG	cis-acting regulatory element essential for the anaerobic induction
Streb.3G011120.1	GATA-motif	AAGATAAGATT	cis-acting regulatory element essential for the anaerobic induction
Streb.3G011120.1	GATA-motif	ACGTG	part of a light responsive element
Streb.3G011120.1	ABRE	ACGTG	part of a light responsive element
Streb.3G011120.1	ABRE	GACACGTGGC	cis-acting element involved in the abscisic acid responsiveness
Streb.3G011120.1	ABRE	CACGTG	cis-acting element involved in the abscisic acid responsiveness
Streb.3G011120.1	ABRE	ACGTG	cis-acting element involved in the abscisic acid responsiveness
Streb.3G011120.1	ABRE	AACCTAA	cis-acting element involved in the abscisic acid responsiveness
Streb.3G011120.1	MRE	TATAAAA	cis-acting element involved in the abscisic acid responsiveness
Streb.3G011120.1	G-Box	TGATAATGT	MYB binding site involved in light responsiveness
Streb.3G011120.1	I-box	CCAAT	cis-acting regulatory element involved in light responsiveness
Streb.3G011120.1	CAAT-box	GTTGACGTGA	part of a light responsive element
Streb.3G011120.1	O2-site	GATGACATGG	cis-acting regulatory element involved in zein metabolism regulation
Streb.3G011120.1	O2-site	TACGTG	cis-acting regulatory element involved in zein metabolism regulation
Streb.3G011120.1	G-box	TACGTG	cis-acting regulatory element involved in zein metabolism regulation
Streb.3G011120.1	G-box	CACGTG	cis-acting regulatory element involved in light responsiveness
Streb.3G011120.1	G-box	CAACTG	cis-acting regulatory element involved in light responsiveness
Streb.3G011120.1	MBS	gGTACGTGGCG	cis-acting regulatory element involved in light responsiveness
Streb.3G011120.1	motif I	TGACG	MYB binding site involved in drought-inducibility
Streb.3G011120.1	TGACG-motif	TGACG	cis-acting regulatory element root specific
Streb.3G011120.1	TGACG-motif	TGACG	cis-acting regulatory element involved in the MeJA-responsiveness
Streb.3G011120.1	TGACG-motif	TGACG	cis-acting regulatory element involved in the MeJA-responsiveness
Streb.3G011120.1	TGACG-motif	GGTTAA	cis-acting regulatory element involved in the MeJA-responsiveness
Streb.3G011120.1	GT1-motif	GGTTAAT	cis-acting regulatory element involved in the MeJA-responsiveness
Streb.3G011120.1	GT1-motif	CGTCA	light responsive element
Streb.3G012510.1	CGTCA-motif	ATTAAT	light responsive element
Streb.3G012510.1	Box 4	ATTAAT	cis-acting regulatory element involved in the MeJA-responsiveness
Streb.3G012510.1	Box 4	ATTAAT	part of a conserved DNA module involved in light responsiveness
Streb.3G012510.1	Box 4	ATTAAT	part of a conserved DNA module involved in light responsiveness
Streb.3G012510.1	Box 4	AGAAACAA	part of a conserved DNA module involved in light responsiveness
Streb.3G012510.1	AE-box	tgacgTGTAAAGgtgaa	part of a conserved DNA module involved in light responsiveness
Streb.3G012510.1	Prolamin-box	motif_sequence	part of a module for light response
Streb.3G012510.1	ARE	CCATCTTTTT	involved in activation of zein gene endosperm development
Streb.3G012510.1	TCA-element	CAAAT	cis-acting regulatory element essential for the anaerobic induction
Streb.3G012510.1	CAAT-box	GCCACT	cis-acting element involved in salicylic acid responsiveness
Streb.3G012510.1	CAT-box	AATTATTTTTTATT	wound-responsive element
Streb.3G012510.1	AT1-motif	TATATA	cis-acting regulatory element related to meristem expression
Streb.3G012510.1	Box II	CAACGG	part of a light responsive module
Streb.3G012510.1	CCAAT-box	GGTTAA	part of a light responsive element
Streb.3G012510.1	GT1-motif	GGTTAA	MYBHv1 binding site
Streb.3G012510.1	GT1-motif	TCTCCCT	light responsive element
Streb.3G012510.1	TCCC-motif	TGACG	light responsive element
Streb.3G012510.1	TGACG-motif	CAACTG	part of a light responsive element
Streb.3G012510.1	MBS	CAACTG	cis-acting regulatory element involved in the MeJA-responsiveness
Streb.3G012510.1	MBS	CAACTG	MYB binding site involved in drought-inducibility
Streb.3G012510.1	MBS	CAACTG	MYB binding site involved in drought-inducibility
Streb.3G012510.1	MBS	ATAGATAA	MYB binding site involved in drought-inducibility
Streb.3G012510.1	GA-motif	TCAGAAGAGG	MYB binding site involved in drought-inducibility
Streb.3G020020.1	TCA-element	AAACCA	part of a light responsive element
Streb.3G020020.1	ARE	GATAGGA	cis-acting element involved in salicylic acid responsiveness
Streb.3G020020.1	GATA-motif	AAGATAAGATT	cis-acting regulatory element essential for the anaerobic induction
Streb.3G020020.1	GATA-motif	CTAACGTATT	part of a light responsive element
Streb.3G020020.1	ACE	TCTTAC	part of a light responsive element
Streb.3G020020.1	TCT-motif	ACGTG	cis-acting element involved in light responsiveness
Streb.3G020020.1	ABRE	motif_sequence	part of a light responsive element
Streb.3G020020.1	Box 4	ATTAAT	cis-acting element involved in the abscisic acid responsiveness
Streb.3G020020.1	Box 4	CCGAAA	part of a conserved DNA module involved in light responsiveness
Streb.3G020020.1	LTR	CGTCA	part of a conserved DNA module involved in light responsiveness
Streb.3G020020.1	CGTCA-motif	CGTCA	cis-acting element involved in low-temperature responsiveness
Streb.3G020020.1	CGTCA-motif	CGTCA	cis-acting regulatory element involved in the MeJA-responsiveness
Streb.3G020020.1	CGTCA-motif	CACGAC	cis-acting regulatory element involved in the MeJA-responsiveness
Streb.3G020020.1	G-box	CACGTC	cis-acting regulatory element involved in the MeJA-responsiveness
Streb.3G020020.1	G-box	TAACACGTAG	cis-acting regulatory element involved in light responsiveness
Streb.3G020020.1	G-box	CAACTG	cis-acting regulatory element involved in light responsiveness
Streb.3G020020.1	MBS	CAACTG	cis-acting regulatory element involved in light responsiveness
Streb.3G020020.1	MBS	CAACTG	MYB binding site involved in drought-inducibility
Streb.3G020020.1	MBS	TGACG	MYB binding site involved in drought-inducibility
Streb.3G020020.1	TGACG-motif	TGACG	MYB binding site involved in drought-inducibility
Streb.3G020020.1	TGACG-motif	TGACG	cis-acting regulatory element involved in the MeJA-responsiveness
Streb.3G020020.1	TGACG-motif	CAACGG	cis-acting regulatory element involved in the MeJA-responsiveness
Streb.3G020020.1	CCAAT-box	ATATAT	cis-acting regulatory element involved in the MeJA-responsiveness
Streb.3G020020.1	chs-CMA2a	CCAAT	MYBHv1 binding site
Streb.3G020020.1	CAAT-box	CAACTG	part of a light responsive element
Streb.3G020060.1	MBS	TACGTG	MYB binding site involved in drought-inducibility
Streb.3G020060.1	G-box	CACGTC	MYB binding site involved in drought-inducibility
Streb.3G020060.1	G-box	TAACACGTAG	cis-acting regulatory element involved in light responsiveness
Streb.3G020060.1	G-box	GGTTAA	cis-acting regulatory element involved in light responsiveness
Streb.3G020060.1	GT1-motif	GGTTAA	cis-acting regulatory element involved in light responsiveness
Streb.3G020060.1	GT1-motif	TGACG	light responsive element
Streb.3G020060.1	TGACG-motif	CCTTTTG	light responsive element
Streb.3G020060.1	P-box	TATA	cis-acting regulatory element involved in the MeJA-responsiveness
Streb.3G020060.1	CAAT-box	TCAGAAGAGG	gibberellin-responsive element
Streb.3G020060.1	TCA-element	AAACCA	part of a light responsive element
Streb.3G020060.1	ARE	AAACCA	cis-acting element involved in salicylic acid responsiveness
Streb.3G020060.1	ARE	AAACCA	cis-acting regulatory element essential for the anaerobic induction
Streb.3G020060.1	ARE	ATAGAAATCAA	cis-acting regulatory element essential for the anaerobic induction
Streb.3G020060.1	AT-rich element	ACGTG	cis-acting regulatory element essential for the anaerobic induction
Streb.3G020060.1	ABRE	ACGTG	binding site of AT-rich DNA binding protein (ATBP-1)
Streb.3G020060.1	ABRE	TCTTAC	cis-acting element involved in the abscisic acid responsiveness
Streb.3G020060.1	TCT-motif	AGAAACTT	cis-acting element involved in the abscisic acid responsiveness
Streb.3G020060.1	AE-box	motif_sequence	part of a light responsive element
Streb.3G020060.1	Sp1	ATTAAT	part of a module for light response
Streb.3G020060.1	Box 4	CGTCA	light responsive element
Streb.3G020060.1	CGTCA-motif	CCGAAA	part of a conserved DNA module involved in light responsiveness
Streb.3G020060.1	LTR	TACGTG	cis-acting regulatory element involved in the MeJA-responsiveness
Streb.3G021150.1	G-box	GTTGACGTGA	cis-acting element involved in low-temperature responsiveness
Streb.3G021150.1	O2-site	GGTTAA	cis-acting regulatory element involved in light responsiveness
Streb.3G021150.1	GT1-motif	GGTTAA	cis-acting regulatory element involved in zein metabolism regulation
Streb.3G021150.1	GT1-motif	GGTTAAT	light responsive element
Streb.3G021150.1	GT1-motif	GGTTAA	light responsive element
Streb.3G021150.1	GT1-motif	ccttatcct	light responsive element
Streb.3G021150.1	I-box	gGATAAGGTG	light responsive element
Streb.3G021150.1	I-box	AAGATAAGGCT	part of a light responsive element
Streb.3G021150.1	I-box	AGATAAGG	part of a light responsive element
Streb.3G021150.1	I-box	CACGTT	part of a light responsive element
Streb.3G021150.1	G-Box	CACGTT	part of a light responsive element
Streb.3G021150.1	G-Box	CAAAT	cis-acting regulatory element involved in light responsiveness
Streb.3G021150.1	CAAT-box	AAATTTCCT	cis-acting regulatory element involved in light responsiveness
Streb.3G021150.1	WUN-motif	AAACCA	cis-acting regulatory element related to meristem expression
Streb.3G021150.1	ARE	AAACCA	wound-responsive element
Streb.3G021150.1	ARE	AAACCA	cis-acting regulatory element essential for the anaerobic induction
Streb.3G021150.1	ARE	AAACCA	cis-acting regulatory element essential for the anaerobic induction
Streb.3G021150.1	ARE	ACGTG	cis-acting regulatory element essential for the anaerobic induction
Streb.3G021150.1	ABRE	ACGTG	cis-acting regulatory element essential for the anaerobic induction
Streb.3G021150.1	ABRE	ACGTG	cis-acting element involved in the abscisic acid responsiveness
Streb.3G021150.1	ABRE	AAGGATAAGG	cis-acting element involved in the abscisic acid responsiveness
Streb.3G021150.1	GATA-motif	AAGGATAAGG	cis-acting element involved in the abscisic acid responsiveness
Streb.3G021150.1	GATA-motif	TCTGTTG	part of a light responsive element
Streb.3G021150.1	GARE-motif	ATTAAT	part of a light responsive element
Streb.3G021150.1	Box 4	ATTAAT	gibberellin-responsive element
Streb.3G021150.1	Box 4	ATTAAT	part of a conserved DNA module involved in light responsiveness
Streb.3G021150.1	Box 4	GGATTTTACAGT	part of a conserved DNA module involved in light responsiveness
Streb.3G021150.1	LTR	TGACG	part of a conserved DNA module involved in light responsiveness
Streb.3G021180.1	TGACG-motif	GGTTAA	cis-acting element involved in low-temperature responsiveness
Streb.3G021180.1	GT1-motif	GGTTAA	cis-acting regulatory element involved in the MeJA-responsiveness
Streb.3G021180.1	GT1-motif	GATGA(C/T)(A/G)TG(A/G)	light responsive element
Streb.3G021180.1	O2-site	CACGTT	light responsive element
Streb.3G021180.1	G-Box	CACGTT	cis-acting regulatory element involved in zein metabolism regulation
Streb.3G021180.1	G-Box	AAGATAAGGCT	cis-acting regulatory element involved in light responsiveness
Streb.3G021180.1	I-box	AGATAAGG	cis-acting regulatory element involved in light responsiveness
Streb.3G021180.1	I-box	CAAAT	part of a light responsive element
Streb.3G021180.1	CAAT-box	TCTTAC	part of a light responsive element
Streb.3G021180.1	TCT-motif	ACGTG	part of a light responsive element
Streb.3G021180.1	ABRE	ACGTG	part of a light responsive element
Streb.3G021180.1	ABRE	TTACTTAA	cis-acting element involved in the abscisic acid responsiveness
Streb.3G021180.1	chs-CMA1a	AAACCA	cis-acting element involved in the abscisic acid responsiveness
Streb.3G021180.1	ARE	AAACCA	part of a light responsive element
Streb.3G021180.1	ARE	AAACCA	cis-acting regulatory element essential for the anaerobic induction
Streb.3G021180.1	ARE	AAACCA	cis-acting regulatory element essential for the anaerobic induction
Streb.3G021180.1	ARE	AAACCA	cis-acting regulatory element essential for the anaerobic induction
Streb.3G021180.1	ARE	CAATCAAAACCT	cis-acting regulatory element essential for the anaerobic induction
Streb.3G021180.1	AAAC-motif	CGTCA	cis-acting regulatory element essential for the anaerobic induction
Streb.3G021180.1	CGTCA-motif	ATTAAT	light responsive element
Streb.3G021180.1	Box 4	ATTAAT	cis-acting regulatory element involved in the MeJA-responsiveness
Streb.3G021180.1	Box 4	motif_sequence	part of a conserved DNA module involved in light responsiveness
Streb.3G021200.1	MRE	GGTTAA	part of a conserved DNA module involved in light responsiveness
Streb.3G021200.1	GT1-motif	GGTTAA	MYB binding site involved in light responsiveness
Streb.3G021200.1	GT1-motif	GGTTAA	light responsive element
Streb.3G021200.1	GT1-motif	TGACGTAA	light responsive element
Streb.3G021200.1	TGA-box	TGACG	light responsive element
Streb.3G021200.1	TGACG-motif	GATGA(C/T)(A/G)TG(A/G)	part of an auxin-responsive element
Streb.3G021200.1	O2-site	AACGAC	cis-acting regulatory element involved in the MeJA-responsiveness
Streb.3G021200.1	TGA-element	CCGAAA	cis-acting regulatory element involved in zein metabolism regulation
Streb.3G021200.1	LTR	CCGAAA	auxin-responsive element
Streb.3G021200.1	LTR	CAAT(A/T)ATTG	cis-acting element involved in low-temperature responsiveness
Streb.3G021200.1	HD-Zip 1	motif_sequence	cis-acting element involved in low-temperature responsiveness
Streb.3G021200.1	TCT-motif	CAATCAAAACCT	element involved in differentiation of the palisade mesophyll cells
Streb.3G021200.1	AAAC-motif	ccTATAAAaa	part of a light responsive element
Streb.3G021200.1	G-Box	AAGATAAGGCT	light responsive element
Streb.3G021200.1	I-box	AGATAAGG	cis-acting regulatory element involved in light responsiveness
Streb.3G021200.1	I-box	CCAAT	part of a light responsive element
Streb.3G021200.1	CAAT-box	CGTCA	part of a light responsive element
Streb.3G021200.1	CGTCA-motif	AGAAACAA	protein binding site
Streb.3G021200.1	AE-box	ATTAAT	cis-acting regulatory element involved in the MeJA-responsiveness
Streb.3G021200.1	Box 4	ATTAAT	part of a module for light response
Streb.3G021200.1	Box 4	ATTAAT	part of a conserved DNA module involved in light responsiveness
Streb.3G021200.1	Box 4	ATTAAT	part of a conserved DNA module involved in light responsiveness
Streb.3G021200.1	Box 4	ATTAAT	part of a conserved DNA module involved in light responsiveness
Streb.3G021200.1	Box 4	ATTAAT	part of a conserved DNA module involved in light responsiveness
Streb.3G021200.1	Box 4	ATTAAT	part of a conserved DNA module involved in light responsiveness
Streb.3G021200.1	Box 4	ACGTG	part of a conserved DNA module involved in light responsiveness
Streb.3G021200.1	ABRE	AAACCA	part of a conserved DNA module involved in light responsiveness
Streb.3G021200.1	ARE	AAACCA	cis-acting element involved in the abscisic acid responsiveness
Streb.3G021200.1	ARE	AAACCA	cis-acting regulatory element essential for the anaerobic induction
Streb.3G021200.1	ARE	AAACCA	cis-acting regulatory element essential for the anaerobic induction
Streb.3G021200.1	ARE	AAACCA	cis-acting regulatory element essential for the anaerobic induction
Streb.3G021200.1	ARE	AAACCA	cis-acting regulatory element essential for the anaerobic induction
Streb.3G021200.1	ARE	AAACCA	cis-acting regulatory element essential for the anaerobic induction
Streb.3G021200.1	ARE	AAACCA	cis-acting regulatory element essential for the anaerobic induction
Streb.3G021200.1	ARE	AAACCA	cis-acting regulatory element essential for the anaerobic induction
Streb.3G021200.1	ARE	AATCTAATCC	cis-acting regulatory element essential for the anaerobic induction
Streb.3G031640.1	ATCT-motif	AATCTAATCC	cis-acting regulatory element essential for the anaerobic induction
Streb.3G031640.1	ATCT-motif	cGATAAGGCG	part of a conserved DNA module involved in light responsiveness
Streb.3G031640.1	I-box	CACGTT	part of a conserved DNA module involved in light responsiveness
Streb.3G031640.1	G-Box	CAAAT	part of a light responsive element
Streb.3G031640.1	CAAT-box	CAACTG	cis-acting regulatory element involved in light responsiveness
Streb.3G031640.1	MBS	GGTTAA	cis-acting regulatory element involved in light responsiveness
Streb.3G031640.1	GT1-motif	TGACG	MYB binding site involved in drought-inducibility
Streb.3G031640.1	TGACG-motif	ATTAAT	light responsive element
Streb.3G031640.1	Box 4	ATTAAT	cis-acting regulatory element involved in the MeJA-responsiveness
Streb.3G031640.1	Box 4	ATTAAT	part of a conserved DNA module involved in light responsiveness
Streb.3G031640.1	Box 4	motif_sequence	part of a conserved DNA module involved in light responsiveness
Streb.3G031640.1	CGTCA-motif	CCGAAA	part of a conserved DNA module involved in light responsiveness
Streb.3G031640.1	LTR	ACGTG	cis-acting regulatory element involved in the MeJA-responsiveness
Streb.3G031640.1	ABRE	AACCCGG	cis-acting element involved in low-temperature responsiveness
Streb.3G031640.1	ABRE	ACGTG	cis-acting element involved in the abscisic acid responsiveness
Streb.3G031640.1	ABRE	TCTTAC	cis-acting element involved in the abscisic acid responsiveness
Streb.3G031640.1	TCT-motif	TCTTAC	cis-acting element involved in the abscisic acid responsiveness
Streb.3G031640.1	TCT-motif	TCTTAC	part of a light responsive element
Streb.3G031640.1	TCT-motif	TCTGTTG	part of a light responsive element
Streb.3G031640.1	GARE-motif	GACACGTATG	part of a light responsive element
Streb.3G031640.1	ACE	motif_sequence	gibberellin-responsive element
Streb.4G010130.1	ACE	CCATCTTTTT	cis-acting element involved in light responsiveness
Streb.4G010130.1	TCA-element	CCATCTTTTT	cis-acting element involved in light responsiveness
Streb.4G010130.1	TCA-element	CCATCTTTTT	cis-acting element involved in salicylic acid responsiveness
Streb.4G010130.1	TCA-element	TGAGTCA	cis-acting element involved in salicylic acid responsiveness
Streb.4G010130.1	GCN4_motif	AACCTAA	cis-acting element involved in salicylic acid responsiveness
Streb.4G010130.1	MRE	GGTTAA	cis-regulatory element involved in endosperm expression
Streb.4G010130.1	GT1-motif	GGTTAA	MYB binding site involved in light responsiveness
Streb.4G010130.1	GT1-motif	TGACG	light responsive element
Streb.4G010130.1	TGACG-motif	TGACG	light responsive element
Streb.4G010130.1	TGACG-motif	TGACG	cis-acting regulatory element involved in the MeJA-responsiveness
Streb.4G010130.1	TGACG-motif	ATTCTCTAAC	cis-acting regulatory element involved in the MeJA-responsiveness
Streb.4G010130.1	TC-rich repeats	CGTCA	cis-acting regulatory element involved in the MeJA-responsiveness
Streb.4G010130.1	CGTCA-motif	CGTCA	cis-acting element involved in defense and stress responsiveness
Streb.4G010130.1	CGTCA-motif	CGTCA	cis-acting regulatory element involved in the MeJA-responsiveness
Streb.4G010130.1	CGTCA-motif	GGGCGG	cis-acting regulatory element involved in the MeJA-responsiveness
Streb.4G010130.1	Sp1	GGGCGG	cis-acting regulatory element involved in the MeJA-responsiveness
Streb.4G010130.1	Sp1	AAGGATAAGG	light responsive element
Streb.4G010130.1	GATA-motif	ACGTG	light responsive element
Streb.4G010130.1	ABRE	ACGTG	part of a light responsive element
Streb.4G010130.1	ABRE	ACGTG	cis-acting element involved in the abscisic acid responsiveness
Streb.4G010130.1	ABRE	GACACGTGGC	cis-acting element involved in the abscisic acid responsiveness
Streb.4G010130.1	ABRE	CACGTG	cis-acting element involved in the abscisic acid responsiveness
Streb.4G010130.1	ABRE	ACGTG	cis-acting element involved in the abscisic acid responsiveness
Streb.4G010130.1	ABRE	AAACCA	cis-acting element involved in the abscisic acid responsiveness
Streb.4G010130.1	ARE	TATA	cis-acting element involved in the abscisic acid responsiveness
Streb.4G010130.1	I-box	CACGTT	cis-acting regulatory element essential for the anaerobic induction
Streb.4G010130.1	G-Box	CACGTT	part of a light responsive element
Streb.4G010130.1	G-Box	CACGTG	cis-acting regulatory element involved in light responsiveness
Streb.4G010130.1	G-Box	CCAAT	cis-acting regulatory element involved in light responsiveness
Streb.4G010130.1	CAAT-box	TAAACGTG	cis-acting regulatory element involved in light responsiveness
Streb.4G010130.1	G-box	TACGTG	gibberellin-responsive element
Streb.4G010130.1	G-box	GCCACGTGGA	cis-acting regulatory element involved in light responsiveness
Streb.4G010130.1	G-box	ACACGTG(G/t)CACC	cis-acting regulatory element involved in light responsiveness
Streb.4G010130.1	G-box	CACGTG	cis-acting regulatory element involved in light responsiveness
Streb.4G010130.1	G-box	CAACTG	cis-acting regulatory element involved in light responsiveness
Streb.4G010130.1	MBS	CAACTG	cis-acting regulatory element involved in light responsiveness
Streb.4G010130.1	MBS	CAACTG	MYB binding site involved in drought-inducibility
Streb.4G010130.1	MBS	TAAAATACT	MYB binding site involved in drought-inducibility
Streb.4G010840.1	AT-rich sequence	TATACA	MYB binding site involved in drought-inducibility
Streb.4G010840.1	chs-CMA2a	CCAAT	element for maximal elicitor-mediated activation (2copies)
Streb.4G010840.1	CAAT-box	CGTCA	part of a light responsive element
Streb.4G011920.1	CGTCA-motif	AATCACAACCATA	cis-acting regulatory element involved in the MeJA-responsiveness
Streb.4G011920.1	ACA-motif	ATTAAT	cis-acting regulatory element involved in the MeJA-responsiveness
Streb.4G011920.1	Box 4	ATTAAT	part of gapA in (gapA-CMA1) involved with light responsiveness
Streb.4G011920.1	Box 4	AGAAACAA	part of a conserved DNA module involved in light responsiveness
Streb.4G011920.1	AE-box	AGAAACAA	part of a conserved DNA module involved in light responsiveness
Streb.4G011920.1	AE-box	AGAAACAA	part of a module for light response
Streb.4G011920.1	AE-box	motif_sequence	part of a module for light response
Streb.4G011920.1	ABRE	ACGTG	part of a module for light response
Streb.4G011920.1	ABRE	TCTTAC	cis-acting element involved in the abscisic acid responsiveness
Streb.4G011920.1	TCT-motif	TCTTAC	cis-acting element involved in the abscisic acid responsiveness
Streb.4G011920.1	TCT-motif	AAACCA	part of a light responsive element
Streb.4G011920.1	ARE	AAACCA	part of a light responsive element
Streb.4G011920.1	ARE	AAACCA	cis-acting regulatory element essential for the anaerobic induction
Streb.4G011920.1	ARE	CCATCTTTTT	cis-acting regulatory element essential for the anaerobic induction
Streb.4G011920.1	TCA-element	CCATCTTTTT	cis-acting regulatory element essential for the anaerobic induction
Streb.4G011920.1	TCA-element	TGATAATGT	cis-acting element involved in salicylic acid responsiveness
Streb.4G011920.1	I-box	CAAAT	cis-acting element involved in salicylic acid responsiveness
Streb.4G011920.1	CAAT-box	TAAAATACT	part of a light responsive element
Streb.4G011920.1	AT-rich sequence	GGTTAA	MYB binding site involved in light responsiveness
Streb.4G011920.1	GT1-motif	GGTTAA	element for maximal elicitor-mediated activation (2copies)
Streb.4G011920.1	GT1-motif	TCTCCCT	light responsive element
Streb.4G011920.1	TCCC-motif	TGACG	light responsive element
Streb.4G011920.1	TGACG-motif	TGACG	part of a light responsive element
Streb.4G011920.1	TGACG-motif	CACGTC	cis-acting regulatory element involved in the MeJA-responsiveness
Streb.4G011920.1	G-box	CACGTC	cis-acting regulatory element involved in the MeJA-responsiveness
Streb.4G011920.1	G-box	GTAAT(G/C)ATTAC	cis-acting regulatory element involved in light responsiveness
Streb.4G016370.1	HD-Zip 3	motif_sequence	cis-acting regulatory element involved in light responsiveness
Streb.4G016370.1	ATC-motif	ATTAAT	protein binding site
Streb.4G016370.1	Box 4	ATTAAT	part of a conserved DNA module involved in light responsiveness
Streb.4G016370.1	Box 4	ATTAAT	part of a conserved DNA module involved in light responsiveness
Streb.4G016370.1	Box 4	ACGTG	part of a conserved DNA module involved in light responsiveness
Streb.4G016370.1	ABRE	ACGTG	part of a conserved DNA module involved in light responsiveness
Streb.4G016370.1	ABRE	CACGTG	cis-acting element involved in the abscisic acid responsiveness
Streb.4G016370.1	ABRE	ACGTG	cis-acting element involved in the abscisic acid responsiveness
Streb.4G016370.1	ABRE	TGAGTCA	cis-acting element involved in the abscisic acid responsiveness
Streb.4G016370.1	GCN4_motif	AAACCA	cis-acting element involved in the abscisic acid responsiveness
Streb.4G016370.1	ARE	ATAGAAATCAA	cis-regulatory element involved in endosperm expression
Streb.4G016370.1	AT-rich element	AAATTTCCT	cis-acting regulatory element essential for the anaerobic induction
Streb.4G016370.1	WUN-motif	GCCACT	binding site of AT-rich DNA binding protein (ATBP-1)
Streb.4G016370.1	CAT-box	GCCACT	wound-responsive element
Streb.4G016370.1	CAT-box	TATA	cis-acting regulatory element related to meristem expression
Streb.4G016370.1	CAAT-box	AACCTAA	cis-acting regulatory element related to meristem expression
Streb.4G016370.1	MRE	GGTTAAT	cis-acting regulatory element involved in light responsiveness
Streb.4G016370.1	GT1-motif	GGTTAA	MYB binding site involved in light responsiveness
Streb.4G016370.1	GT1-motif	TCTCCCT	light responsive element
Streb.4G016370.1	TCCC-motif	TACGTG	light responsive element
Streb.4G016370.1	G-box	TACGTG	part of a light responsive element
Streb.4G016370.1	G-box	CACGTG	cis-acting regulatory element involved in light responsiveness
Streb.4G016370.1	G-box	TAAAATACT	cis-acting regulatory element involved in light responsiveness
Streb.4G018140.1	AT-rich sequence	CACGAC	cis-acting regulatory element involved in light responsiveness
Streb.4G018140.1	G-box	CCACGTAA	element for maximal elicitor-mediated activation (2copies)
Streb.4G018140.1	G-box	TACGTG	cis-acting regulatory element involved in light responsiveness
Streb.4G018140.1	G-box	CACGTC	cis-acting regulatory element involved in light responsiveness
Streb.4G018140.1	G-box	CACGAC	cis-acting regulatory element involved in light responsiveness
Streb.4G018140.1	G-box	CACGAC	cis-acting regulatory element involved in light responsiveness
Streb.4G018140.1	G-box	GGTCCAT	cis-acting regulatory element involved in light responsiveness
Streb.4G018140.1	AuxRR-core	TACCGACAT	cis-acting regulatory element involved in light responsiveness
Streb.4G018140.1	DRE	AAACCA	cis-acting regulatory element involved in auxin responsiveness
Streb.4G018680.1	ARE	AAACCA	cis-acting element involved in dehydration, low-temp, salt stresses Streb.4G018140.1 TATA-box TATA 74 4 + Arabidopsis thaliana core promoter element around -30 of transcription start Streb.4G018140.1 TATA-box TATATA 148 6 + Arabidopsis thaliana core promoter element around -30 of transcription start Streb.4G018140.1 TATA-box ATATAT 149 6 + Brassica napus core promoter element around -30 of transc…
Streb.4G018680.1	ARE	AAACCA	cis-acting regulatory element essential for the anaerobic induction
Streb.4G018680.1	ARE	AAACCA	cis-acting regulatory element essential for the anaerobic induction
Streb.4G018680.1	ARE	ACGTG	cis-acting regulatory element essential for the anaerobic induction
Streb.4G018680.1	ABRE	ACGTG	cis-acting regulatory element essential for the anaerobic induction
Streb.4G018680.1	ABRE	TCTTAC	cis-acting element involved in the abscisic acid responsiveness
Streb.4G018680.1	TCT-motif	TCTTAC	cis-acting element involved in the abscisic acid responsiveness
Streb.4G018680.1	TCT-motif	TCTGTTG	part of a light responsive element
Streb.4G018680.1	GARE-motif	ATTAAT	part of a light responsive element
Streb.4G018680.1	Box 4	ATTAAT	gibberellin-responsive element
Streb.4G018680.1	Box 4	CACTATCTAAC	part of a conserved DNA module involved in light responsiveness
Streb.4G018680.1	3-AF3 binding site	motif_sequence	part of a conserved DNA module involved in light responsiveness
Streb.4G018680.1	LTR	CCGAAA	part of a conserved DNA module array (CMA3)
Streb.4G018680.1	LTR	CACGTG	cis-acting element involved in low-temperature responsiveness
Streb.4G020480.1	G-box	CACGTG	cis-acting element involved in low-temperature responsiveness
Streb.4G020480.1	G-box	CACGTC	cis-acting regulatory element involved in light responsiveness
Streb.4G020480.1	G-box	CAACTG	cis-acting regulatory element involved in light responsiveness
Streb.4G020480.1	MBS	CATCGTGTGGC	cis-acting regulatory element involved in light responsiveness
Streb.4G020480.1	GTGGC-motif	TATA	MYB binding site involved in drought-inducibility
Streb.4G020480.1	G-Box	CACGTG	part of a light responsive element
Streb.4G020480.1	G-Box	CACGTT	cis-acting regulatory element involved in light responsiveness
Streb.4G020480.1	G-Box	CACGTT	cis-acting regulatory element involved in light responsiveness
Streb.4G020480.1	G-Box	CAAAT	cis-acting regulatory element involved in light responsiveness
Streb.4G020480.1	CAAT-box	AAACCA	cis-acting regulatory element involved in light responsiveness
Streb.4G020480.1	ARE	GATAGGG	cis-acting regulatory element essential for the anaerobic induction
Streb.4G020480.1	GATA-motif	TCTGTTG	cis-acting regulatory element essential for the anaerobic induction
Streb.4G020480.1	GARE-motif	CACGTG	part of a light responsive element
Streb.4G020480.1	ABRE	ACGTG	gibberellin-responsive element
Streb.4G020480.1	ABRE	CACGTG	cis-acting element involved in the abscisic acid responsiveness
Streb.4G020480.1	ABRE	ACGTG	cis-acting element involved in the abscisic acid responsiveness
Streb.4G020480.1	ABRE	ACGTG	cis-acting element involved in the abscisic acid responsiveness
Streb.4G020480.1	ABRE	ACGTG	cis-acting element involved in the abscisic acid responsiveness
Streb.4G020480.1	ABRE	ACGTG	cis-acting element involved in the abscisic acid responsiveness
Streb.4G020480.1	ABRE	ATTAAT	cis-acting element involved in the abscisic acid responsiveness
Streb.4G020480.1	Box 4	ATTAAT	cis-acting element involved in the abscisic acid responsiveness
Streb.4G020480.1	Box 4	ATTAAT	part of a conserved DNA module involved in light responsiveness
Streb.4G020480.1	Box 4	ATTAAT	part of a conserved DNA module involved in light responsiveness
Streb.4G020480.1	Box 4	ATTAAT	part of a conserved DNA module involved in light responsiveness
Streb.4G020480.1	Box 4	CGTCA	part of a conserved DNA module involved in light responsiveness
Streb.4G020480.1	CGTCA-motif	CGTCA	part of a conserved DNA module involved in light responsiveness
Streb.4G020480.1	CGTCA-motif	CGTCA	cis-acting regulatory element involved in the MeJA-responsiveness
Streb.4G020480.1	CGTCA-motif	CGTCA	cis-acting regulatory element involved in the MeJA-responsiveness
Streb.4G020480.1	CGTCA-motif	GATGATGTGG	cis-acting regulatory element involved in the MeJA-responsiveness
Streb.4G020480.1	O2-site	ATTCTCTAAC	cis-acting regulatory element involved in the MeJA-responsiveness
Streb.4G020480.1	TC-rich repeats	ATTCTCTAAC	cis-acting regulatory element involved in zein metabolism regulation
Streb.4G020480.1	TC-rich repeats	TGACG	cis-acting element involved in defense and stress responsiveness
Streb.4G020480.1	TGACG-motif	TGACG	cis-acting element involved in defense and stress responsiveness
Streb.4G020480.1	TGACG-motif	TGACG	cis-acting regulatory element involved in the MeJA-responsiveness
Streb.4G020480.1	TGACG-motif	TGACG	cis-acting regulatory element involved in the MeJA-responsiveness
Streb.4G020480.1	TGACG-motif	GGTTAAT	cis-acting regulatory element involved in the MeJA-responsiveness
Streb.4G020480.1	GT1-motif	GGTTAA	cis-acting regulatory element involved in the MeJA-responsiveness
Streb.4G020480.1	GT1-motif	AACCTAA	light responsive element
Streb.4G020480.1	MRE	CCGTCC	light responsive element
Streb.4G020480.1	A-box	CCGTCC	MYB binding site involved in light responsiveness
Streb.4G020480.1	A-box	GCCACT	cis-acting regulatory element
Streb.4G020480.1	CAT-box	CAATCAAAACCT	cis-acting regulatory element
Streb.4G020480.1	AAAC-motif	TCTTAC	cis-acting regulatory element related to meristem expression
Streb.4G020480.1	TCT-motif	motif_sequence	light responsive element
Streb.4G020480.1	LTR	AACGAC	part of a light responsive element
Streb.4G020480.1	TGA-element	ACGTG	cis-acting element involved in low-temperature responsiveness
Streb.4G021440.1	ABRE	ACGTG	auxin-responsive element
Streb.4G021440.1	ABRE	AAGGATAAGG	cis-acting element involved in the abscisic acid responsiveness
Streb.4G021440.1	GATA-motif	TCTGTTG	cis-acting element involved in the abscisic acid responsiveness
Streb.4G021440.1	GARE-motif	GAATTTAATTAA	part of a light responsive element
Streb.4G021440.1	AT-rich element	AAACCA	gibberellin-responsive element
Streb.4G021440.1	ARE	AAACCA	binding site of AT-rich DNA binding protein (ATBP-1)
Streb.4G021440.1	ARE	AAACCA	cis-acting regulatory element essential for the anaerobic induction
Streb.4G021440.1	ARE	CCATCTTTTT	cis-acting regulatory element essential for the anaerobic induction
Streb.4G021440.1	TCA-element	CCATCTTTTT	cis-acting regulatory element essential for the anaerobic induction
Streb.4G021440.1	TCA-element	AACGAC	cis-acting element involved in salicylic acid responsiveness
Streb.4G021440.1	TGA-element	CGTCA	cis-acting element involved in salicylic acid responsiveness
Streb.4G021440.1	CGTCA-motif	ATTAAT	auxin-responsive element
Streb.4G021440.1	Box 4	ATTAAT	cis-acting regulatory element involved in the MeJA-responsiveness
Streb.4G021440.1	Box 4	motif_sequence	part of a conserved DNA module involved in light responsiveness
Streb.4G021440.1	CCAAT-box	GGTTAA	part of a conserved DNA module involved in light responsiveness
Streb.4G021440.1	GT1-motif	GGTTAAT	MYBHv1 binding site
Streb.4G021440.1	GT1-motif	GGTTAA	light responsive element
Streb.4G021440.1	GT1-motif	CAGATTTATTTTTA	light responsive element
Streb.4G021440.1	LS7	TGACG	light responsive element
Streb.4G021440.1	TGACG-motif	ATTCTCTAAC	part of a light responsive element
Streb.4G021440.1	TC-rich repeats	TACGTG	cis-acting regulatory element involved in the MeJA-responsiveness
Streb.4G021440.1	G-box	GATGATGTGG	cis-acting element involved in defense and stress responsiveness
Streb.4G021440.1	O2-site	GTTGACGTGA	cis-acting regulatory element involved in light responsiveness
Streb.4G021440.1	O2-site	CAACTG	cis-acting regulatory element involved in zein metabolism regulation
Streb.4G021440.1	MBS	CAACTG	cis-acting regulatory element involved in zein metabolism regulation
Streb.4G021440.1	MBS	CAACTG	MYB binding site involved in drought-inducibility
Streb.4G021440.1	MBS	CACGTT	MYB binding site involved in drought-inducibility
Streb.4G021440.1	G-Box	CAAAT	MYB binding site involved in drought-inducibility
Streb.4G021440.1	CAAT-box	GGTCCAT	cis-acting regulatory element involved in light responsiveness
Streb.5G004740.1	AuxRR-core	CAACTG	cis-acting regulatory element related to meristem expression
Streb.5G004740.1	MBS	CACGAC	cis-acting regulatory element involved in auxin responsiveness
Streb.5G004740.1	G-box	TACGTG	MYB binding site involved in drought-inducibility
Streb.5G004740.1	G-box	GATGATGTGG	cis-acting regulatory element involved in light responsiveness
Streb.5G004740.1	O2-site	TGACG	cis-acting regulatory element involved in light responsiveness
Streb.5G004740.1	TGACG-motif	CCTTTTG	cis-acting regulatory element involved in zein metabolism regulation
Streb.5G004740.1	P-box	AACCTAA	cis-acting regulatory element involved in the MeJA-responsiveness
Streb.5G004740.1	MRE	TATACA	gibberellin-responsive element
Streb.5G004740.1	CAAT-box	CAAATGAA(A/G)A	MYB binding site involved in light responsiveness
Streb.5G004740.1	Gap-box	AAACCA	part of a light responsive element
Streb.5G004740.1	ARE	CTAACGTATT	part of a light responsive element
Streb.5G004740.1	ACE	ACGTG	cis-acting regulatory element essential for the anaerobic induction
Streb.5G004740.1	ABRE	TCTTAC	cis-acting element involved in light responsiveness
Streb.5G004740.1	TCT-motif	motif_sequence	cis-acting element involved in the abscisic acid responsiveness
Streb.5G004740.1	Box 4	ATTAAT	part of a light responsive element
Streb.5G004740.1	Box 4	CGTCA	part of a conserved DNA module involved in light responsiveness
Streb.5G004740.1	CGTCA-motif	AACGAC	part of a conserved DNA module involved in light responsiveness
Streb.5G004740.1	TGA-element	CAAAGATATC	cis-acting regulatory element involved in the MeJA-responsiveness
Streb.5G004740.1	circadian	(T/C)C(T/C)AACGG(T/C)(T/C)A	auxin-responsive element
Streb.5G015740.1	MSA-like	CGTCA	cis-acting regulatory element involved in circadian control
Streb.5G015740.1	CGTCA-motif	AGAAACAA	cis-acting element involved in cell cycle regulation
Streb.5G015740.1	AE-box	ATTAAT	cis-acting regulatory element involved in the MeJA-responsiveness
Streb.5G015740.1	Box 4	ATTAAT	part of a module for light response
Streb.5G015740.1	Box 4	ATTAAT	part of a conserved DNA module involved in light responsiveness
Streb.5G015740.1	Box 4	ATTAAT	part of a conserved DNA module involved in light responsiveness
Streb.5G015740.1	Box 4	GATAGGA	part of a conserved DNA module involved in light responsiveness
Streb.5G015740.1	GATA-motif	AAGGATAAGG	part of a conserved DNA module involved in light responsiveness
Streb.5G015740.1	GATA-motif	ACGTG	part of a light responsive element
Streb.5G015740.1	ABRE	ACGTG	part of a light responsive element
Streb.5G015740.1	ABRE	AAACCA	cis-acting element involved in the abscisic acid responsiveness
Streb.5G015740.1	ARE	AAACCA	cis-acting element involved in the abscisic acid responsiveness
Streb.5G015740.1	ARE	AAACCA	cis-acting regulatory element essential for the anaerobic induction
Streb.5G015740.1	ARE	TATAAAT	cis-acting regulatory element essential for the anaerobic induction
Streb.5G015740.1	CAAT-box	TACGTG	cis-acting regulatory element essential for the anaerobic induction
Streb.5G015740.1	G-box	CCGAAA	cis-acting regulatory element involved in light responsiveness
Streb.5G015740.1	LTR	CCGAAA	cis-acting regulatory element involved in light responsiveness
Streb.5G015740.1	LTR	AACGAC	cis-acting element involved in low-temperature responsiveness
Streb.5G015740.1	TGA-element	motif_sequence	cis-acting element involved in low-temperature responsiveness
Streb.5G015740.1	TCA-element	CCATCTTTTT	auxin-responsive element
Streb.5G015740.1	TCA-element	TGAGTCA	cis-acting element involved in salicylic acid responsiveness
Streb.5G015740.1	GCN4_motif	GCCACT	cis-acting element involved in salicylic acid responsiveness
Streb.5G015740.1	CAT-box	AATCTAATCC	cis-regulatory element involved in endosperm expression
Streb.5G015740.1	ATCT-motif	CCGTCC	cis-acting regulatory element related to meristem expression
Streb.5G015740.1	A-box	TGACG	part of a conserved DNA module involved in light responsiveness
Streb.5G015740.1	TGACG-motif	GGTTAA	cis-acting regulatory element
Streb.5G015740.1	GT1-motif	GGTTAA	cis-acting regulatory element involved in the MeJA-responsiveness
Streb.5G015740.1	GT1-motif	GGTTAA	light responsive element
Streb.5G015740.1	GT1-motif	GGTTAA	light responsive element
Streb.5G015740.1	GT1-motif	GATGATGTGG	light responsive element
Streb.5G015740.1	O2-site	ATTCTCTAAC	light responsive element
Streb.5G015740.1	TC-rich repeats	GGTCCAT	cis-acting regulatory element involved in zein metabolism regulation
Streb.5G023990.1	AuxRR-core	TAACACGTAG	cis-acting element involved in defense and stress responsiveness
Streb.5G023990.1	G-box	TACGTG	cis-acting regulatory element involved in auxin responsiveness
Streb.5G023990.1	G-box	TAACACGTAG	cis-acting regulatory element involved in light responsiveness
Streb.5G023990.1	G-box	CACGTG	cis-acting regulatory element involved in light responsiveness
Streb.5G023990.1	G-box	atCATTTTCACt	cis-acting regulatory element involved in light responsiveness
Streb.5G023990.1	Box III	TATAAA	cis-acting regulatory element involved in light responsiveness
Streb.5G023990.1	CAAT-box	AAACCA	protein binding site
Streb.5G023990.1	ARE	CGTACGTGCA	cis-acting regulatory element involved in light responsiveness
Streb.5G023990.1	ABRE	ACGTG	cis-acting regulatory element essential for the anaerobic induction
Streb.5G023990.1	ABRE	CACGTG	cis-acting element involved in the abscisic acid responsiveness
Streb.5G023990.1	ABRE	ACGTG	cis-acting element involved in the abscisic acid responsiveness
Streb.5G023990.1	ABRE	ATTAAT	cis-acting element involved in the abscisic acid responsiveness
Streb.5G023990.1	Box 4	CAAAGATATC	cis-acting element involved in the abscisic acid responsiveness
Streb.5G023990.1	circadian	GATGATGTGG	part of a conserved DNA module involved in light responsiveness
Streb.5G023990.1	O2-site	ATTCTCTAAC	cis-acting regulatory element involved in circadian control
Streb.5G023990.1	TC-rich repeats	GGTTAA	cis-acting regulatory element involved in zein metabolism regulation
Streb.5G023990.1	GT1-motif	GGTTAA	cis-acting element involved in defense and stress responsiveness
Streb.5G023990.1	GT1-motif	GCCACT	light responsive element
Streb.5G023990.1	CAT-box	TTACTTAA	light responsive element
Streb.5G023990.1	chs-CMA1a	TCTTAC	cis-acting regulatory element related to meristem expression
Streb.5G023990.1	TCT-motif	TCTTAC	part of a light responsive element
Streb.5G023990.1	TCT-motif	TCTTAC	part of a light responsive element
Streb.5G023990.1	TCT-motif	TCTTAC	part of a light responsive element
Streb.5G023990.1	TCT-motif	motif_sequence	part of a light responsive element
Streb.5G023990.1	LTR	CCAAT	part of a light responsive element
Streb.5G027580.1	CAAT-box	taTATAAAtc	cis-acting element involved in low-temperature responsiveness
Streb.5G027580.1	GT1-motif	TGACG	cis-acting regulatory element involved in light responsiveness
Streb.5G027580.1	TGACG-motif	TGACG	light responsive element
Streb.5G027580.1	TGACG-motif	GTTTTCTTAC	cis-acting regulatory element involved in the MeJA-responsiveness
Streb.5G027580.1	TC-rich repeats	GTTTTCTTAC	cis-acting regulatory element involved in the MeJA-responsiveness
Streb.5G027580.1	TC-rich repeats	GGTCCAT	cis-acting element involved in defense and stress responsiveness
Streb.5G027580.1	AuxRR-core	CACGAC	cis-acting element involved in defense and stress responsiveness
Streb.5G027580.1	G-box	CGTCA	cis-acting regulatory element involved in auxin responsiveness
Streb.5G027580.1	CGTCA-motif	CGTCA	cis-acting regulatory element involved in light responsiveness
Streb.5G027580.1	CGTCA-motif	AACGAC	cis-acting regulatory element involved in the MeJA-responsiveness
Streb.5G027580.1	TGA-element	TCCGTGTACCA	cis-acting regulatory element involved in the MeJA-responsiveness
Streb.5G027580.1	Box II -like sequence	ATTAAT	auxin-responsive element
Streb.5G027580.1	Box 4	ATTAAT	cis-acting regulatory element
Streb.5G027580.1	Box 4	CAAT(A/T)ATTG	part of a conserved DNA module involved in light responsiveness
Streb.5G027580.1	HD-Zip 1	AGAAACAA	part of a conserved DNA module involved in light responsiveness
Streb.5G027580.1	AE-box	motif_sequence	element involved in differentiation of the palisade mesophyll cells
Streb.5G027580.1	Sp1	ACGTG	part of a module for light response
Streb.5G027580.1	ABRE	CTAACGTATT	light responsive element
Streb.5G027580.1	ACE	TGAGTCA	cis-acting element involved in the abscisic acid responsiveness
Streb.5G027580.1	GCN4_motif	AAACCA	cis-acting element involved in light responsiveness
Streb.5G027580.1	ARE	AAACCA	cis-regulatory element involved in endosperm expression
Streb.5G027580.1	ARE	AAACCA	cis-acting regulatory element essential for the anaerobic induction
Streb.5G027580.1	ARE	ATAGAAATCAA	cis-acting regulatory element essential for the anaerobic induction
Streb.5G027580.1	AT-rich element	CCATCTTTTT	cis-acting regulatory element essential for the anaerobic induction
Streb.5G027580.1	TCA-element	GGTTAA	binding site of AT-rich DNA binding protein (ATBP-1)
Streb.6G000950.1	GT1-motif	GGTTAAT	cis-acting element involved in salicylic acid responsiveness
Streb.6G000950.1	GT1-motif	GGTTAA	light responsive element
Streb.6G000950.1	GT1-motif	CACGAC	light responsive element
Streb.6G000950.1	G-box	ATATAA	light responsive element
Streb.6G000950.1	CAAT-box	GAATTTAATTAA	cis-acting regulatory element involved in light responsiveness
Streb.6G000950.1	ABRE	CAATCAAAACCT	part of a light responsive element
Streb.6G000950.1	AAAC-motif	TGAGTCA	cis-acting element involved in the abscisic acid responsiveness
Streb.6G000950.1	GCN4_motif	TGAGTCA	light responsive element
Streb.6G000950.1	GCN4_motif	AAACCA	cis-regulatory element involved in endosperm expression
Streb.6G000950.1	ARE	motif_sequence	cis-regulatory element involved in endosperm expression
Streb.6G000950.1	Box 4	ATTAAT	cis-acting regulatory element essential for the anaerobic induction
Streb.6G000950.1	Box 4	TCCGTGTACCA	part of a conserved DNA module involved in light responsiveness
Streb.6G000950.1	Box II -like sequence	TCTTAC	part of a conserved DNA module involved in light responsiveness
Streb.6G001650.1	TCT-motif	TCTTAC	cis-acting regulatory element
Streb.6G001650.1	TCT-motif	ACGTG	part of a light responsive element
Streb.6G001650.1	ABRE	CACGTG	part of a light responsive element
Streb.6G001650.1	ABRE	ACGTG	cis-acting element involved in the abscisic acid responsiveness
Streb.6G001650.1	ABRE	AAACCA	cis-acting element involved in the abscisic acid responsiveness
Streb.6G001650.1	ARE	CGTCA	cis-acting element involved in the abscisic acid responsiveness
Streb.6G001650.1	CGTCA-motif	CCGAAA	cis-acting regulatory element essential for the anaerobic induction
Streb.6G001650.1	LTR	CCGAAA	cis-acting regulatory element involved in the MeJA-responsiveness
Streb.6G001650.1	LTR	CCGAAA	cis-acting element involved in low-temperature responsiveness
Streb.6G001650.1	LTR	ATTAAT	cis-acting element involved in low-temperature responsiveness
Streb.6G001650.1	Box 4	ATTAAT	cis-acting element involved in low-temperature responsiveness
Streb.6G001650.1	Box 4	ATTAAT	part of a conserved DNA module involved in light responsiveness
Streb.6G001650.1	Box 4	ATTAAT	part of a conserved DNA module involved in light responsiveness
Streb.6G001650.1	Box 4	AGAAACAA	part of a conserved DNA module involved in light responsiveness
Streb.6G001650.1	AE-box	AGAAACTT	part of a conserved DNA module involved in light responsiveness
Streb.6G001650.1	AE-box	motif_sequence	part of a module for light response
Streb.6G001650.1	TGACG-motif	ATTCTCTAAC	part of a module for light response
Streb.6G001650.1	TC-rich repeats	GTTTTCTTAC	cis-acting regulatory element involved in the MeJA-responsiveness
Streb.6G001650.1	TC-rich repeats	CAACTG	cis-acting element involved in defense and stress responsiveness
Streb.6G001650.1	MBS	CAACTG	cis-acting element involved in defense and stress responsiveness
Streb.6G001650.1	MBS	GCCACGTGGA	MYB binding site involved in drought-inducibility
Streb.6G001650.1	G-box	CACGTG	MYB binding site involved in drought-inducibility
Streb.6G001650.1	G-box	GATGATGTGG	cis-acting regulatory element involved in light responsiveness
Streb.6G001650.1	O2-site	CAAAT	cis-acting regulatory element involved in light responsiveness
Streb.6G001650.1	CAAT-box	CACGTG	cis-acting regulatory element involved in zein metabolism regulation
Streb.6G001650.1	G-Box	TAAAGATT	cis-acting regulatory element involved in light responsiveness
Streb.6G001650.1	MRE	CAATCAAAACCT	cis-acting regulatory element involved in light responsiveness
Streb.6G004770.1	AAAC-motif	CCATCTTTTT	MYB binding site involved in light responsiveness
Streb.6G004770.1	TCA-element	TTACTTAA	light responsive element
Streb.6G004770.1	chs-CMA1a	TCTTAC	cis-acting element involved in salicylic acid responsiveness
Streb.6G004770.1	TCT-motif	motif_sequence	part of a light responsive element
Streb.6G004770.1	TGA-element	AACGAC	part of a light responsive element
Streb.6G004770.1	TGA-element	CCGAAA	auxin-responsive element
Streb.6G004770.1	LTR	GATGATGTGG	auxin-responsive element
Streb.6G004770.1	O2-site	GGTTAAT	cis-acting element involved in low-temperature responsiveness
Streb.6G004770.1	GT1-motif	TGACG	cis-acting regulatory element involved in zein metabolism regulation
Streb.6G004770.1	TGACG-motif	CAACGG	light responsive element
Streb.6G004770.1	CCAAT-box	CAACGG	cis-acting regulatory element involved in the MeJA-responsiveness
Streb.6G004770.1	CCAAT-box	CAACGG	MYBHv1 binding site
Streb.6G004770.1	CCAAT-box	GCCACT	MYBHv1 binding site
Streb.6G004770.1	CAT-box	GCCACT	MYBHv1 binding site
Streb.6G004770.1	CAT-box	GCCACT	cis-acting regulatory element related to meristem expression
Streb.6G004770.1	CAT-box	AAACCA	cis-acting regulatory element related to meristem expression
Streb.6G004770.1	ARE	AAACCA	cis-acting regulatory element related to meristem expression
Streb.6G004770.1	ARE	TCTGTTG	cis-acting regulatory element essential for the anaerobic induction
Streb.6G004770.1	GARE-motif	ACGTG	cis-acting regulatory element essential for the anaerobic induction
Streb.6G004770.1	ABRE	CACGTG	gibberellin-responsive element
Streb.6G004770.1	ABRE	ACGTG	cis-acting element involved in the abscisic acid responsiveness
Streb.6G004770.1	ABRE	GGGCGG	cis-acting element involved in the abscisic acid responsiveness
Streb.6G004770.1	Sp1	GGGCGG	cis-acting element involved in the abscisic acid responsiveness
Streb.6G004770.1	Sp1	CGTCA	light responsive element
Streb.6G004770.1	CGTCA-motif	CAAAGATATC	light responsive element
Streb.6G004770.1	circadian	CTTTATCA	cis-acting regulatory element involved in the MeJA-responsiveness
Streb.6G004770.1	LAMP-element	CACGTG	cis-acting regulatory element involved in circadian control
Streb.6G004770.1	G-box	CCTTTTG	part of a light responsive element
Streb.6G004770.1	P-box	TATAAATA	cis-acting regulatory element involved in light responsiveness
Streb.6G004770.1	CAAT-box	CACGTG	gibberellin-responsive element
Streb.6G004770.1	G-Box	AATCTAATCC	cis-acting regulatory element involved in light responsiveness
Streb.6G009510.1	ATCT-motif	AACCTAA	cis-acting regulatory element involved in light responsiveness
Streb.6G009510.1	MRE	CCGTCC	part of a conserved DNA module involved in light responsiveness
Streb.6G009510.1	A-box	GATGA(C/T)(A/G)TG(A/G)	MYB binding site involved in light responsiveness
Streb.6G009510.1	O2-site	ATTCTCTAAC	cis-acting regulatory element
Streb.6G009510.1	TC-rich repeats	TGACG	cis-acting regulatory element involved in zein metabolism regulation
Streb.6G009510.1	TGACG-motif	TGACG	cis-acting element involved in defense and stress responsiveness
Streb.6G009510.1	TGACG-motif	TGACG	cis-acting regulatory element involved in the MeJA-responsiveness
Streb.6G009510.1	TGACG-motif	TGACG	cis-acting regulatory element involved in the MeJA-responsiveness
Streb.6G009510.1	TGACG-motif	motif_sequence	cis-acting regulatory element involved in the MeJA-responsiveness
Streb.6G009510.1	CAAT-box	TACGTG	cis-acting regulatory element involved in the MeJA-responsiveness
Streb.6G009510.1	G-box	CACGTC	MYB binding site involved in drought-inducibility
Streb.6G009510.1	G-box	CTTTATCA	cis-acting regulatory element involved in light responsiveness
Streb.6G009510.1	LAMP-element	ATTAAT	cis-acting regulatory element involved in light responsiveness
Streb.6G009510.1	Box 4	ATTAAT	part of a light responsive element
Streb.6G009510.1	Box 4	CGTCA	part of a conserved DNA module involved in light responsiveness
Streb.6G009510.1	CGTCA-motif	CGTCA	part of a conserved DNA module involved in light responsiveness
Streb.6G009510.1	CGTCA-motif	CGTCA	cis-acting regulatory element involved in the MeJA-responsiveness
Streb.6G009510.1	CGTCA-motif	CGTCA	cis-acting regulatory element involved in the MeJA-responsiveness
Streb.6G009510.1	CGTCA-motif	AAACCA	cis-acting regulatory element involved in the MeJA-responsiveness
Streb.6G009510.1	ARE	AAACCA	cis-acting regulatory element involved in the MeJA-responsiveness
Streb.6G009510.1	ARE	TCTGTTG	cis-acting regulatory element essential for the anaerobic induction
Streb.6G009510.1	GARE-motif	ACGTG	cis-acting regulatory element essential for the anaerobic induction
Streb.6G009510.1	ABRE	ACGTG	gibberellin-responsive element
Streb.6G009510.1	ABRE	CAACGG	cis-acting element involved in the abscisic acid responsiveness
Streb.6G020290.1	CCAAT-box	CAACGG	cis-acting element involved in the abscisic acid responsiveness
Streb.6G020290.1	CCAAT-box	CAACGG	MYBHv1 binding site
Streb.6G020290.1	CCAAT-box	GGTTAA	MYBHv1 binding site
Streb.6G020290.1	GT1-motif	GGTTAA	MYBHv1 binding site
Streb.6G020290.1	GT1-motif	GGTTAA	light responsive element
Streb.6G020290.1	GT1-motif	TGACG	light responsive element
Streb.6G020290.1	TGACG-motif	TGACG	light responsive element
Streb.6G020290.1	TGACG-motif	TGACG	cis-acting regulatory element involved in the MeJA-responsiveness
Streb.6G020290.1	TGACG-motif	CCACGTGGC	cis-acting regulatory element involved in the MeJA-responsiveness
Streb.6G020290.1	Box II	CCCCCG	cis-acting regulatory element involved in the MeJA-responsiveness
Streb.6G020290.1	GC-motif	TCTTAC	part of a light responsive element
Streb.6G020290.1	TCT-motif	TTACTTAA	enhancer-like element involved in anoxic specific inducibility
Streb.6G020290.1	chs-CMA1a	TGAGTCA	part of a light responsive element
Streb.6G020290.1	GCN4_motif	ATAGAAATCAA	part of a light responsive element
Streb.6G020290.1	AT-rich element	CCGAAA	cis-regulatory element involved in endosperm expression
Streb.6G020290.1	LTR	CCGAAA	binding site of AT-rich DNA binding protein (ATBP-1)
Streb.6G020290.1	LTR	CCGAAA	cis-acting element involved in low-temperature responsiveness
Streb.6G020290.1	LTR	motif_sequence	cis-acting element involved in low-temperature responsiveness
Streb.6G020290.1	MBS	CAACTG	cis-acting element involved in low-temperature responsiveness
Streb.6G020290.1	MBS	CACGTC	MYB binding site involved in drought-inducibility
Streb.6G020290.1	G-box	GCCACGTGGA	MYB binding site involved in drought-inducibility
Streb.6G020290.1	G-box	CACGTG	cis-acting regulatory element involved in light responsiveness
Streb.6G020290.1	G-box	GCCACGTGGA	cis-acting regulatory element involved in light responsiveness
Streb.6G020290.1	G-box	ACACGTGGC	cis-acting regulatory element involved in light responsiveness
Streb.6G020290.1	G-box	CACGTG	cis-acting regulatory element involved in light responsiveness
Streb.6G020290.1	G-box	CACGTG	cis-acting regulatory element involved in light responsiveness
Streb.6G020290.1	G-box	CACGTG	cis-acting regulatory element involved in light responsiveness
Streb.6G020290.1	G-box	TACGTG	cis-acting regulatory element involved in light responsiveness
Streb.6G020290.1	G-box	TAAACGTG	cis-acting regulatory element involved in light responsiveness
Streb.6G020290.1	G-box	CAAAT	cis-acting regulatory element involved in light responsiveness
Streb.6G020290.1	CAAT-box	CACGTG	cis-acting regulatory element involved in light responsiveness
Streb.6G020290.1	G-Box	CACGTG	part of a light responsive element
Streb.6G020290.1	G-Box	CACGTG	cis-acting regulatory element involved in light responsiveness
Streb.6G020290.1	G-Box	CACGTG	cis-acting regulatory element involved in light responsiveness
Streb.6G020290.1	G-Box	CACGTT	cis-acting regulatory element involved in light responsiveness
Streb.6G020290.1	G-Box	TATA	cis-acting regulatory element involved in light responsiveness
Streb.6G020290.1	ABRE	CACGTG	cis-acting regulatory element involved in light responsiveness
Streb.6G020290.1	ABRE	ACGTG	cis-acting element involved in the abscisic acid responsiveness
Streb.6G020290.1	ABRE	GACACGTGGC	cis-acting element involved in the abscisic acid responsiveness
Streb.6G020290.1	ABRE	CACGTG	cis-acting element involved in the abscisic acid responsiveness
Streb.6G020290.1	ABRE	ACGTG	cis-acting element involved in the abscisic acid responsiveness
Streb.6G020290.1	ABRE	CACGTG	cis-acting element involved in the abscisic acid responsiveness
Streb.6G020290.1	ABRE	ACGTG	cis-acting element involved in the abscisic acid responsiveness
Streb.6G020290.1	ABRE	CACGTG	cis-acting element involved in the abscisic acid responsiveness
Streb.6G020290.1	ABRE	ACGTG	cis-acting element involved in the abscisic acid responsiveness
Streb.6G020290.1	ABRE	ACGTG	cis-acting element involved in the abscisic acid responsiveness
Streb.6G020290.1	ABRE	ACGTG	cis-acting element involved in the abscisic acid responsiveness
Streb.6G020290.1	ABRE	AAACCA	cis-acting element involved in the abscisic acid responsiveness
Streb.6G020290.1	ARE	AAACCA	cis-acting element involved in the abscisic acid responsiveness
Streb.6G020290.1	ARE	AAACCA	cis-acting regulatory element essential for the anaerobic induction
Streb.6G020290.1	ARE	AAACCA	cis-acting regulatory element essential for the anaerobic induction
Streb.6G020290.1	ARE	CGTCA	cis-acting regulatory element essential for the anaerobic induction
Streb.6G020290.1	CGTCA-motif	CGTCA	cis-acting regulatory element essential for the anaerobic induction
Streb.6G020290.1	CGTCA-motif	CGTCA	cis-acting regulatory element involved in the MeJA-responsiveness
Streb.6G020290.1	CGTCA-motif	GGGCGG	cis-acting regulatory element involved in the MeJA-responsiveness
Streb.6G020290.1	Sp1	AAACCA	cis-acting regulatory element involved in the MeJA-responsiveness
Streb.6G025310.1	ARE	AAACCA	light responsive element
Streb.6G025310.1	ARE	AAACCA	cis-acting regulatory element essential for the anaerobic induction
Streb.6G025310.1	ARE	AAACCA	cis-acting regulatory element essential for the anaerobic induction
Streb.6G025310.1	ARE	AAACCA	cis-acting regulatory element essential for the anaerobic induction
Streb.6G025310.1	ARE	AAACCA	cis-acting regulatory element essential for the anaerobic induction
Streb.6G025310.1	ARE	AAACCA	cis-acting regulatory element essential for the anaerobic induction
Streb.6G025310.1	ARE	AAACCA	cis-acting regulatory element essential for the anaerobic induction
Streb.6G025310.1	ARE	ATTAAT	cis-acting regulatory element essential for the anaerobic induction
Streb.6G025310.1	Box 4	ATTAAT	cis-acting regulatory element essential for the anaerobic induction
Streb.6G025310.1	Box 4	motif_sequence	part of a conserved DNA module involved in light responsiveness
[truncated: 860 more rows]

## Sheet: S6
Table S6. Homologous genes of the S. rebaudiana bZIP gene family in A. thaliana.
queryItem	stringId	identity	bitscore	preferredName	annotation
SrbZIP1	3702.AT1G06850.1	65.9	153.3	bZIP52	Similar to bZIP transcription factors; Basic leucine-zipper 52 (bZIP52); Its function is described as DNA binding, sequence-specific DNA binding transcription factor activity; Involved in regulation of transcription, DNA-dependent; Expressed in 23 plant structures; Expressed during 15 growth stages; Contains the following InterPro domains: Basic-leucine zipper (bZIP) transcription factor (InterPr…
SrbZIP2	3702.AT1G06070.1	63.7	393.3	AT1G06070	Basic-leucine zipper (bZIP) transcription factor family protein; Its function is described as DNA binding, sequence-specific DNA binding transcription factor activity; Involved in regulation of transcription, DNA-dependent; Located in chloroplast; Expressed in 23 plant structures; Expressed during 13 growth stages; Contains the following InterPro domains: Basic-leucine zipper (bZIP) transcription…
SrbZIP3	3702.AT2G22850.2	43.8	74.3	bZIP6	Putative embryo-abundant protein; Basic leucine-zipper 6 (bZIP6); Its function is described as DNA binding, sequence-specific DNA binding transcription factor activity; Involved in regulation of transcription, DNA-dependent; Located in nucleus; Expressed in 24 plant structures; Expressed during 12 growth stages; Contains the following InterPro domains: Basic-leucine zipper (bZIP) transcription fa…
SrbZIP4	3702.AT3G56850.1	50.7	216.5	AREB3	ABSCISIC ACID-INSENSITIVE 5-like protein 2; Binds to the embryo specification element and the ABA- responsive element (ABRE) of the Dc3 gene promoter. Could participate in abscisic acid-regulated gene expression during seed development
SrbZIP4	3702.AT2G41070.3	52.3	216.1	EEL	Basic-leucine zipper (bZIP) transcription factor family protein; Binds to the embryo specification element and the ABA- responsive element (ABRE) of the Dc3 gene promoter and to the ABRE of the Em1 gene promoter. Could participate in abscisic acid- regulated gene expression during seed development; Belongs to the bZIP family. ABI5 subfamily
SrbZIP5	3702.AT2G40950.1	45.9	414.8	BZIP17	Basic-leucine zipper (bzip) transcription factor family protein; Transcriptional activator involved in salt and osmotic stress responses. Functions as a stress sensor and transducer in a signaling pathway that resembles an ER stress response. Following salt stress, BZIP17 is cleaved by SBT6.1 (S1P) and S2P at the C-terminus and the N- terminal bZIP component is translocated to the nucleus, where …
SrbZIP6	3702.AT5G15830.1	59.1	55.1	bZIP3	Putative bZIP transcription factor AtbZip3; Basic leucine-zipper 3 (bZIP3); Its function is described as DNA binding, sequence-specific DNA binding transcription factor activity; Involved in regulation of transcription, DNA-dependent; Expressed in 9 plant structures; Expressed during 6 growth stages; Contains the following InterPro domains: Basic-leucine zipper (bZIP) transcription factor (InterP…
SrbZIP7	3702.AT2G36270.1	49.9	293.9	ABI5	Basic-leucine zipper (bzip) transcription factor family protein; Encodes a member of the basic leucine zipper transcription factor family, involved in ABA signalling during seed maturation and germination. The Arabidopsis abscisic acid (ABA)-insensitive abi5 mutants have pleiotropic defects in ABA response, including decreased sensitivity to ABA inhibition of germination and altered expression of…
SrbZIP8	3702.AT5G06950.1	71.6	438.7	AHBP-1B	Tgacg sequence-specific binding protein 2; bZIP transcription factor family protein; Transcriptional activator that binds specifically to the DNA sequence 5'-TGACG-3'. Recognizes ocs elements like the as-1 motif of the cauliflower mosaic virus 35S promoter. Binding to the as-1-like cis elements mediate auxin- and salicylic acid-inducible transcription. Required to induce the systemic acquired res…
SrbZIP9	3702.AT5G06950.1	71.6	438	AHBP-1B	Tgacg sequence-specific binding protein 2; bZIP transcription factor family protein; Transcriptional activator that binds specifically to the DNA sequence 5'-TGACG-3'. Recognizes ocs elements like the as-1 motif of the cauliflower mosaic virus 35S promoter. Binding to the as-1-like cis elements mediate auxin- and salicylic acid-inducible transcription. Required to induce the systemic acquired res…
SrbZIP10	3702.AT2G40950.1	40.8	376.3	BZIP17	Basic-leucine zipper (bzip) transcription factor family protein; Transcriptional activator involved in salt and osmotic stress responses. Functions as a stress sensor and transducer in a signaling pathway that resembles an ER stress response. Following salt stress, BZIP17 is cleaved by SBT6.1 (S1P) and S2P at the C-terminus and the N- terminal bZIP component is translocated to the nucleus, where …
SrbZIP11	3702.AT5G06950.1	65.6	365.9	AHBP-1B	Tgacg sequence-specific binding protein 2; bZIP transcription factor family protein; Transcriptional activator that binds specifically to the DNA sequence 5'-TGACG-3'. Recognizes ocs elements like the as-1 motif of the cauliflower mosaic virus 35S promoter. Binding to the as-1-like cis elements mediate auxin- and salicylic acid-inducible transcription. Required to induce the systemic acquired res…
SrbZIP12	3702.AT1G68640.1	60.3	473	PAN	Tgacg sequence-specific binding protein 8; bZIP transcription factor family protein; Transcriptional activator involved in the determination of floral organ number. Acts to determine floral organ patterning by establishing floral organ primordia in specific numbers and positions. Plays a role in regulating stem cell fate by directly controlling AG expression. Binds to the 5'-AAGAAT-3' cis-acting …
SrbZIP13	3702.AT3G10800.1	53.6	75.1	BZIP28	Basic-leucine zipper (bZIP) transcription factor family protein; Encodes bZIP28, a putative membrane-tethered transcriptional factor. Up-regulated in response to heat; a bZIP28 null mutant has a heat-sensitive phenotype. bZIP28 has a similar domain structure to the mammalian ATF6 protein involved in the unfolded protein response (UPR), and shares a bZIP domain, transmembrane domain, and a canonic…
SrbZIP14	3702.AT4G35040.1	57.3	157.9	bZIP19	Basic-leucine zipper (bzip) transcription factor family protein; Transcription factor involved in the response to zinc ion deficiency. Binds to the consensus sequence 5'-[AG]TGTCGACA[CT]-3' also called zinc deficiency response element (ZDRE). The ZDRE sequence is conserved in the plant kingdom and present in the promoters of genes that constitute the primary response to zinc deficiency, comprisin…
SrbZIP15	3702.AT4G35040.1	57.3	157.9	bZIP19	Basic-leucine zipper (bzip) transcription factor family protein; Transcription factor involved in the response to zinc ion deficiency. Binds to the consensus sequence 5'-[AG]TGTCGACA[CT]-3' also called zinc deficiency response element (ZDRE). The ZDRE sequence is conserved in the plant kingdom and present in the promoters of genes that constitute the primary response to zinc deficiency, comprisin…
SrbZIP20	3702.AT1G75390.1	38.8	91.3	bZIP44	Basic leucine-zipper 44; Transcription factor that binds to the DNA G-box motif 5'- CACGTG-3' of MAN7 promoter. Involved in the positive regulation of seed germination through MAN7 gene activation. MAN7 is required for both, loosening of the micropylar endosperm, and rupture of the seed coat in germinating seeds
SrbZIP21	3702.AT5G65210.2	55.4	364.4	TGA1	bZIP transcription factor family protein; Transcriptional activator that binds specifically to the DNA sequence 5'-TGACG-3'. Recognizes ocs elements like the as-1 motif of the cauliflower mosaic virus 35S promoter. Binding to the as-1-like cis elements mediate auxin- and salicylic acid-inducible transcription. May be involved in the induction of the systemic acquired resistance (SAR) via its inte…
SrbZIP22	3702.AT5G28770.2	33	124.4	BZO2H3	Arabidopsis thaliana basic leucine zipper 63; bZIP transcription factor family protein; bZIP protein BZO2H3 mRNA, partial cds
SrbZIP23	3702.AT4G35900.1	42.4	88.6	FD	Basic-leucine zipper (bZIP) transcription factor family protein; bZIP protein required for positive regulation of flowering. Mutants are late flowering. FD interacts with FT to promote flowering.Expressed in the shoot apex in floral anlagen, then declines in floral primordia
SrbZIP24	3702.AT4G35900.1	38.7	62.4	FD	Basic-leucine zipper (bZIP) transcription factor family protein; bZIP protein required for positive regulation of flowering. Mutants are late flowering. FD interacts with FT to promote flowering.Expressed in the shoot apex in floral anlagen, then declines in floral primordia
SrbZIP25	3702.AT5G15830.1	56.3	96.3	bZIP3	Putative bZIP transcription factor AtbZip3; Basic leucine-zipper 3 (bZIP3); Its function is described as DNA binding, sequence-specific DNA binding transcription factor activity; Involved in regulation of transcription, DNA-dependent; Expressed in 9 plant structures; Expressed during 6 growth stages; Contains the following InterPro domains: Basic-leucine zipper (bZIP) transcription factor (InterP…
SrbZIP26	3702.AT5G15830.1	52	102.1	bZIP3	Putative bZIP transcription factor AtbZip3; Basic leucine-zipper 3 (bZIP3); Its function is described as DNA binding, sequence-specific DNA binding transcription factor activity; Involved in regulation of transcription, DNA-dependent; Expressed in 9 plant structures; Expressed during 6 growth stages; Contains the following InterPro domains: Basic-leucine zipper (bZIP) transcription factor (InterP…
SrbZIP27	3702.AT5G15830.1	52	104.4	bZIP3	Putative bZIP transcription factor AtbZip3; Basic leucine-zipper 3 (bZIP3); Its function is described as DNA binding, sequence-specific DNA binding transcription factor activity; Involved in regulation of transcription, DNA-dependent; Expressed in 9 plant structures; Expressed during 6 growth stages; Contains the following InterPro domains: Basic-leucine zipper (bZIP) transcription factor (InterP…
SrbZIP28	3702.AT5G15830.1	47.6	68.6	bZIP3	Putative bZIP transcription factor AtbZip3; Basic leucine-zipper 3 (bZIP3); Its function is described as DNA binding, sequence-specific DNA binding transcription factor activity; Involved in regulation of transcription, DNA-dependent; Expressed in 9 plant structures; Expressed during 6 growth stages; Contains the following InterPro domains: Basic-leucine zipper (bZIP) transcription factor (InterP…
SrbZIP29	3702.AT4G36730.1	54.9	127.9	GBF1	G-box binding factor 1; Binds to the G-box motif (5'-CCACGTGG-3') of the rbcS-1A gene promoter. G-box and G-box-like motifs are cis-acting elements defined in promoters of certain plant genes which are regulated by such diverse stimuli as light-induction or hormone control. Binds to the G-box motif 5'-CACGTG-3' of LHCB2.4 (At3g27690) promoter. May act as transcriptional activator in light-regulat…
SrbZIP30	3702.AT2G18160.1	44.6	83.6	bZIP2	Floral transition at the meristem3; Transcription factor that binds to specific DNA sequences in target gene promoters. BZIP2-BZIP63-KIN10 complex binds to the ETFQO promoter to up-regulate its transcription
SrbZIP31	3702.AT1G77920.1	47.4	295.8	TGA7	bZIP transcription factor family protein; Transcriptional activator that binds specifically to the DNA sequence 5'-TGACG-3'. Recognizes ocs elements like the as-1 motif of the cauliflower mosaic virus 35S promoter. Binding to the as-1-like cis elements mediate auxin- and salicylic acid-inducible transcription. May be involved in the induction of the systemic acquired resistance (SAR) via its inte…
SrbZIP32	3702.AT1G43700.1	45	202.6	VIP1	VIRE2-interacting protein 1; Transcription activator that binds specifically to the VIP1 response elements (VREs) DNA sequence 5'-ACNGCT-3' found in some stress genes (e.g. TRX8 and MYB44), when phosphorylated/activated by MPK3. Required for Agrobacterium VirE2 nuclear import and tumorigenicity. Promotes transient expression of T-DNA in early stages by interacting with VirE2 in complex with the T…
SrbZIP33	3702.AT5G24800.1	48.3	186.4	BZIP9	Basic leucine zipper 9; Encodes bZIP protein BZO2H2; Belongs to the bZIP family
SrbZIP34	3702.AT1G32150.1	56.2	219.5	bZIP68	Basic region/leucine zipper transcription factor 68; Transcriptional activator that binds to the G-box motif (5'- CACGTG-3') and other cis-acting elements with 5'-ACGT-3' core, such as Hex, C-box and as-1 motifs. Possesses high binding affinity to G-box, much lower affinity to Hex and C-box, and little affinity to as-1 element . G-box and G-box-like motifs are cis-acting elements defined in promo…
SrbZIP35	3702.AT1G32150.1	59	256.9	bZIP68	Basic region/leucine zipper transcription factor 68; Transcriptional activator that binds to the G-box motif (5'- CACGTG-3') and other cis-acting elements with 5'-ACGT-3' core, such as Hex, C-box and as-1 motifs. Possesses high binding affinity to G-box, much lower affinity to Hex and C-box, and little affinity to as-1 element . G-box and G-box-like motifs are cis-acting elements defined in promo…
SrbZIP36	3702.AT5G24800.1	48.4	186.4	BZIP9	Basic leucine zipper 9; Encodes bZIP protein BZO2H2; Belongs to the bZIP family
SrbZIP37	3702.AT2G42380.2	44.3	148.3	BZIP34	Basic-leucine zipper (bzip) transcription factor family protein; Transcriptional activator involved in the sporophytic control of cell wall patterning and gametophytic control of pollen development. May play a role in the control of metabolic pathways regulating cellular transport and lipid metabolism
SrbZIP38	3702.AT3G19290.3	34.2	150.6	ABF4	ABSCISIC ACID-INSENSITIVE 5-like protein 7; Functions as transcriptional activator in the ABA- inducible expression of rd29B. Binds specifically to the ABA- responsive element (ABRE) of the rd29B gene promoter
SrbZIP39	3702.AT3G62420.1	32.3	54.7	BZIP53	Basic region/leucine zipper motif 53; Transcription activator that binds DNA to the C-box-like motif (5'-TGCTGACGTCA-3'), ABRE elements, G-box-like motif (5'- CCACGTGGCC-3'), DOF (5'-AAAG-3'), I-box (5'-GATAA-3'), BS1 (5'-AGCGGG- 3'), MY3 (5'-CGACG-3'), 5'-CAGTGCGC-3' and 5'-ACTCAT-3' sequence in target gene promoters DNA-binding and subsequent transcription activation is triggered by heterodimer…
SrbZIP40	3702.AT3G62420.1	35	59.7	BZIP53	Basic region/leucine zipper motif 53; Transcription activator that binds DNA to the C-box-like motif (5'-TGCTGACGTCA-3'), ABRE elements, G-box-like motif (5'- CCACGTGGCC-3'), DOF (5'-AAAG-3'), I-box (5'-GATAA-3'), BS1 (5'-AGCGGG- 3'), MY3 (5'-CGACG-3'), 5'-CAGTGCGC-3' and 5'-ACTCAT-3' sequence in target gene promoters DNA-binding and subsequent transcription activation is triggered by heterodimer…
SrbZIP41	3702.AT1G06070.1	58.1	293.9	AT1G06070	Basic-leucine zipper (bZIP) transcription factor family protein; Its function is described as DNA binding, sequence-specific DNA binding transcription factor activity; Involved in regulation of transcription, DNA-dependent; Located in chloroplast; Expressed in 23 plant structures; Expressed during 13 growth stages; Contains the following InterPro domains: Basic-leucine zipper (bZIP) transcription…
SrbZIP42	3702.AT1G06070.1	58.4	297.7	AT1G06070	Basic-leucine zipper (bZIP) transcription factor family protein; Its function is described as DNA binding, sequence-specific DNA binding transcription factor activity; Involved in regulation of transcription, DNA-dependent; Located in chloroplast; Expressed in 23 plant structures; Expressed during 13 growth stages; Contains the following InterPro domains: Basic-leucine zipper (bZIP) transcription…
SrbZIP43	3702.AT1G06070.1	57.4	290.8	AT1G06070	Basic-leucine zipper (bZIP) transcription factor family protein; Its function is described as DNA binding, sequence-specific DNA binding transcription factor activity; Involved in regulation of transcription, DNA-dependent; Located in chloroplast; Expressed in 23 plant structures; Expressed during 13 growth stages; Contains the following InterPro domains: Basic-leucine zipper (bZIP) transcription…
SrbZIP44	3702.AT1G19490.1	34.5	129.8	AT1G19490	Basic-leucine zipper (bZIP) transcription factor family protein; Its function is described as DNA binding, sequence-specific DNA binding transcription factor activity; Involved in regulation of transcription, DNA-dependent; Located in chloroplast; Contains the following InterPro domains: Basic-leucine zipper (bZIP) transcription factor (InterPro:IPR004827), bZIP transcription factor, bZIP-1 (Inte…
SrbZIP45	3702.AT5G28770.2	38	217.2	BZO2H3	Arabidopsis thaliana basic leucine zipper 63; bZIP transcription factor family protein; bZIP protein BZO2H3 mRNA, partial cds
SrbZIP46	3702.AT5G28770.2	37.9	213.8	BZO2H3	Arabidopsis thaliana basic leucine zipper 63; bZIP transcription factor family protein; bZIP protein BZO2H3 mRNA, partial cds
SrbZIP47	3702.AT4G35900.1	40.5	115.9	FD	Basic-leucine zipper (bZIP) transcription factor family protein; bZIP protein required for positive regulation of flowering. Mutants are late flowering. FD interacts with FT to promote flowering.Expressed in the shoot apex in floral anlagen, then declines in floral primordia
SrbZIP48	3702.AT5G15830.1	53.1	118.2	bZIP3	Putative bZIP transcription factor AtbZip3; Basic leucine-zipper 3 (bZIP3); Its function is described as DNA binding, sequence-specific DNA binding transcription factor activity; Involved in regulation of transcription, DNA-dependent; Expressed in 9 plant structures; Expressed during 6 growth stages; Contains the following InterPro domains: Basic-leucine zipper (bZIP) transcription factor (InterP…
SrbZIP49	3702.AT2G22850.2	43.4	57.8	bZIP6	Putative embryo-abundant protein; Basic leucine-zipper 6 (bZIP6); Its function is described as DNA binding, sequence-specific DNA binding transcription factor activity; Involved in regulation of transcription, DNA-dependent; Located in nucleus; Expressed in 24 plant structures; Expressed during 12 growth stages; Contains the following InterPro domains: Basic-leucine zipper (bZIP) transcription fa…
SrbZIP50	3702.AT4G36730.1	54.5	137.1	GBF1	G-box binding factor 1; Binds to the G-box motif (5'-CCACGTGG-3') of the rbcS-1A gene promoter. G-box and G-box-like motifs are cis-acting elements defined in promoters of certain plant genes which are regulated by such diverse stimuli as light-induction or hormone control. Binds to the G-box motif 5'-CACGTG-3' of LHCB2.4 (At3g27690) promoter. May act as transcriptional activator in light-regulat…
SrbZIP51	3702.AT1G45249.3	42.1	238.4	ABF2	Abscisic acid responsive elements-binding protein 2; Leucine zipper transcription factor that binds to the abscisic acid (ABA)-responsive element (ABRE) motif in the promoter region of ABA-inducible genes. Enhances drought tolerance in vegetative tissues. Required for normal glucose response. Localized in the nucleus. Expressed constitutively in roots, leaf vascular tissues, and hydathodes or in …
SrbZIP52	3702.AT2G18160.1	42.4	85.5	bZIP2	Floral transition at the meristem3; Transcription factor that binds to specific DNA sequences in target gene promoters. BZIP2-BZIP63-KIN10 complex binds to the ETFQO promoter to up-regulate its transcription
SrbZIP53	3702.AT5G15830.1	46	82	bZIP3	Putative bZIP transcription factor AtbZip3; Basic leucine-zipper 3 (bZIP3); Its function is described as DNA binding, sequence-specific DNA binding transcription factor activity; Involved in regulation of transcription, DNA-dependent; Expressed in 9 plant structures; Expressed during 6 growth stages; Contains the following InterPro domains: Basic-leucine zipper (bZIP) transcription factor (InterP…
SrbZIP54	3702.AT5G11260.1	59	112.8	HY5	Basic-leucine zipper (bzip) transcription factor family protein; Basic leucine zipper (bZIP) transcription factor. Nuclear localization. Involved in light-regulated transcriptional activation of G-box-containing promoters. Negatively regulated by Cop1. Although cytokinins do not appear to affect the gene's promoter activity, they appear to stabilize the protein. HY5 plays a role in anthocyanin ac…
SrbZIP55	3702.AT1G43700.1	40.9	141.7	VIP1	VIRE2-interacting protein 1; Transcription activator that binds specifically to the VIP1 response elements (VREs) DNA sequence 5'-ACNGCT-3' found in some stress genes (e.g. TRX8 and MYB44), when phosphorylated/activated by MPK3. Required for Agrobacterium VirE2 nuclear import and tumorigenicity. Promotes transient expression of T-DNA in early stages by interacting with VirE2 in complex with the T…
SrbZIP56	3702.AT4G34590.1	49.1	94.7	GBF6	Arabidopsis thaliana basic leucine-zipper 11; Transcription factor that binds to the DNA sequence 5'- ACTCAT-3' in target gene promoters. Promotes POX1/PRODH1 expression in response to hypoosmolarity stress . Positively regulates the expression of ASN1 and POX2/PRODH2 genes, which are involved in amino acid metabolism . Regulates several metabolic pathways such as myo-inositol, raffinose and treh…
SrbZIP57	3702.AT3G19290.3	45.6	283.1	ABF4	ABSCISIC ACID-INSENSITIVE 5-like protein 7; Functions as transcriptional activator in the ABA- inducible expression of rd29B. Binds specifically to the ABA- responsive element (ABRE) of the rd29B gene promoter
SrbZIP58	3702.AT3G62420.1	42.6	88.2	BZIP53	Basic region/leucine zipper motif 53; Transcription activator that binds DNA to the C-box-like motif (5'-TGCTGACGTCA-3'), ABRE elements, G-box-like motif (5'- CCACGTGGCC-3'), DOF (5'-AAAG-3'), I-box (5'-GATAA-3'), BS1 (5'-AGCGGG- 3'), MY3 (5'-CGACG-3'), 5'-CAGTGCGC-3' and 5'-ACTCAT-3' sequence in target gene promoters DNA-binding and subsequent transcription activation is triggered by heterodimer…
SrbZIP59	3702.AT2G42380.2	48.5	163.3	BZIP34	Basic-leucine zipper (bzip) transcription factor family protein; Transcriptional activator involved in the sporophytic control of cell wall patterning and gametophytic control of pollen development. May play a role in the control of metabolic pathways regulating cellular transport and lipid metabolism
SrbZIP60	3702.AT1G03970.1	41.4	80.9	GBF4	G-box binding factor 4; Binds to the G-box motif (5'-CCACGTGG-3') of the rbcS-1A gene promoter. G-box and G-box-like motifs are cis-acting elements defined in promoters of certain plant genes which are regulated by such diverse stimuli as light-induction or hormone control; Belongs to the bZIP family
SrbZIP61	3702.AT3G56850.1	52.1	253.8	AREB3	ABSCISIC ACID-INSENSITIVE 5-like protein 2; Binds to the embryo specification element and the ABA- responsive element (ABRE) of the Dc3 gene promoter. Could participate in abscisic acid-regulated gene expression during seed development
SrbZIP62	3702.AT3G62420.1	55.9	149.1	BZIP53	Basic region/leucine zipper motif 53; Transcription activator that binds DNA to the C-box-like motif (5'-TGCTGACGTCA-3'), ABRE elements, G-box-like motif (5'- CCACGTGGCC-3'), DOF (5'-AAAG-3'), I-box (5'-GATAA-3'), BS1 (5'-AGCGGG- 3'), MY3 (5'-CGACG-3'), 5'-CAGTGCGC-3' and 5'-ACTCAT-3' sequence in target gene promoters DNA-binding and subsequent transcription activation is triggered by heterodimer…
SrbZIP63	3702.AT2G46270.1	42.3	148.3	GBF3	Plant g-box-binding factor; Encodes a bZIP G-box binding protein whose expression is induced by ABA. It has been shown to bind to Adh that contains the G-box and is induced by cold and water deprivation. GBF3 has been shown to be expressed mostly in the root and dark-grown leaves. GBF3 can act as homodimers and as heterodimers with GFB1, GBF2 and GBF4. In addition, GBF3s DNA binding activity is e…
SrbZIP64	3702.AT5G15830.1	46	94.7	bZIP3	Putative bZIP transcription factor AtbZip3; Basic leucine-zipper 3 (bZIP3); Its function is described as DNA binding, sequence-specific DNA binding transcription factor activity; Involved in regulation of transcription, DNA-dependent; Expressed in 9 plant structures; Expressed during 6 growth stages; Contains the following InterPro domains: Basic-leucine zipper (bZIP) transcription factor (InterP…
SrbZIP65	3702.AT5G10030.1	48	277.3	TGA4	TGACG motif-binding factor 4; Transcriptional activator that binds specifically to the DNA sequence 5'-TGACG-3'. Recognizes ocs elements like the as-1 motif of the cauliflower mosaic virus 35S promoter. Binding to the as-1-like cis elements mediate auxin- and salicylic acid-inducible transcription. May be involved in the induction of the systemic acquired resistance (SAR) via its interaction with…
SrbZIP66	3702.AT5G65210.2	49.6	296.2	TGA1	bZIP transcription factor family protein; Transcriptional activator that binds specifically to the DNA sequence 5'-TGACG-3'. Recognizes ocs elements like the as-1 motif of the cauliflower mosaic virus 35S promoter. Binding to the as-1-like cis elements mediate auxin- and salicylic acid-inducible transcription. May be involved in the induction of the systemic acquired resistance (SAR) via its inte…
SrbZIP67	3702.AT4G35900.1	53.4	54.3	FD	Basic-leucine zipper (bZIP) transcription factor family protein; bZIP protein required for positive regulation of flowering. Mutants are late flowering. FD interacts with FT to promote flowering.Expressed in the shoot apex in floral anlagen, then declines in floral primordia
SrbZIP68	3702.AT4G35900.1	49.3	60.1	FD	Basic-leucine zipper (bZIP) transcription factor family protein; bZIP protein required for positive regulation of flowering. Mutants are late flowering. FD interacts with FT to promote flowering.Expressed in the shoot apex in floral anlagen, then declines in floral primordia
SrbZIP69	3702.AT5G65210.2	50.5	330.1	TGA1	bZIP transcription factor family protein; Transcriptional activator that binds specifically to the DNA sequence 5'-TGACG-3'. Recognizes ocs elements like the as-1 motif of the cauliflower mosaic virus 35S promoter. Binding to the as-1-like cis elements mediate auxin- and salicylic acid-inducible transcription. May be involved in the induction of the systemic acquired resistance (SAR) via its inte…
SrbZIP70	3702.AT1G42990.1	48	94.7	BZIP60	Basic region/leucine zipper motif 60; AtbZIP60 consists of a bZIP DNA binding domain followed by a putative transmembrane domain. GFP fusions containing the first 260 amino acids (AtbZIP60deltaC) are nuclear-localized. AtbZIP60 is upregulated by the addition of tunicamycin (ER stress response inductor), DTT (inhibitor of disulfide bond formation) and azetin-2-carboxylate (proline analog perturbin…
SrbZIP71	3702.AT4G35900.1	57.1	63.5	FD	Basic-leucine zipper (bZIP) transcription factor family protein; bZIP protein required for positive regulation of flowering. Mutants are late flowering. FD interacts with FT to promote flowering.Expressed in the shoot apex in floral anlagen, then declines in floral primordia
SrbZIP72	3702.AT4G35900.1	58.6	64.7	FD	Basic-leucine zipper (bZIP) transcription factor family protein; bZIP protein required for positive regulation of flowering. Mutants are late flowering. FD interacts with FT to promote flowering.Expressed in the shoot apex in floral anlagen, then declines in floral primordia
SrbZIP73	3702.AT5G06950.1	70.4	418.3	AHBP-1B	Tgacg sequence-specific binding protein 2; bZIP transcription factor family protein; Transcriptional activator that binds specifically to the DNA sequence 5'-TGACG-3'. Recognizes ocs elements like the as-1 motif of the cauliflower mosaic virus 35S promoter. Binding to the as-1-like cis elements mediate auxin- and salicylic acid-inducible transcription. Required to induce the systemic acquired res…
SrbZIP75	3702.AT2G22850.2	39.8	74.3	bZIP6	Putative embryo-abundant protein; Basic leucine-zipper 6 (bZIP6); Its function is described as DNA binding, sequence-specific DNA binding transcription factor activity; Involved in regulation of transcription, DNA-dependent; Located in nucleus; Expressed in 24 plant structures; Expressed during 12 growth stages; Contains the following InterPro domains: Basic-leucine zipper (bZIP) transcription fa…
SrbZIP76	3702.AT5G04840.1	39.4	176	AT5G04840	Uncharacterized protein At5g04840; bZIP protein; Its function is described as DNA binding, sequence-specific DNA binding transcription factor activity; Involved in regulation of transcription, DNA-dependent; Expressed in 12 plant structures; Expressed during 6 growth stages; Contains the following InterPro domains: Basic-leucine zipper (bZIP) transcription factor (InterPro:IPR004827); BEST Arabid…
SrbZIP78	3702.AT5G06839.3	55.5	424.1	TGA10	Bzip transcription factor family protein; Together with TGA9, basic leucine-zipper transcription factor required for anther development, probably via the activation of SPL expression in anthers and via the regulation of genes with functions in early and middle tapetal development . Required for signaling responses to pathogen-associated molecular patterns (PAMPs) such as flg22 that involves chlor…
SrbZIP79	3702.AT5G06839.3	55.5	424.1	TGA10	Bzip transcription factor family protein; Together with TGA9, basic leucine-zipper transcription factor required for anther development, probably via the activation of SPL expression in anthers and via the regulation of genes with functions in early and middle tapetal development . Required for signaling responses to pathogen-associated molecular patterns (PAMPs) such as flg22 that involves chlor…
SrbZIP80	3702.AT3G56850.1	45.9	213	AREB3	ABSCISIC ACID-INSENSITIVE 5-like protein 2; Binds to the embryo specification element and the ABA- responsive element (ABRE) of the Dc3 gene promoter. Could participate in abscisic acid-regulated gene expression during seed development
SrbZIP81	3702.AT5G10030.1	56.5	336.3	TGA4	TGACG motif-binding factor 4; Transcriptional activator that binds specifically to the DNA sequence 5'-TGACG-3'. Recognizes ocs elements like the as-1 motif of the cauliflower mosaic virus 35S promoter. Binding to the as-1-like cis elements mediate auxin- and salicylic acid-inducible transcription. May be involved in the induction of the systemic acquired resistance (SAR) via its interaction with…
SrbZIP82	3702.AT5G10030.1	58.2	376.3	TGA4	TGACG motif-binding factor 4; Transcriptional activator that binds specifically to the DNA sequence 5'-TGACG-3'. Recognizes ocs elements like the as-1 motif of the cauliflower mosaic virus 35S promoter. Binding to the as-1-like cis elements mediate auxin- and salicylic acid-inducible transcription. May be involved in the induction of the systemic acquired resistance (SAR) via its interaction with…
SrbZIP83	3702.AT1G43700.1	42.5	181.8	VIP1	VIRE2-interacting protein 1; Transcription activator that binds specifically to the VIP1 response elements (VREs) DNA sequence 5'-ACNGCT-3' found in some stress genes (e.g. TRX8 and MYB44), when phosphorylated/activated by MPK3. Required for Agrobacterium VirE2 nuclear import and tumorigenicity. Promotes transient expression of T-DNA in early stages by interacting with VirE2 in complex with the T…
SrbZIP84	3702.AT2G40620.1	52.3	276.6	AT2G40620	Basic-leucine zipper (bzip) transcription factor family protein; Transcription factor that may participate with bZIP34 in the gametophytic control of pollen development
SrbZIP85	3702.AT3G62420.1	57.9	150.2	BZIP53	Basic region/leucine zipper motif 53; Transcription activator that binds DNA to the C-box-like motif (5'-TGCTGACGTCA-3'), ABRE elements, G-box-like motif (5'- CCACGTGGCC-3'), DOF (5'-AAAG-3'), I-box (5'-GATAA-3'), BS1 (5'-AGCGGG- 3'), MY3 (5'-CGACG-3'), 5'-CAGTGCGC-3' and 5'-ACTCAT-3' sequence in target gene promoters DNA-binding and subsequent transcription activation is triggered by heterodimer…
SrbZIP86	3702.AT2G46270.1	38.4	136	GBF3	Plant g-box-binding factor; Encodes a bZIP G-box binding protein whose expression is induced by ABA. It has been shown to bind to Adh that contains the G-box and is induced by cold and water deprivation. GBF3 has been shown to be expressed mostly in the root and dark-grown leaves. GBF3 can act as homodimers and as heterodimers with GFB1, GBF2 and GBF4. In addition, GBF3s DNA binding activity is e…
SrbZIP87	3702.AT1G32150.1	63.5	255	bZIP68	Basic region/leucine zipper transcription factor 68; Transcriptional activator that binds to the G-box motif (5'- CACGTG-3') and other cis-acting elements with 5'-ACGT-3' core, such as Hex, C-box and as-1 motifs. Possesses high binding affinity to G-box, much lower affinity to Hex and C-box, and little affinity to as-1 element . G-box and G-box-like motifs are cis-acting elements defined in promo…
SrbZIP88	3702.AT3G56850.1	52.4	242.3	AREB3	ABSCISIC ACID-INSENSITIVE 5-like protein 2; Binds to the embryo specification element and the ABA- responsive element (ABRE) of the Dc3 gene promoter. Could participate in abscisic acid-regulated gene expression during seed development
SrbZIP89	3702.AT1G45249.3	42.6	242.7	ABF2	Abscisic acid responsive elements-binding protein 2; Leucine zipper transcription factor that binds to the abscisic acid (ABA)-responsive element (ABRE) motif in the promoter region of ABA-inducible genes. Enhances drought tolerance in vegetative tissues. Required for normal glucose response. Localized in the nucleus. Expressed constitutively in roots, leaf vascular tissues, and hydathodes or in …
SrbZIP90	3702.AT1G58110.2	40.6	196.1	AT1G58110	Basic-leucine zipper (bZIP) transcription factor family protein; Its function is described as sequence-specific DNA binding, protein dimerization activity, DNA binding, sequence-specific DNA binding transcription factor activity; Involved in regulation of transcription, DNA-dependent; Located in cellular_component unknown; Expressed in 23 plant structures; Expressed during 13 growth stages; Conta…
SrbZIP91	3702.AT1G75390.1	39.9	79.7	bZIP44	Basic leucine-zipper 44; Transcription factor that binds to the DNA G-box motif 5'- CACGTG-3' of MAN7 promoter. Involved in the positive regulation of seed germination through MAN7 gene activation. MAN7 is required for both, loosening of the micropylar endosperm, and rupture of the seed coat in germinating seeds
SrbZIP92	3702.AT3G62420.1	39.6	72.4	BZIP53	Basic region/leucine zipper motif 53; Transcription activator that binds DNA to the C-box-like motif (5'-TGCTGACGTCA-3'), ABRE elements, G-box-like motif (5'- CCACGTGGCC-3'), DOF (5'-AAAG-3'), I-box (5'-GATAA-3'), BS1 (5'-AGCGGG- 3'), MY3 (5'-CGACG-3'), 5'-CAGTGCGC-3' and 5'-ACTCAT-3' sequence in target gene promoters DNA-binding and subsequent transcription activation is triggered by heterodimer…
SrbZIP93	3702.AT1G32150.1	59.5	239.2	bZIP68	Basic region/leucine zipper transcription factor 68; Transcriptional activator that binds to the G-box motif (5'- CACGTG-3') and other cis-acting elements with 5'-ACGT-3' core, such as Hex, C-box and as-1 motifs. Possesses high binding affinity to G-box, much lower affinity to Hex and C-box, and little affinity to as-1 element . G-box and G-box-like motifs are cis-acting elements defined in promo…
SrbZIP94	3702.AT5G24800.1	41.3	149.8	BZIP9	Basic leucine zipper 9; Encodes bZIP protein BZO2H2; Belongs to the bZIP family
SrbZIP95	3702.AT1G08320.3	59.6	536.2	TGA9	Bzip transcription factor family protein; Together with TGA10, basic leucine-zipper transcription factor required for anther development, probably via the activation of SPL expression in anthers and via the regulation of genes with functions in early and middle tapetal development . Required for signaling responses to pathogen-associated molecular patterns (PAMPs) such as flg22 that involves chlo…
SrbZIP96	3702.AT5G11260.1	61.8	100.5	HY5	Basic-leucine zipper (bzip) transcription factor family protein; Basic leucine zipper (bZIP) transcription factor. Nuclear localization. Involved in light-regulated transcriptional activation of G-box-containing promoters. Negatively regulated by Cop1. Although cytokinins do not appear to affect the gene's promoter activity, they appear to stabilize the protein. HY5 plays a role in anthocyanin ac…
SrbZIP97	3702.AT5G38800.1	43.5	91.3	bZIP43	Basic leucine-zipper 43; Probable transcription factor involved in somatic embryogenesis. Acts as positive regulator of BHLH109
SrbZIP98	3702.AT5G38800.1	43.5	91.7	bZIP43	Basic leucine-zipper 43; Probable transcription factor involved in somatic embryogenesis. Acts as positive regulator of BHLH109
SrbZIP99	3702.AT3G51960.2	52.7	67.8	BZIP24	Basic leucine zipper 24; Transcription factor involved in the regulation of salt stress response. Functions as a negative transcriptional regulator of salt stress acclimation response by regulating cation homeostasis . Regulates negatively the expression of genes contributing to ion and osmotic homeostasis during salt stress, such as the Na(+) transporter HKT1, the Na(+)/H(+) antiporter SOS1, the…
SrbZIP100	3702.AT4G38900.1	53	412.1	AT4G38900	Basic-leucine zipper (bZIP) transcription factor family protein; Its function is described as DNA binding, sequence-specific DNA binding transcription factor activity; Involved in regulation of transcription, DNA-dependent; Expressed in 24 plant structures; Expressed during 13 growth stages; Contains the following InterPro domains: Basic-leucine zipper (bZIP) transcription factor (InterPro:IPR004…
SrbZIP101	3702.AT2G42380.2	49.2	164.5	BZIP34	Basic-leucine zipper (bzip) transcription factor family protein; Transcriptional activator involved in the sporophytic control of cell wall patterning and gametophytic control of pollen development. May play a role in the control of metabolic pathways regulating cellular transport and lipid metabolism
SrbZIP102	3702.AT1G32150.1	44.1	78.2	bZIP68	Basic region/leucine zipper transcription factor 68; Transcriptional activator that binds to the G-box motif (5'- CACGTG-3') and other cis-acting elements with 5'-ACGT-3' core, such as Hex, C-box and as-1 motifs. Possesses high binding affinity to G-box, much lower affinity to Hex and C-box, and little affinity to as-1 element . G-box and G-box-like motifs are cis-acting elements defined in promo…
SrbZIP103	3702.AT5G15830.1	40.9	94.7	bZIP3	Putative bZIP transcription factor AtbZip3; Basic leucine-zipper 3 (bZIP3); Its function is described as DNA binding, sequence-specific DNA binding transcription factor activity; Involved in regulation of transcription, DNA-dependent; Expressed in 9 plant structures; Expressed during 6 growth stages; Contains the following InterPro domains: Basic-leucine zipper (bZIP) transcription factor (InterP…
SrbZIP104	3702.AT2G16770.1	49	151.4	bZIP23	Basic-leucine zipper (bzip) transcription factor family protein; Transcription factor involved in the response to zinc ion deficiency. Binds to the consensus sequence 5'-[AG]TGTCGACA[CT]-3' also called zinc deficiency response element (ZDRE). The ZDRE sequence is conserved in the plant kingdom and present in the promoters of genes that constitute the primary response to zinc deficiency, comprisin…
SrbZIP105	3702.AT2G21230.3	62.1	129.8	AT2G21230	Basic-leucine zipper (bZIP) transcription factor family protein; Its function is described as DNA binding, sequence-specific DNA binding transcription factor activity; Involved in regulation of transcription, DNA-dependent; Located in chloroplast; Expressed in 23 plant structures; Expressed during 13 growth stages; Contains the following InterPro domains: Basic-leucine zipper (bZIP) transcription…

## Sheet: S7
Table S7. Heat map of SrbZIP gene in six S. rebaudiana cultivars (110,11-14,1188,023,GP,GX)
	110	11-14	1188	023	GP	GX
SrbZIP1	5.10698	3.54391	1.55834	2.53263	1.78576	0.90252
SrbZIP2	14.2254	12.0928	9.73405	11.6805	20.3543	16.3345
SrbZIP3	0.305347	0.294716	0.537891	0.109537	0.121277	0.256971
SrbZIP4	5.88177	5.64083	3.57035	5.11826	7.4403	7.95276
SrbZIP5	28.7322	12.2383	7.4276	7.43082	18.6995	14.7907
SrbZIP6	0.0861977	0.278352	0	0.114588	0.506964	0.976931
SrbZIP7	0	0	0	0	0	0
SrbZIP8	5.54973	4.18313	4.26112	3.11251	4.77325	3.04045
SrbZIP9	10.5125	4.65117	3.92047	4.30895	6.39855	4.6912
SrbZIP10	7.00773	4.88851	4.08387	3.72923	7.73737	6.19658
SrbZIP11	8.8847	10.241	8.70297	13.9842	14.8313	16.4385
SrbZIP12	0.220857	0.26501	0.0970493	0.081415	0.0771933	0.115898
SrbZIP13	0.0284973	0.105056	0.153754	0	0	0.0617827
SrbZIP14	8.76662	6.89443	5.64911	7.40991	7.21408	7.1438
SrbZIP15	7.09209	5.79118	4.71	5.69589	6.19909	5.71004
SrbZIP16	2.89504	3.123	0.924042	0.786617	1.0365	0.950525
SrbZIP17	4.00862	5.43207	1.74417	1.7139	2.56395	1.1989
SrbZIP18	9.26714	10.7929	10.5028	7.27614	15.3591	12.8237
SrbZIP19	36.4555	34.4467	29.3994	35.7594	105.909	98.4462
SrbZIP20	1.0319	1.36221	0.584559	0.597959	1.6886	2.36195
SrbZIP21	5.95626	5.8826	8.32592	3.92768	11.1725	12.2983
SrbZIP22	5.8244	2.91933	4.81722	5.20748	6.1044	4.99
SrbZIP23	0	0	0	0	0	0
SrbZIP24	0	0	0	0	0	0
SrbZIP25	1.5968	0.596227	1.41209	0.231395	0.0212927	0.00477167
SrbZIP26	1.77104	1.07197	1.49333	0.177157	0.0222717	0.005008
SrbZIP27	1.71403	0.7659	9.77303	2.51654	0.159663	0.0197133
SrbZIP28	0	0.0655777	0	0.373948	0	0
SrbZIP29	6.87777	6.80609	3.47365	3.80564	9.69187	9.4246
SrbZIP30	71.3383	109.987	121.586	131.976	190.958	182.954
SrbZIP31	1.24656	4.8373	10.1444	7.22709	8.4443	10.7911
SrbZIP32	6.74572	6.37341	3.96154	5.04913	9.16179	7.24875
SrbZIP33	1.9534	2.72881	1.53642	3.41762	1.65985	1.33743
SrbZIP34	1.99823	2.30052	2.0329	1.88654	1.81268	2.01915
SrbZIP35	2.03254	1.6255	1.28804	1.21769	3.71644	2.74916
SrbZIP36	0.995266	1.30539	1.98565	2.13611	2.98244	2.71343
SrbZIP37	0.099082	0.240482	0.0320523	0	0	0
SrbZIP38	17.8681	23.0243	14.9016	7.60453	25.3575	31.5836
SrbZIP39	0	0	0.00794267	0.065377	0.232469	0.063201
SrbZIP40	1.36662	0.069308	0.141767	0.08556	0.508646	1.2842
SrbZIP41	0	0	0	0	0	0
SrbZIP42	0	0	0	0	0	0
SrbZIP43	0	0	0	0	0	0
SrbZIP44	0	0	0	0	0	0
SrbZIP45	0.15437	0.358807	20.6848	11.8229	18.3085	11.7861
SrbZIP46	34.7562	23.1113	8.79005	10.8702	19.4489	13.8889
SrbZIP47	0.408077	0.147912	0.0536657	0.0750717	0.182672	0.097796
SrbZIP48	12.4145	13.5943	17.3414	16.798	8.94091	7.85242
SrbZIP49	0.578004	0	0	0	0.0958093	0.171548
SrbZIP50	5.60767	4.77446	3.80501	4.29891	4.94154	5.38835
SrbZIP51	52.4784	31.9828	16.8306	47.5057	28.9939	31.8712
SrbZIP52	17.6868	15.7906	5.71004	8.04267	12.5407	13.5422
SrbZIP53	0.047112	0	0	0	0	0.0346477
SrbZIP54	106.189	80.6665	43.3844	73.7408	22.1604	21.906
SrbZIP55	19.7322	10.4123	9.44887	11.0634	31.6923	19.1301
SrbZIP56	0.828501	1.00619	1.01112	1.18353	8.3533	6.794
SrbZIP57	31.1216	44.7841	23.8443	42.3531	45.3558	54.4568
SrbZIP58	0.0602003	0.123934	0.007462	0.140273	0.022727	0.0638683
SrbZIP59	0.798593	1.02852	0.209178	0.301033	0	0.0845147
SrbZIP60	43.6967	27.0043	8.01795	17.0984	10.454	10.7001
SrbZIP61	4.09804	3.552	3.15396	3.50666	6.473	5.45283
SrbZIP62	5.87649	7.813	11.0824	6.26654	9.37345	15.4976
SrbZIP63	21.969	21.584	12.6541	15.2408	15.4997	14.7864
SrbZIP64	2.54483	3.84314	2.69802	3.52847	0.0111077	0.122438
SrbZIP65	3.73886	3.89405	5.99051	3.58706	6.69541	6.16007
SrbZIP66	1.7195	1.95432	5.14865	3.4198	4.36209	4.42691
SrbZIP67	11.6444	13.2865	11.7118	20.534	3.19369	1.91382
SrbZIP68	7.84086	9.22463	4.27656	18.486	1.79241	1.48117
SrbZIP69	5.19702	9.13861	23.6012	11.5048	6.89408	5.13174
SrbZIP70	41.3977	18.9751	10.5117	10.4255	18.9952	36.2342
SrbZIP71	0.48588	0.392217	3.23935	0.46172	0.172859	0.245953
SrbZIP72	10.8539	10.4254	8.40857	4.05992	1.78165	1.44484
SrbZIP73	15.4939	14.2631	16.4312	11.975	21.7933	21.9332
SrbZIP74	11.627	13.2142	3.69316	8.65485	3.35979	2.70458
SrbZIP75	3.08282	1.60048	0.837863	0.859825	1.39027	1.25814
SrbZIP76	0.577398	0.967894	0.345644	1.05076	0.711595	0.985567
SrbZIP77	0	0	0	0	0	0
SrbZIP78	0	0	0	0.0323417	0.0199237	0
SrbZIP79	0	0	0	0.0327873	0.0201983	0.00984933
SrbZIP80	5.45867	4.21449	7.54305	5.67752	8.019	7.98368
SrbZIP81	4.88956	4.78471	4.37837	6.19085	23.4607	24.4794
SrbZIP82	3.54571	3.76486	3.23533	3.94587	15.4257	14.7763
SrbZIP83	6.22405	4.80963	5.72318	5.53449	31.7706	21.0641
SrbZIP84	8.48096	7.51262	6.59101	6.19096	10.3499	7.54055
SrbZIP85	20.2977	22.7284	21.9362	19.4687	10.0896	13.6061
SrbZIP86	34.2594	45.3252	18.0042	42.7901	10.702	11.7055
SrbZIP87	5.21307	4.83912	4.10369	3.50298	6.29596	6.35882
SrbZIP88	2.14717	1.88986	1.81888	1.26339	2.68491	2.64423
SrbZIP89	24.6014	17.3994	11.0149	18.8713	26.5995	24.39
SrbZIP90	2.50753	2.55707	1.64933	2.95976	2.37428	2.63337
SrbZIP91	2.66449	1.98074	1.12554	0.55123	7.10084	8.50247
SrbZIP92	2.33454	1.93801	0.767539	1.42313	6.58727	11.7509
SrbZIP93	16.8409	9.30489	7.22686	9.6132	14.9814	10.0259
SrbZIP94	9.45082	7.07805	6.35598	7.44073	15.4513	12.9921
SrbZIP95	0.112329	0.152996	0.337513	0.198207	0.0598227	0.085637
SrbZIP96	22.5962	18.7868	7.96428	17.3987	6.41551	6.4926
SrbZIP97	0.559947	0.13603	0.559137	0.246778	0.094002	0.0738963
SrbZIP98	0.171403	0.048326	0.122029	0.0739907	0.210023	0.107489
SrbZIP99	0.961423	0.921807	1.19297	1.0889	0.944083	1.09796
SrbZIP100	70.0402	46.0452	31.2183	37.3891	45.0753	34.6214
SrbZIP101	0	0.06735	0	0	0	0
SrbZIP102	8.80211	7.04189	6.74479	6.70032	11.0426	10.8755
SrbZIP103	0.0453847	0	0	0	0	0
SrbZIP104	9.58688	8.70781	7.97818	9.5363	14.5395	10.2139
SrbZIP105	0.26163	0.0670093	0	0.116812	0	0.050349

## Sheet: S8
Homologous genes of the walnut bZIP gene family in A. thaliana
queryItem	stringId	identity	preferredName	annotation
SrbZIP54	3702.AT5G11260.1	0.59	HY5	Basic-leucine zipper (bzip) transcription factor family protein; Basic leucine zipper (bZIP) transcription factor. Nuclear localization. Involved in light-regulated transcriptional activation of G-box-containing promoters. Negatively regulated by Cop1. Although cytokinins do not appear to affect the gene's promoter activity, they appear to stabilize the protein. HY5 plays a role in anthocyanin ac…
SrbZIP100	3702.AT4G38900.1	0.53	AT4G38900	Basic-leucine zipper (bZIP) transcription factor family protein; Its function is described as DNA binding, sequence-specific DNA binding transcription factor activity; Involved in regulation of transcription, DNA-dependent; Expressed in 24 plant structures; Expressed during 13 growth stages; Contains the following InterPro domains: Basic-leucine zipper (bZIP) transcription factor (InterPro:IPR004…
SrbZIP32	3702.AT1G43700.1	0.45	VIP1	VIRE2-interacting protein 1; Transcription activator that binds specifically to the VIP1 response elements (VREs) DNA sequence 5'-ACNGCT-3' found in some stress genes (e.g. TRX8 and MYB44), when phosphorylated/activated by MPK3. Required for Agrobacterium VirE2 nuclear import and tumorigenicity. Promotes transient expression of T-DNA in early stages by interacting with VirE2 in complex with the T…
SrbZIP45	3702.AT5G28770.2	0.38	BZO2H3	Arabidopsis thaliana basic leucine zipper 63; bZIP transcription factor family protein; bZIP protein BZO2H3 mRNA, partial cds
SrbZIP10	3702.AT2G40950.1	0.408	BZIP17	Basic-leucine zipper (bzip) transcription factor family protein; Transcriptional activator involved in salt and osmotic stress responses. Functions as a stress sensor and transducer in a signaling pathway that resembles an ER stress response. Following salt stress, BZIP17 is cleaved by SBT6.1 (S1P) and S2P at the C-terminus and the N- terminal bZIP component is translocated to the nucleus, where …
SrbZIP21	3702.AT5G65210.2	0.554	TGA1	bZIP transcription factor family protein; Transcriptional activator that binds specifically to the DNA sequence 5'-TGACG-3'. Recognizes ocs elements like the as-1 motif of the cauliflower mosaic virus 35S promoter. Binding to the as-1-like cis elements mediate auxin- and salicylic acid-inducible transcription. May be involved in the induction of the systemic acquired resistance (SAR) via its inte…
SrbZIP104	3702.AT2G16770.1	0.49	bZIP23	Basic-leucine zipper (bzip) transcription factor family protein; Transcription factor involved in the response to zinc ion deficiency. Binds to the consensus sequence 5'-[AG]TGTCGACA[CT]-3' also called zinc deficiency response element (ZDRE). The ZDRE sequence is conserved in the plant kingdom and present in the promoters of genes that constitute the primary response to zinc deficiency, comprisin…
SrbZIP30	3702.AT2G18160.1	0.446	bZIP2	Floral transition at the meristem3; Transcription factor that binds to specific DNA sequences in target gene promoters. BZIP2-BZIP63-KIN10 complex binds to the ETFQO promoter to up-regulate its transcription
SrbZIP63	3702.AT2G46270.1	0.423	GBF3	Plant g-box-binding factor; Encodes a bZIP G-box binding protein whose expression is induced by ABA. It has been shown to bind to Adh that contains the G-box and is induced by cold and water deprivation. GBF3 has been shown to be expressed mostly in the root and dark-grown leaves. GBF3 can act as homodimers and as heterodimers with GFB1, GBF2 and GBF4. In addition, GBF3s DNA binding activity is e…
SrbZIP70	3702.AT1G42990.1	0.48	BZIP60	Basic region/leucine zipper motif 60; AtbZIP60 consists of a bZIP DNA binding domain followed by a putative transmembrane domain. GFP fusions containing the first 260 amino acids (AtbZIP60deltaC) are nuclear-localized. AtbZIP60 is upregulated by the addition of tunicamycin (ER stress response inductor), DTT (inhibitor of disulfide bond formation) and azetin-2-carboxylate (proline analog perturbin…
SrbZIP60	3702.AT1G03970.1	0.414	GBF4	G-box binding factor 4; Binds to the G-box motif (5'-CCACGTGG-3') of the rbcS-1A gene promoter. G-box and G-box-like motifs are cis-acting elements defined in promoters of certain plant genes which are regulated by such diverse stimuli as light-induction or hormone control; Belongs to the bZIP family
SrbZIP9	3702.AT5G06950.1	0.716	AHBP-1B	Tgacg sequence-specific binding protein 2; bZIP transcription factor family protein; Transcriptional activator that binds specifically to the DNA sequence 5'-TGACG-3'. Recognizes ocs elements like the as-1 motif of the cauliflower mosaic virus 35S promoter. Binding to the as-1-like cis elements mediate auxin- and salicylic acid-inducible transcription. Required to induce the systemic acquired res…
SrbZIP93	3702.AT1G32150.1	0.595	bZIP68	Basic region/leucine zipper transcription factor 68; Transcriptional activator that binds to the G-box motif (5'- CACGTG-3') and other cis-acting elements with 5'-ACGT-3' core, such as Hex, C-box and as-1 motifs. Possesses high binding affinity to G-box, much lower affinity to Hex and C-box, and little affinity to as-1 element . G-box and G-box-like motifs are cis-acting elements defined in promo…
SrbZIP102	3702.AT4G36730.1	0.524	GBF1	G-box binding factor 1; Binds to the G-box motif (5'-CCACGTGG-3') of the rbcS-1A gene promoter. G-box and G-box-like motifs are cis-acting elements defined in promoters of certain plant genes which are regulated by such diverse stimuli as light-induction or hormone control. Binds to the G-box motif 5'-CACGTG-3' of LHCB2.4 (At3g27690) promoter. May act as transcriptional activator in light-regulat…
Protein-protein interaction network between SrbZIP proteins and reported bZIP protein involved in terpenoid synthesis
node1	node2	score
AaABF3	AaTGA6	0.491
AaABF3	SrbZIP10	0.441
AaABF3	SrbZIP63	0.648
AaTGA6	AaABF3	0.491
AaTGA6	SrbZIP63	0.494
AabZIP1	OsbZIP79	0.524
AabZIP1	SrbZIP100	0.426
AabZIP1	SrbZIP32	0.643
AabZIP1	SrbZIP54	0.734
AabZIP1	SrbZIP63	0.815
AabZIP9	SrbZIP102	0.461
AabZIP9	SrbZIP30	0.629
AabZIP9	SrbZIP45	0.613
AabZIP9	SrbZIP70	0.817
OsTGAP1	SrbZIP63	0.449
OsbZIP79	AabZIP1	0.524
OsbZIP79	SrbZIP100	0.454
OsbZIP79	SrbZIP32	0.565
OsbZIP79	SrbZIP54	0.52
SrbZIP10	AaABF3	0.441
SrbZIP10	SrbZIP45	0.46
SrbZIP10	SrbZIP63	0.595
SrbZIP10	SrbZIP70	0.696
SrbZIP100	AabZIP1	0.426
SrbZIP100	OsbZIP79	0.454
SrbZIP100	SrbZIP32	0.588
SrbZIP100	SrbZIP54	0.5
SrbZIP102	AabZIP9	0.461
SrbZIP102	SrbZIP104	0.588
SrbZIP102	SrbZIP30	0.429
SrbZIP102	SrbZIP63	0.499
SrbZIP104	SrbZIP102	0.588
SrbZIP30	AabZIP9	0.629
SrbZIP30	SrbZIP102	0.429
SrbZIP30	SrbZIP45	0.604
SrbZIP30	SrbZIP54	0.533
SrbZIP30	SrbZIP63	0.549
SrbZIP30	SrbZIP70	0.633
SrbZIP32	AabZIP1	0.643
SrbZIP32	OsbZIP79	0.565
SrbZIP32	SrbZIP100	0.588
SrbZIP32	SrbZIP54	0.638
SrbZIP32	SrbZIP60	0.722
SrbZIP32	SrbZIP63	0.639
SrbZIP45	AabZIP9	0.613
SrbZIP45	SrbZIP10	0.46
SrbZIP45	SrbZIP30	0.604
SrbZIP54	AabZIP1	0.734
SrbZIP54	OsbZIP79	0.52
SrbZIP54	SrbZIP100	0.5
SrbZIP54	SrbZIP30	0.533
SrbZIP54	SrbZIP32	0.638
SrbZIP54	SrbZIP63	0.901
SrbZIP54	SrbZIP70	0.473
SrbZIP60	SrbZIP32	0.722
SrbZIP60	SrbZIP63	0.68
SrbZIP63	AaABF3	0.648
SrbZIP63	AaTGA6	0.494
SrbZIP63	AabZIP1	0.815
SrbZIP63	OsTGAP1	0.449
SrbZIP63	SrbZIP10	0.595
SrbZIP63	SrbZIP102	0.499
SrbZIP63	SrbZIP30	0.549
SrbZIP63	SrbZIP32	0.639
SrbZIP63	SrbZIP54	0.901
SrbZIP63	SrbZIP60	0.68
SrbZIP63	SrbZIP70	0.645
SrbZIP70	AabZIP9	0.817
SrbZIP70	SrbZIP10	0.696
SrbZIP70	SrbZIP30	0.633
SrbZIP70	SrbZIP54	0.473
SrbZIP70	SrbZIP63	0.645
Analysis of SrbZIP54protein interaction network
node1	node2	node1 annotation	node2 annotation	score
BBX21	HY5	Long hypocotyl under shade; Transcription activator that acts as positive regulator of seedling photomorphogenesis . Acts downstream of COP1 and play an important role in early and long-term adjustment of the shade avoidance syndrome (SAS) responses in natural environments	Basic-leucine zipper (bzip) transcription factor family protein; Basic leucine zipper (bZIP) transcription factor. Nuclear localization. Involved in light-regulated transcriptional activation of G-box-containing promoters. Negatively regulated by Cop1. Although cytokinins do not appear to affect the gene's promoter activity, they appear to stabilize the protein. HY5 plays a role in anthocyanin ac…	0.996
COP1	HY5	Arabidopsis thaliana constitutive photomorphogenic 1; Transducin/WD40 repeat-like superfamily protein; E3 ubiquitin-protein ligase that acts as a repressor of photomorphogenesis and as an activator of etiolation in darkness. E3 ubiquitin ligases accept ubiquitin from an E2 ubiquitin- conjugating enzyme in the form of a thioester and then directly transfers the ubiquitin to targeted substrates. Re…	Basic-leucine zipper (bzip) transcription factor family protein; Basic leucine zipper (bZIP) transcription factor. Nuclear localization. Involved in light-regulated transcriptional activation of G-box-containing promoters. Negatively regulated by Cop1. Although cytokinins do not appear to affect the gene's promoter activity, they appear to stabilize the protein. HY5 plays a role in anthocyanin ac…	0.999
DET1	HY5	Light-mediated development protein 1 / deetiolated1 (DET1); Component of light signal transduction machinery. Involved in repression of photomorphogenesis in darkness by participating in the CDD complex, a complex probably required to regulate the activity of ubiquitin conjugating enzymes (E2s). Involved in repression of deetiolation in the developing seedling. Repression of photomorphogenesis is…	Basic-leucine zipper (bzip) transcription factor family protein; Basic leucine zipper (bZIP) transcription factor. Nuclear localization. Involved in light-regulated transcriptional activation of G-box-containing promoters. Negatively regulated by Cop1. Although cytokinins do not appear to affect the gene's promoter activity, they appear to stabilize the protein. HY5 plays a role in anthocyanin ac…	0.971
FHY3	HY5	Protein FAR-RED ELONGATED HYPOCOTYL 3; Transcription activator that recognizes and binds to the DNA consensus sequence 5'-CACGCGC-3'. Activates the expression of FHY1 and FHL involved in light responses. When associated with PHYA, protects it from being recognized and degraded by the COP1/SPA complex. Positive regulator of chlorophyll biosynthesis via the activation of HEMB1 gene expression; Belo…	Basic-leucine zipper (bzip) transcription factor family protein; Basic leucine zipper (bZIP) transcription factor. Nuclear localization. Involved in light-regulated transcriptional activation of G-box-containing promoters. Negatively regulated by Cop1. Although cytokinins do not appear to affect the gene's promoter activity, they appear to stabilize the protein. HY5 plays a role in anthocyanin ac…	0.99
HY5	HYH	Basic-leucine zipper (bzip) transcription factor family protein; Basic leucine zipper (bZIP) transcription factor. Nuclear localization. Involved in light-regulated transcriptional activation of G-box-containing promoters. Negatively regulated by Cop1. Although cytokinins do not appear to affect the gene's promoter activity, they appear to stabilize the protein. HY5 plays a role in anthocyanin ac…	Transcription factor HY5-like; Transcription factor that promotes photomorphogenesis in light. Acts downstream of the light receptor network and directly affects transcription of light-induced genes. Specifically involved in the blue light specific pathway, suggesting that it participates in transmission of cryptochromes (CRY1 and CRY2) signals to downstream responses. In darkness, its degradatio…	0.98
HY5	LAF1	Basic-leucine zipper (bzip) transcription factor family protein; Basic leucine zipper (bZIP) transcription factor. Nuclear localization. Involved in light-regulated transcriptional activation of G-box-containing promoters. Negatively regulated by Cop1. Although cytokinins do not appear to affect the gene's promoter activity, they appear to stabilize the protein. HY5 plays a role in anthocyanin ac…	Transcription factor myb, plant; Transcription factor LAF1; Transcription factor that promotes photomorphogenesis in the light by participating in the transmission of phytochrome A (phyA) signals to downstream responses. Probably acts by activating expression of light- induced genes. In darkness, its degradation prevents the activation of light-induced genes	0.974
HY5	LZF1	Basic-leucine zipper (bzip) transcription factor family protein; Basic leucine zipper (bZIP) transcription factor. Nuclear localization. Involved in light-regulated transcriptional activation of G-box-containing promoters. Negatively regulated by Cop1. Although cytokinins do not appear to affect the gene's promoter activity, they appear to stabilize the protein. HY5 plays a role in anthocyanin ac…	annotation not available	0.978
HY5	PIF3	Basic-leucine zipper (bzip) transcription factor family protein; Basic leucine zipper (bZIP) transcription factor. Nuclear localization. Involved in light-regulated transcriptional activation of G-box-containing promoters. Negatively regulated by Cop1. Although cytokinins do not appear to affect the gene's promoter activity, they appear to stabilize the protein. HY5 plays a role in anthocyanin ac…	Phytochrome-associated protein 3; Transcription factor interacting with photoreceptors phyA and phyB. Forms a ternary complex in vitro with G-box element of the promoters of LHY, CCA1. Acts as a negative regulator of phyB signalling. It degrades rapidly after irradiation of dark grown seedlings in a process controlled by phytochromes. Does not play a significant role in controlling light input an…	0.984
HY5	SPA1	Basic-leucine zipper (bzip) transcription factor family protein; Basic leucine zipper (bZIP) transcription factor. Nuclear localization. Involved in light-regulated transcriptional activation of G-box-containing promoters. Negatively regulated by Cop1. Although cytokinins do not appear to affect the gene's promoter activity, they appear to stabilize the protein. HY5 plays a role in anthocyanin ac…	Encodes a member of the SPA (suppressor of phyA-105) protein family (SPA1-SPA4). SPA proteins contain an N-terminal serine/threonine kinase-like motif followed by a coiled-coil structure and a C-terminal WD-repeat domain. SPA1 is a PHYA signaling intermediate, putative regulator of PHYA signaling pathway. Light responsive repressor of photomorphogenesis. Involved in regulating circadian rhythms a…	0.974
HY5	STH	Basic-leucine zipper (bzip) transcription factor family protein; Basic leucine zipper (bZIP) transcription factor. Nuclear localization. Involved in light-regulated transcriptional activation of G-box-containing promoters. Negatively regulated by Cop1. Although cytokinins do not appear to affect the gene's promoter activity, they appear to stabilize the protein. HY5 plays a role in anthocyanin ac…	Salt tolerance homologue; Acts as negative regulator of seedling photomorphogenesis . BBX25/STH and BBX24/STO function as transcriptional corepressors of HY5 activity, leading to the down-regulation of BBX22 expression. BBX25/STH acts additively with BBX24/STO during de- etiolation and the hypocotyl shade avoidance response	0.965
SPA1	HY5	Encodes a member of the SPA (suppressor of phyA-105) protein family (SPA1-SPA4). SPA proteins contain an N-terminal serine/threonine kinase-like motif followed by a coiled-coil structure and a C-terminal WD-repeat domain. SPA1 is a PHYA signaling intermediate, putative regulator of PHYA signaling pathway. Light responsive repressor of photomorphogenesis. Involved in regulating circadian rhythms a…	Basic-leucine zipper (bzip) transcription factor family protein; Basic leucine zipper (bZIP) transcription factor. Nuclear localization. Involved in light-regulated transcriptional activation of G-box-containing promoters. Negatively regulated by Cop1. Although cytokinins do not appear to affect the gene's promoter activity, they appear to stabilize the protein. HY5 plays a role in anthocyanin ac…	0.974
Analysis of SrbZIP63protein interaction network
node1	node2	node1 annotation	node2 annotation	score
GBF3	ABF3	Plant g-box-binding factor; Encodes a bZIP G-box binding protein whose expression is induced by ABA. It has been shown to bind to Adh that contains the G-box and is induced by cold and water deprivation. GBF3 has been shown to be expressed mostly in the root and dark-grown leaves. GBF3 can act as homodimers and as heterodimers with GFB1, GBF2 and GBF4. In addition, GBF3s DNA binding activity is e…	Abscisic acid responsive elements-binding factor 3; Encodes an ABA-responsive element-binding protein with similarity to transcription factors that is expressed in response to stress and abscisic acid	0.731
GBF3	ABI5	Plant g-box-binding factor; Encodes a bZIP G-box binding protein whose expression is induced by ABA. It has been shown to bind to Adh that contains the G-box and is induced by cold and water deprivation. GBF3 has been shown to be expressed mostly in the root and dark-grown leaves. GBF3 can act as homodimers and as heterodimers with GFB1, GBF2 and GBF4. In addition, GBF3s DNA binding activity is e…	Basic-leucine zipper (bzip) transcription factor family protein; Encodes a member of the basic leucine zipper transcription factor family, involved in ABA signalling during seed maturation and germination. The Arabidopsis abscisic acid (ABA)-insensitive abi5 mutants have pleiotropic defects in ABA response, including decreased sensitivity to ABA inhibition of germination and altered expression of…	0.815
GBF3	AFP1	Plant g-box-binding factor; Encodes a bZIP G-box binding protein whose expression is induced by ABA. It has been shown to bind to Adh that contains the G-box and is induced by cold and water deprivation. GBF3 has been shown to be expressed mostly in the root and dark-grown leaves. GBF3 can act as homodimers and as heterodimers with GFB1, GBF2 and GBF4. In addition, GBF3s DNA binding activity is e…	Ninja-family protein AFP1; Acts as a negative regulator of abscisic acid (ABA) response during germination through the ubiquitin-mediated proteolysis of ABI5/DPBF1; Belongs to the Ninja family	0.694
GBF3	AP1	Plant g-box-binding factor; Encodes a bZIP G-box binding protein whose expression is induced by ABA. It has been shown to bind to Adh that contains the G-box and is induced by cold and water deprivation. GBF3 has been shown to be expressed mostly in the root and dark-grown leaves. GBF3 can act as homodimers and as heterodimers with GFB1, GBF2 and GBF4. In addition, GBF3s DNA binding activity is e…	K-box region and MADS-box transcription factor family protein; Transcription factor that promotes early floral meristem identity in synergy with LEAFY. Is required subsequently for the transition of an inflorescence meristem into a floral meristem. Is indispensable for normal development of sepals and petals in flowers. Regulates positively the B class homeotic proteins APETALA3 and PISTILLATA wi…	0.818
GBF3	COP1	Plant g-box-binding factor; Encodes a bZIP G-box binding protein whose expression is induced by ABA. It has been shown to bind to Adh that contains the G-box and is induced by cold and water deprivation. GBF3 has been shown to be expressed mostly in the root and dark-grown leaves. GBF3 can act as homodimers and as heterodimers with GFB1, GBF2 and GBF4. In addition, GBF3s DNA binding activity is e…	Arabidopsis thaliana constitutive photomorphogenic 1; Transducin/WD40 repeat-like superfamily protein; E3 ubiquitin-protein ligase that acts as a repressor of photomorphogenesis and as an activator of etiolation in darkness. E3 ubiquitin ligases accept ubiquitin from an E2 ubiquitin- conjugating enzyme in the form of a thioester and then directly transfers the ubiquitin to targeted substrates. Re…	0.724
GBF3	FLD	Plant g-box-binding factor; Encodes a bZIP G-box binding protein whose expression is induced by ABA. It has been shown to bind to Adh that contains the G-box and is induced by cold and water deprivation. GBF3 has been shown to be expressed mostly in the root and dark-grown leaves. GBF3 can act as homodimers and as heterodimers with GFB1, GBF2 and GBF4. In addition, GBF3s DNA binding activity is e…	Lysine-specific histone demethylase 1 homolog 3; Probable histone demethylase that promotes flowering independently of the photoperiod and vernalization pathways by repressing FLOWERING LOCUS C (FLC), a floral repressor that blocks the transition from vegetative to reproductive development. Probably mediates histone H3 'Lys-4' demethylation at FLC locus. Seems to act in partial redundancy with LD…	0.772
GBF3	FT	Plant g-box-binding factor; Encodes a bZIP G-box binding protein whose expression is induced by ABA. It has been shown to bind to Adh that contains the G-box and is induced by cold and water deprivation. GBF3 has been shown to be expressed mostly in the root and dark-grown leaves. GBF3 can act as homodimers and as heterodimers with GFB1, GBF2 and GBF4. In addition, GBF3s DNA binding activity is e…	PEBP (phosphatidylethanolamine-binding protein) family protein; Component of the mobile flower-promoting signal (floral stimulus or florigen). Promotes the transition from vegetative growth to flowering. Required for 'SEPALLATA3' (SEP3) and 'FRUITFULL' (FUL) accumulation in mature rosette leaves. Seems to acts in parallel with 'LEAFY' to induce flowering by regulating 'APETALA1'. Translated in le…	0.813
GBF3	HY5	Plant g-box-binding factor; Encodes a bZIP G-box binding protein whose expression is induced by ABA. It has been shown to bind to Adh that contains the G-box and is induced by cold and water deprivation. GBF3 has been shown to be expressed mostly in the root and dark-grown leaves. GBF3 can act as homodimers and as heterodimers with GFB1, GBF2 and GBF4. In addition, GBF3s DNA binding activity is e…	Basic-leucine zipper (bzip) transcription factor family protein; Basic leucine zipper (bZIP) transcription factor. Nuclear localization. Involved in light-regulated transcriptional activation of G-box-containing promoters. Negatively regulated by Cop1. Although cytokinins do not appear to affect the gene's promoter activity, they appear to stabilize the protein. HY5 plays a role in anthocyanin ac…	0.901
GBF3	TFL1	Plant g-box-binding factor; Encodes a bZIP G-box binding protein whose expression is induced by ABA. It has been shown to bind to Adh that contains the G-box and is induced by cold and water deprivation. GBF3 has been shown to be expressed mostly in the root and dark-grown leaves. GBF3 can act as homodimers and as heterodimers with GFB1, GBF2 and GBF4. In addition, GBF3s DNA binding activity is e…	PEBP (phosphatidylethanolamine-binding protein) family protein; Controls inflorescence meristem identity and is required for maintenance of a indeterminate inflorescence. Prevents the expression of 'APETALA1' and 'LEAFY'. Also plays a role in the regulation of the time of flowering in the long-day flowering pathway. May form complexes with phosphorylated ligands by interfering with kinases and th…	0.825
Analysis of SrbZIP32protein interaction network
node1	node2	node1 annotation	node2 annotation	score
VIP1	CRC	VIRE2-interacting protein 1; Transcription activator that binds specifically to the VIP1 response elements (VREs) DNA sequence 5'-ACNGCT-3' found in some stress genes (e.g. TRX8 and MYB44), when phosphorylated/activated by MPK3. Required for Agrobacterium VirE2 nuclear import and tumorigenicity. Promotes transient expression of T-DNA in early stages by interacting with VirE2 in complex with the T…	Plant-specific transcription factor YABBY family protein; Transcription factor required for the initiation of nectary development. Also involved in suppressing early radial growth of the gynoecium, in promoting its later elongation and in fusion of its carpels by regulating both cell division and expansion. Establishes the polar differentiation in the carpels by specifying abaxial cell fate in th…	0.75
VIP1	CSR1	VIRE2-interacting protein 1; Transcription activator that binds specifically to the VIP1 response elements (VREs) DNA sequence 5'-ACNGCT-3' found in some stress genes (e.g. TRX8 and MYB44), when phosphorylated/activated by MPK3. Required for Agrobacterium VirE2 nuclear import and tumorigenicity. Promotes transient expression of T-DNA in early stages by interacting with VirE2 in complex with the T…	Acetolactate synthase i/ii/iii large subunit; Chlorsulfuron/imidazolinone resistant 1; Catalyzes the formation of acetolactate from pyruvate, the first step in valine and isoleucine biosynthesis. Requires FAD, thiamine pyrophosphate and Mg. Inhibited by the sulphonylurea herbicide, chlorsulphuron, and the imidazolinone herbicide, imazapyr. The obtained crystal structure of acetohydroxyacid syntha…	0.729
VIP1	GBF4	VIRE2-interacting protein 1; Transcription activator that binds specifically to the VIP1 response elements (VREs) DNA sequence 5'-ACNGCT-3' found in some stress genes (e.g. TRX8 and MYB44), when phosphorylated/activated by MPK3. Required for Agrobacterium VirE2 nuclear import and tumorigenicity. Promotes transient expression of T-DNA in early stages by interacting with VirE2 in complex with the T…	G-box binding factor 4; Binds to the G-box motif (5'-CCACGTGG-3') of the rbcS-1A gene promoter. G-box and G-box-like motifs are cis-acting elements defined in promoters of certain plant genes which are regulated by such diverse stimuli as light-induction or hormone control; Belongs to the bZIP family	0.722
VIP1	IMPA-1	VIRE2-interacting protein 1; Transcription activator that binds specifically to the VIP1 response elements (VREs) DNA sequence 5'-ACNGCT-3' found in some stress genes (e.g. TRX8 and MYB44), when phosphorylated/activated by MPK3. Required for Agrobacterium VirE2 nuclear import and tumorigenicity. Promotes transient expression of T-DNA in early stages by interacting with VirE2 in complex with the T…	Importin subunit alpha-6/7; Binds to conventional NLS motifs with high affinity in the absence of an importin beta subunit. Mediates nuclear protein import across the nuclear envelope in vitro in the absence of exogenously added importin beta subunit . Acts as cellular receptor for the nuclear import of the virD2 protein of Agrobacterium, but is not essential for Agrobacterium-mediated root trans…	0.915
VIP1	MPK10	VIRE2-interacting protein 1; Transcription activator that binds specifically to the VIP1 response elements (VREs) DNA sequence 5'-ACNGCT-3' found in some stress genes (e.g. TRX8 and MYB44), when phosphorylated/activated by MPK3. Required for Agrobacterium VirE2 nuclear import and tumorigenicity. Promotes transient expression of T-DNA in early stages by interacting with VirE2 in complex with the T…	Mitogen-activated protein kinase 10; Member of MAP Kinase; Belongs to the protein kinase superfamily. CMGC Ser/Thr protein kinase family. MAP kinase subfamily	0.8
VIP1	MPK3	VIRE2-interacting protein 1; Transcription activator that binds specifically to the VIP1 response elements (VREs) DNA sequence 5'-ACNGCT-3' found in some stress genes (e.g. TRX8 and MYB44), when phosphorylated/activated by MPK3. Required for Agrobacterium VirE2 nuclear import and tumorigenicity. Promotes transient expression of T-DNA in early stages by interacting with VirE2 in complex with the T…	Mitogen-activated protein kinase 3; Involved in oxidative stress-mediated signaling cascade (such as ozone). Involved in the innate immune MAP kinase signaling cascade (MEKK1, MKK4/MKK5 and MPK3/MPK6) downstream of bacterial flagellin receptor FLS2. May be involved in hypersensitive response (HR)-mediated signaling cascade by modulating LIP5 phosphorylation and subsequent multivesicular bodies (M…	0.96
VIP1	MPK6	VIRE2-interacting protein 1; Transcription activator that binds specifically to the VIP1 response elements (VREs) DNA sequence 5'-ACNGCT-3' found in some stress genes (e.g. TRX8 and MYB44), when phosphorylated/activated by MPK3. Required for Agrobacterium VirE2 nuclear import and tumorigenicity. Promotes transient expression of T-DNA in early stages by interacting with VirE2 in complex with the T…	Mitogen-activated protein kinase 6; Involved in oxidative stress-mediated signaling cascade (such as ozone). Involved in the innate immune MAP kinase signaling cascade (MEKK1, MKK4/MKK5 and MPK3/MPK6) downstream of bacterial flagellin receptor FLS2. May be involved in hypersensitive response (HR)-mediated signaling cascade by modulating LIP5 phosphorylation and subsequent multivesicular bodies (M…	0.88
VIP1	PBRP	VIRE2-interacting protein 1; Transcription activator that binds specifically to the VIP1 response elements (VREs) DNA sequence 5'-ACNGCT-3' found in some stress genes (e.g. TRX8 and MYB44), when phosphorylated/activated by MPK3. Required for Agrobacterium VirE2 nuclear import and tumorigenicity. Promotes transient expression of T-DNA in early stages by interacting with VirE2 in complex with the T…	Transcription initiation factor tfiib; Plant-specific TFIIB-related protein that may be involved in an intracellular signaling pathway between plastids and the nucleus . May act as general transcription factor (GTF) of RNA polymerase I-dependent transcription and rRNA synthesis. Forms a ternary complex with TBP2 and the rDNA promoter region	0.807
VIP1	PP2-B14	VIRE2-interacting protein 1; Transcription activator that binds specifically to the VIP1 response elements (VREs) DNA sequence 5'-ACNGCT-3' found in some stress genes (e.g. TRX8 and MYB44), when phosphorylated/activated by MPK3. Required for Agrobacterium VirE2 nuclear import and tumorigenicity. Promotes transient expression of T-DNA in early stages by interacting with VirE2 in complex with the T…	VIP1-binding F-box protein; Phloem protein 2-B14; Component of SCF(VBF) E3 ubiquitin ligase complexes, which mediate the ubiquitination and subsequent proteasomal degradation of target proteins such as VIP1 and Agrobacterium virE2, after their implication in T-DNA translocation to the host nucleus (can functionally replace Agrobacterium VirF). Required during Agrobacterium-induced tumor formation	0.954
VIP1	SUE4	VIRE2-interacting protein 1; Transcription activator that binds specifically to the VIP1 response elements (VREs) DNA sequence 5'-ACNGCT-3' found in some stress genes (e.g. TRX8 and MYB44), when phosphorylated/activated by MPK3. Required for Agrobacterium VirE2 nuclear import and tumorigenicity. Promotes transient expression of T-DNA in early stages by interacting with VirE2 in complex with the T…	Alpha/beta hydrolase related protein; A gain-of-function mutant of SUE4 exhibited improved low sulphur tolerance	0.721
Analysis of SrbZIP45protein interaction network
node1	node2	node1 annotation	node2 annotation	score
BZO2H3	AKINBETA1	Arabidopsis thaliana basic leucine zipper 63; bZIP transcription factor family protein; bZIP protein BZO2H3 mRNA, partial cds	5'-AMP-activated protein kinase beta-2 subunit protein; Encodes AKINbeta1, a subunit of the SnRK1 kinase (Sucrose non-fermenting-1-related protein kinase). Involved in regulation of nitrogen and sugar metabolism	0.877
BZO2H3	AT1G43860	Arabidopsis thaliana basic leucine zipper 63; bZIP transcription factor family protein; bZIP protein BZO2H3 mRNA, partial cds	Sequence-specific DNA binding transcription factors; Contains the following InterPro domains: Ribosome maturation protein SBDS, C-terminal (InterPro:IPR018978), Ribosome maturation protein SBDS (InterPro:IPR002140), Ribosome maturation protein SBDS, N-terminal (InterPro:IPR019783), Ribosome maturation protein SBDS, conserved site (InterPro:IPR018023); Has 1053 Blast hits to 1042 proteins in 349 s…	0.715
BZO2H3	AT3G15450	Arabidopsis thaliana basic leucine zipper 63; bZIP transcription factor family protein; bZIP protein BZO2H3 mRNA, partial cds	Aluminium induced protein with YGL and LRDR motifs; Its function is described as molecular_function unknown; Expressed in 25 plant structures; Expressed during 13 growth stages; BEST Arabidopsis thaliana protein match is: Aluminium induced protein with YGL and LRDR motifs (TAIR:AT4G27450.1); Has 430 Blast hits to 430 proteins in 86 species: Archae - 0; Bacteria - 40; Metazoa - 2; Fungi - 2; Plant…	0.741
BZO2H3	AT5G22920	Arabidopsis thaliana basic leucine zipper 63; bZIP transcription factor family protein; bZIP protein BZO2H3 mRNA, partial cds	Ring finger and chy zinc finger domain-containing protein 1; Possesses E3 ubiquitin-protein ligase activity in vitro. Mediates mainly 'Lys-48'-linked polyubiquitination. Promotes abscisic acid (ABA)-induced stomatal closure, reactive oxygen species (ROS) production and drought tolerance . Involved in the regulation of stomatal aperture	0.902
BZO2H3	BZIP53	Arabidopsis thaliana basic leucine zipper 63; bZIP transcription factor family protein; bZIP protein BZO2H3 mRNA, partial cds	Basic region/leucine zipper motif 53; Transcription activator that binds DNA to the C-box-like motif (5'-TGCTGACGTCA-3'), ABRE elements, G-box-like motif (5'- CCACGTGGCC-3'), DOF (5'-AAAG-3'), I-box (5'-GATAA-3'), BS1 (5'-AGCGGG- 3'), MY3 (5'-CGACG-3'), 5'-CAGTGCGC-3' and 5'-ACTCAT-3' sequence in target gene promoters DNA-binding and subsequent transcription activation is triggered by heterodimer…	0.952
BZO2H3	DIN10	Arabidopsis thaliana basic leucine zipper 63; bZIP transcription factor family protein; bZIP protein BZO2H3 mRNA, partial cds	Probable galactinol--sucrose galactosyltransferase 6; Encodes a member of glycosyl hydrolase family 36. Expression is induced within 3 hours of dark treatment, in senescing leaves and treatment with exogenous photosynthesis inhibitor. Induction of gene expression was suppressed in excised leaves supplied with sugar. The authors suggest that the gene's expression pattern is responding to the level…	0.812
BZO2H3	FZF	Arabidopsis thaliana basic leucine zipper 63; bZIP transcription factor family protein; bZIP protein BZO2H3 mRNA, partial cds	Zinc finger protein 622; Pre-60S-associated factor involved in the cytoplasmic maturation of the 60S subunit. Involved in the dissociation and recycling of other late pre-60S factors before newly synthesized large ribosomal subunits enter translation (By similarity). Can complement the growth defect of a yeast mutant lacking REI1 . Required for leaf growth under cold temperature conditions	0.728
BZO2H3	LOS4	Arabidopsis thaliana basic leucine zipper 63; bZIP transcription factor family protein; bZIP protein BZO2H3 mRNA, partial cds	P-loop containing nucleoside triphosphate hydrolases superfamily protein; Encodes a putative DEAD-Box RNA Helicase and has RNA-dependent ATPase activity. Mutant is Sensitive to chilling stress and heat stress. Germination of the mutant is inhibited by ABA. LOS4 may be involved in temperature sensing. Is enriched in the nuclear envelope and also located in the cytoplasm. LOS4 is involved in export…	0.786
BZO2H3	bZIP1	Arabidopsis thaliana basic leucine zipper 63; bZIP transcription factor family protein; bZIP protein BZO2H3 mRNA, partial cds	Basic leucine zipper 1; Transcription factor that binds to the C-box-like motif (5'-TGCTGACGTCA-3') and G-box-like motif (5'-CCACGTGGCC-3'), ABRE elements, of gene promoters involved in sugar signaling. Activated by low energy stress both at transcriptional and post- transcriptional mechanisms. Promotes dark-induced senescence and participates in the transcriptional reprogramming of amino acid me…	0.973
Analysis of SrbZIP60protein interaction network
node1	node2	node1 annotation	node2 annotation	score
GBF4	AT5G42910	G-box binding factor 4; Binds to the G-box motif (5'-CCACGTGG-3') of the rbcS-1A gene promoter. G-box and G-box-like motifs are cis-acting elements defined in promoters of certain plant genes which are regulated by such diverse stimuli as light-induction or hormone control; Belongs to the bZIP family	Basic-leucine zipper (bZIP) transcription factor family protein; Could participate in abscisic acid-regulated gene expression; Belongs to the bZIP family. ABI5 subfamily	0.725
GBF4	GBF3	G-box binding factor 4; Binds to the G-box motif (5'-CCACGTGG-3') of the rbcS-1A gene promoter. G-box and G-box-like motifs are cis-acting elements defined in promoters of certain plant genes which are regulated by such diverse stimuli as light-induction or hormone control; Belongs to the bZIP family	Plant g-box-binding factor; Encodes a bZIP G-box binding protein whose expression is induced by ABA. It has been shown to bind to Adh that contains the G-box and is induced by cold and water deprivation. GBF3 has been shown to be expressed mostly in the root and dark-grown leaves. GBF3 can act as homodimers and as heterodimers with GFB1, GBF2 and GBF4. In addition, GBF3s DNA binding activity is e…	0.68
GBF4	OST1	G-box binding factor 4; Binds to the G-box motif (5'-CCACGTGG-3') of the rbcS-1A gene promoter. G-box and G-box-like motifs are cis-acting elements defined in promoters of certain plant genes which are regulated by such diverse stimuli as light-induction or hormone control; Belongs to the bZIP family	Serine/threonine-protein kinase SRK2E; Activator of the abscisic acid (ABA) signaling pathway that regulates numerous ABA responses, such as stomata closure in response to drought, plant pathogens, or decreases in atmospheric relative humidity (RH). Involved in the resistance to drought by avoiding water loss. Required for the stomata closure mediated by pathogen-associated molecular pattern (PAM…	0.655
GBF4	SNRK2-8	G-box binding factor 4; Binds to the G-box motif (5'-CCACGTGG-3') of the rbcS-1A gene promoter. G-box and G-box-like motifs are cis-acting elements defined in promoters of certain plant genes which are regulated by such diverse stimuli as light-induction or hormone control; Belongs to the bZIP family	Serine/threonine-protein kinase SRK2C; Involved in gene regulation and confers tolerance to drought and osmotic stress	0.614
GBF4	SNRK2.10	G-box binding factor 4; Binds to the G-box motif (5'-CCACGTGG-3') of the rbcS-1A gene promoter. G-box and G-box-like motifs are cis-acting elements defined in promoters of certain plant genes which are regulated by such diverse stimuli as light-induction or hormone control; Belongs to the bZIP family	Sucrose nonfermenting 1-related protein kinase 2-10; Serine/threonine-protein kinase SRK2B; Encodes a member of SNF1-related protein kinases (SnRK2) whose activity is activated by ionic (salt) and non-ionic (mannitol) osmotic stress	0.614
GBF4	SNRK2.2	G-box binding factor 4; Binds to the G-box motif (5'-CCACGTGG-3') of the rbcS-1A gene promoter. G-box and G-box-like motifs are cis-acting elements defined in promoters of certain plant genes which are regulated by such diverse stimuli as light-induction or hormone control; Belongs to the bZIP family	Serine/threonine-protein kinase SRK2D; Together with SRK2I, key component and activator of the abscisic acid (ABA) signaling pathway that regulates numerous ABA responses, such as seed germination, Pro accumulation, root growth inhibition, dormancy and seedling growth, and, to a lesser extent, stomatal closure	0.615
GBF4	SNRK2.3	G-box binding factor 4; Binds to the G-box motif (5'-CCACGTGG-3') of the rbcS-1A gene promoter. G-box and G-box-like motifs are cis-acting elements defined in promoters of certain plant genes which are regulated by such diverse stimuli as light-induction or hormone control; Belongs to the bZIP family	Sucrose nonfermenting 1(SNF1)-related protein kinase 2.3; Together with SRK2D, key component and activator of the abscisic acid (ABA) signaling pathway that regulates numerous ABA responses, such as seed germination, Pro accumulation, root growth inhibition, dormancy and seedling growth, and, to a lesser extent, stomatal closure; Belongs to the protein kinase superfamily. Ser/Thr protein kinase f…	0.615
GBF4	SNRK2.4	G-box binding factor 4; Binds to the G-box motif (5'-CCACGTGG-3') of the rbcS-1A gene promoter. G-box and G-box-like motifs are cis-acting elements defined in promoters of certain plant genes which are regulated by such diverse stimuli as light-induction or hormone control; Belongs to the bZIP family	Sucrose nonfermenting 1-related protein kinase 2-4; Serine/threonine-protein kinase SRK2A; Encodes a plant protein kinase similar to the calcium/calmodulin-dependent protein kinase subfamily and the SNF1 kinase subfamily (SnRK2) whose activity is activated by ionic (salt) and non-ionic (mannitol) osmotic stress. Kinase activity of its homolog in tobacco is induced by hyperosmotic condition within…	0.614
GBF4	VIP1	G-box binding factor 4; Binds to the G-box motif (5'-CCACGTGG-3') of the rbcS-1A gene promoter. G-box and G-box-like motifs are cis-acting elements defined in promoters of certain plant genes which are regulated by such diverse stimuli as light-induction or hormone control; Belongs to the bZIP family	VIRE2-interacting protein 1; Transcription activator that binds specifically to the VIP1 response elements (VREs) DNA sequence 5'-ACNGCT-3' found in some stress genes (e.g. TRX8 and MYB44), when phosphorylated/activated by MPK3. Required for Agrobacterium VirE2 nuclear import and tumorigenicity. Promotes transient expression of T-DNA in early stages by interacting with VirE2 in complex with the T…	0.722
GBF4	bZIP43	G-box binding factor 4; Binds to the G-box motif (5'-CCACGTGG-3') of the rbcS-1A gene promoter. G-box and G-box-like motifs are cis-acting elements defined in promoters of certain plant genes which are regulated by such diverse stimuli as light-induction or hormone control; Belongs to the bZIP family	Basic leucine-zipper 43; Probable transcription factor involved in somatic embryogenesis. Acts as positive regulator of BHLH109	0.619
Analysis of SrbZIP9protein interaction network
node1	node2	node1 annotation	node2 annotation	score
AHBP-1B	AT2G47880	Tgacg sequence-specific binding protein 2; bZIP transcription factor family protein; Transcriptional activator that binds specifically to the DNA sequence 5'-TGACG-3'. Recognizes ocs elements like the as-1 motif of the cauliflower mosaic virus 35S promoter. Binding to the as-1-like cis elements mediate auxin- and salicylic acid-inducible transcription. Required to induce the systemic acquired res…	Glutaredoxin family protein; Has a glutathione-disulfide oxidoreductase activity in the presence of NADPH and glutathione reductase. Reduces low molecular weight disulfides and proteins (By similarity)	0.867
AHBP-1B	BOP1	Tgacg sequence-specific binding protein 2; bZIP transcription factor family protein; Transcriptional activator that binds specifically to the DNA sequence 5'-TGACG-3'. Recognizes ocs elements like the as-1 motif of the cauliflower mosaic virus 35S promoter. Binding to the as-1-like cis elements mediate auxin- and salicylic acid-inducible transcription. Required to induce the systemic acquired res…	Ankyrin repeat family protein / BTB/POZ domain-containing protein; May act as a substrate-specific adapter of an E3 ubiquitin-protein ligase complex (CUL3-RBX1-BTB) which mediates the ubiquitination and subsequent proteasomal degradation of target proteins (By similarity). Acts redundantly with BOP2. BOP1/2 promote leaf and floral meristem fate and determinacy in a pathway targeting AP1 and AGL24…	0.905
AHBP-1B	GRX480	Tgacg sequence-specific binding protein 2; bZIP transcription factor family protein; Transcriptional activator that binds specifically to the DNA sequence 5'-TGACG-3'. Recognizes ocs elements like the as-1 motif of the cauliflower mosaic virus 35S promoter. Binding to the as-1-like cis elements mediate auxin- and salicylic acid-inducible transcription. Required to induce the systemic acquired res…	Thioredoxin superfamily protein; Encodes GRX480, a member of the glutaredoxin family that regulates protein redox state. GRX480 interacts with TGA factors and suppresses JA-responsive PDF1.2 transcription. GRX480 transcription is SA-inducible and requires NPR1. Maybe involved in SA/JA cross-talk	0.991
AHBP-1B	NIMIN1	Tgacg sequence-specific binding protein 2; bZIP transcription factor family protein; Transcriptional activator that binds specifically to the DNA sequence 5'-TGACG-3'. Recognizes ocs elements like the as-1 motif of the cauliflower mosaic virus 35S promoter. Binding to the as-1-like cis elements mediate auxin- and salicylic acid-inducible transcription. Required to induce the systemic acquired res…	Protein NIM1-INTERACTING 1; NIMIN1 modulates PR gene expression according the following model: NPR1 forms a ternary complex with NIMIN1 and TGA factors upon SAR induction that binds to a positive regulatory cis-element of the PR-1 promoter, termed LS7. This leads to PR-1 gene induction. NIMIN1 decreases transcriptional activation, possibly through its EAR motif, which results in fine-tuning of PR…	0.877
AHBP-1B	NPR1	Tgacg sequence-specific binding protein 2; bZIP transcription factor family protein; Transcriptional activator that binds specifically to the DNA sequence 5'-TGACG-3'. Recognizes ocs elements like the as-1 motif of the cauliflower mosaic virus 35S promoter. Binding to the as-1-like cis elements mediate auxin- and salicylic acid-inducible transcription. Required to induce the systemic acquired res…	Arabidopsis nonexpresser of pr genes 1; Regulatory protein (NPR1); May act as a substrate-specific adapter of an E3 ubiquitin-protein ligase complex (CUL3-RBX1-BTB) which mediates the ubiquitination and subsequent proteasomal degradation of target proteins (By similarity). Key positive regulator of the SA- dependent signaling pathway that negatively regulates JA-dependent signaling pathway. Media…	0.999
AHBP-1B	NPR3	Tgacg sequence-specific binding protein 2; bZIP transcription factor family protein; Transcriptional activator that binds specifically to the DNA sequence 5'-TGACG-3'. Recognizes ocs elements like the as-1 motif of the cauliflower mosaic virus 35S promoter. Binding to the as-1-like cis elements mediate auxin- and salicylic acid-inducible transcription. Required to induce the systemic acquired res…	Regulatory protein npr1; Regulatory protein NPR3; May act as a substrate-specific adapter of an E3 ubiquitin-protein ligase complex (CUL3-RBX1-BTB) which mediates the ubiquitination and subsequent proteasomal degradation of target proteins (By similarity). Involved in the regulation of basal defense responses against pathogens	0.996
AHBP-1B	NPR4	Tgacg sequence-specific binding protein 2; bZIP transcription factor family protein; Transcriptional activator that binds specifically to the DNA sequence 5'-TGACG-3'. Recognizes ocs elements like the as-1 motif of the cauliflower mosaic virus 35S promoter. Binding to the as-1-like cis elements mediate auxin- and salicylic acid-inducible transcription. Required to induce the systemic acquired res…	Regulatory protein NPR4; Encodes a ankyrin repeat BTB/POZ domain-containing protein with 36% sequence identity with NPR1. Mutants are more susceptible to the bacterial pathogen Pseudomonas syringe pv. tomato DC3000 and to the fungal pathogen Erysiphe cichoracearum, but do not differ markedly from wild type in interaction with virulent and avirulent strains of the oomycete Peronospora parasitica. …	0.994
AHBP-1B	ROXY1	Tgacg sequence-specific binding protein 2; bZIP transcription factor family protein; Transcriptional activator that binds specifically to the DNA sequence 5'-TGACG-3'. Recognizes ocs elements like the as-1 motif of the cauliflower mosaic virus 35S promoter. Binding to the as-1-like cis elements mediate auxin- and salicylic acid-inducible transcription. Required to induce the systemic acquired res…	Thioredoxin superfamily protein; Has a glutathione-disulfide oxidoreductase activity in the presence of NADPH and glutathione reductase. Reduces low molecular weight disulfides and proteins (By similarity). Involved in flower development as a regulator of petal primorida initiation and further petal morphogenesis. May mediate post-translational modifications of target proteins required for normal…	0.99
AHBP-1B	ROXY2	Tgacg sequence-specific binding protein 2; bZIP transcription factor family protein; Transcriptional activator that binds specifically to the DNA sequence 5'-TGACG-3'. Recognizes ocs elements like the as-1 motif of the cauliflower mosaic virus 35S promoter. Binding to the as-1-like cis elements mediate auxin- and salicylic acid-inducible transcription. Required to induce the systemic acquired res…	Thioredoxin superfamily protein; Has a glutathione-disulfide oxidoreductase activity in the presence of NADPH and glutathione reductase. Reduces low molecular weight disulfides and proteins (By similarity). Involved in flower development; Belongs to the glutaredoxin family. CC-type subfamily	0.898

## Sheet: S9
Table S9. Primers involved in bZIP gene family
Primer name	F-primer
SrbZIP54-q-F	CGGGTTCAAGGTATTTCTGAAGGT
SrbZIP54-q-R	TTCCAACTCTTTCACTCGTACCTC
SrbZIP100-q-F	TGACACAGAGGACGGCAATG
SrbZIP100-q-R	AGGATGAGACGGTGGCATTC
SrbZIP32-q-F	CAAGTGACAATGCTCCAACGG
SrbZIP32-q-R	TTGCGGGTTTGATGAATGCTG
SrbZIP45-q-F	CACCACAAACCGCCACATAC
SrbZIP45-q-R	ACAAGACGACCCGACATCAC
SrbZIP10-q-F	TCAACATCACCGCCACTGAA
SrbZIP10-q-R	CAGCACCGAAACCACCATTG
SrbZIP21-q-F	CCTTTTCTTGTGGATTGGCGG
SrbZIP21-q-R	GAGAATCTTCCGCTTGTTGGC
SrbZIP104-q-F	CGTGAAGCAGTAAGAAAGTACCG
SrbZIP104-q-R	CGACCCGATTTCTCCATCAATTC
SrbZIP30-q-F	CTTCAAGCGGTAATTCGTCTCAGAG
SrbZIP30-q-R	GGTGACGTTAATGGTGGTGAGAAT
SrbZIP63-q-F	ATGCTCCTCCGCCTTACATG
SrbZIP63-q-R	TGACATCGCCAACCCATCAA
SrbZIP70-q-F	CGTTGAACTGCGATGACTTTCTT
SrbZIP70-q-R	CAGCTGCATCTCTATTCCTCAGT
SrbZIP60-q-F	AGGATCTGCAACGACACCAG
SrbZIP60-q-R	AACCTTCATCCACCGCCTTT
SrbZIP19-q-F	TCCTCGTTCTGCCATCACAA
SrbZIP19-q-R	CCTCCCATCTCTTCTGCTCC
SrbZIP9-q-F	GCCAGACAGCAGGGAATCTT
SrbZIP9-q-R	GGAGTTCACCATCACCAGCA
SrbZIP93-q-F	TGGGAAGCAGTGAGAGGGATA
SrbZIP93-q-R	CATGTAGGGGTGAGCTTGAGG
SrbZIP102-q-F	CCACCACCAATGATGCCTGA
SrbZIP102-q-R	TTCCTCCGAGAGCCTCTGAA
β-ActinF	GTATTGCCGACAGGATGAGTAAGG
β-ActinR	TCTGTTGGAAGGTGCTGAGTGA
