# Supplementary figures and images for: Genome-Wide Identification and Expression Analysis of bZIP Family Genes in <em>Stevia rebaudiana</em> Bertoni
Source: Preprints.org preprint supplement (doi:10.20944/preprints202307.2017.v1), 2023-07-31

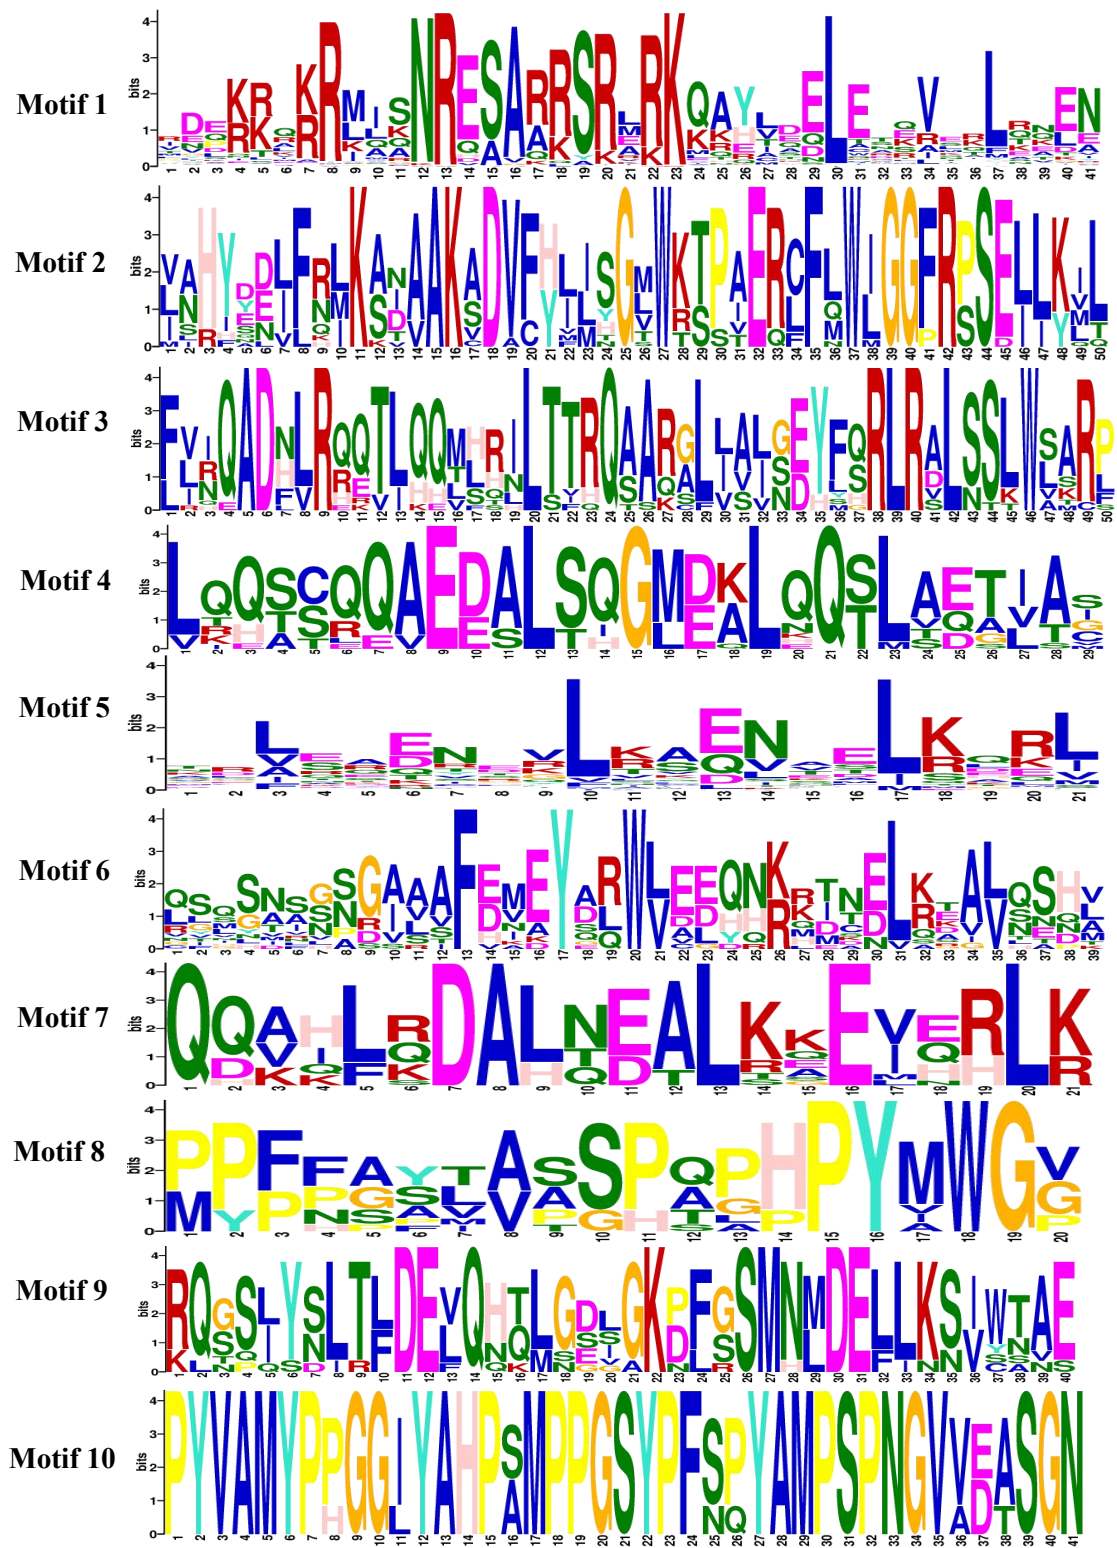

**Figure S1.** Protein motifs in the bZIP members. The colorful boxes delineate different motifs.

Supplement: Supplementary file 1 [file supplementary]
